# Supplementary material for: Synthesis of N-alkoxy amines and hydroxylamines via the iridium-catalyzed transfer hydrogenation of oximes
Source: Royal Society of Chemistry journal article supplement (doi:10.1039/d2ob01084d), 2022-01-01

# Supporting Information

## Synthesis of *N*-alkoxy amines and hydroxylamines via the iridium-catalyzed transfer hydrogenation of oximes

Yanping Xia,<sup>#,b</sup> Sen Wang,<sup>#,b</sup> Rui Miao,<sup>b</sup> Jianhua Liao,<sup>b</sup> Lu Ouyang<sup>\*,b</sup> and Renshi Luo<sup>\*,a, b</sup>

<sup>a</sup>College of Chemistry and Environmental Engineering, Shaoguan University, Shaoguan 512005, China

<sup>b</sup>School of Pharmaceutical Sciences, Gannan Medical University, Ganzhou, Jiangxi Province, P. R. China

E-mail: oyl3074@163.com, luorensi2010@163.com

## List of Contents

|                                                                      |      |
|----------------------------------------------------------------------|------|
| A. Experimental Section.....                                         | S2   |
| B. Procedure for the Preparation of oximes ( <i>E</i> -1).....       | S2   |
| C. Analytical Data of 1.....                                         | S2   |
| D. Procedure for the Preparation of <i>N</i> -alkoxy amines (2)..... | S9   |
| E. Analytical Data of 2.....                                         | S9   |
| F. NMR Spectra.....                                                  | S19  |
| G. HPLC Spectra.....                                                 | S116 |
| H. Crystal X-ray diffraction data of TC-5 and 2l.....                | S117 |
| I. The Deuterated experiments.....                                   | S121 |
| J. The <sup>1</sup> H chemical shift of Ir-H.....                    | S122 |

## A. Experimental section

General Methods:  $^1\text{H}$  and  $^{13}\text{C}$  NMR spectra were recorded by using a Bruker ADVANCE-400 spectrometer (400 MHz for  $^1\text{H}$ ; 100 MHz for  $^{13}\text{C}$ ), using  $\text{CDCl}_3$  as solvent and TMS as an internal standard. The chemical shifts are referenced to signals at 7.26 and 77.0 ppm, respectively. Chemical shifts ( $\delta$ ) are reported in ppm and quoted to the nearest 0.01 ppm relative to the residual protons in  $\text{CDCl}_3$  (7.26 ppm for  $^1\text{H}$ ) or TMS (0 ppm for  $^1\text{H}$ ) and  $\text{CDCl}_3$  (77.0 ppm for  $^{13}\text{C}$ ). Data are reported as follows: Chemical shift (number of protons, multiplicity, coupling constants). Coupling constants were quoted to the nearest 0.1 Hz and multiplicity reported according to the following convention: s = singlet, d = doublet, t = triplet, q = quartet, m = multiplet, br = broad. GC-MS was obtained using electron ionization. TLC was performed by using commercially prepared 100-400 mesh silica gel plates, and visualization was affected at 254 nm.

## B. General procedure for the preparation of oximes (*E*-1)<sup>1</sup>

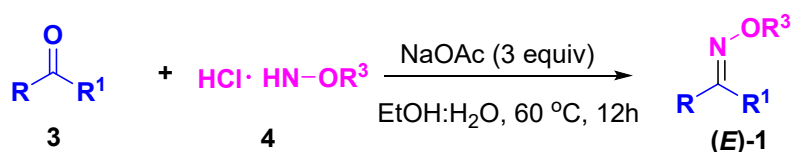

To a 250.0 mL dried tube was added the mixture of ketone **3** (10.0 mmol), alkoxyamine hydrochloride **4** (10.0 equiv), NaOAc (3.0 equiv), in EtOH (16.0 mL) and H<sub>2</sub>O (4.0 mL) successively. The mixture was stirred at room temperature for 12 h under 60 °C. After the reaction was completed, the mixture diluted with H<sub>2</sub>O (45.0 mL), and extracted with EtOAc (45.0 mL\*3). The organic extract was washed with brine and dried over anhydrous MgSO<sub>4</sub>. After removal of the EtOAc in vacuum, the crude product was purified by column chromatography on silica gel with hexanes or petroleum ether/ethyl acetate (100:1 to 200:1) to give oximes **1**.

## C. Analytical Data of **1**

### (*E*)-1-phenylethan-1-one *O*-benzyl oxime (**1a**):<sup>2</sup>

Yield: 1.96 g (87%), colorless oil.  $^1\text{H}$  NMR (400 MHz,  $\text{CDCl}_3$ )  $\delta$  7.63 (dd,  $J = 6.5, 3.1$  Hz, 2H), 7.41 (d,  $J = 7.1$  Hz, 2H), 7.37-7.25 (m, 6H), 5.24 (s, 2H), 2.25 (s, 3H).  $^{13}\text{C}$  NMR (100 MHz,  $\text{CDCl}_3$ )  $\delta$  155.1, 138.2, 136.7, 129.1, 128.5, 128.2, 127.8, 126.2, 76.3, 13.0.

### (*E*)-1-(*p*-tolyl)ethan-1-one *O*-benzyl oxime (**1b**):<sup>3</sup>

Yield: 2.03 g (85%), colorless oil; <sup>1</sup>H NMR (400 MHz, CDCl<sub>3</sub>) δ 7.54 (d, *J* = 8.0 Hz, 2H), 7.45-7.26 (m, 5H), 7.15 (d, *J* = 8.0 Hz, 2H), 5.23 (s, 2H), 2.35 (s, 3H), 2.24 (s, 3H). <sup>13</sup>C NMR (100 MHz, CDCl<sub>3</sub>) δ 155.0, 139.1, 138.2, 133.8, 129.1, 128.4, 128.2, 127.7, 126.0, 76.1, 21.3, 12.9. HRMS-ESI (*m/z*): calcd for C<sub>16</sub>H<sub>18</sub>NO, [M+H]: 240.1388, found 240.1392.

**(*E*)-1-(4-(tert-butyl)phenyl)ethan-1-one *O*-benzyl oxime (1c):**

Yield: 2.39 g (85%), colorless oil. <sup>1</sup>H NMR (400 MHz, CDCl<sub>3</sub>) δ 7.57 (d, *J* = 7.7 Hz, 2H), 7.33 (ddd, *J* = 33.6, 18.5, 7.1 Hz, 7H), 5.22 (s, 2H), 2.23 (s, 3H), 1.33-1.25 (m, 9H). <sup>13</sup>C NMR (100 MHz, CDCl<sub>3</sub>) δ 154.9, 152.3, 138.4, 134.0, 128.5, 128.3, 127.9, 126.0, 125.5, 76.3, 34.8, 31.4, 13.0. HRMS-ESI (*m/z*): calcd for C<sub>19</sub>H<sub>24</sub>NO, [M+H]: 282.1858, found 282.1866.

**(*E*)-1-(3-methoxyphenyl)ethan-1-one *O*-benzyl oxime (1d):<sup>4</sup>**

Yield: 2.04 g (80%), colorless oil. <sup>1</sup>H NMR (400 MHz, CDCl<sub>3</sub>) δ 7.61 (d, *J* = 7.4 Hz, 2H), 7.57-7.34 (m, 6H), 7.05 (d, *J* = 7.2 Hz, 1H), 5.44 (s, 2H), 3.92 (s, 3H), 2.42 (s, 3H). <sup>13</sup>C NMR (100 MHz, CDCl<sub>3</sub>) δ 159.8, 154.9, 138.3, 138.2, 129.5, 128.6, 128.4, 128.0, 118.9, 115.0, 111.6, 76.4, 55.3, 13.1.

**(*E*)-1-(4-isopropylphenyl)ethan-1-one *O*-benzyl oxime (1e):**

Yield: 2.09 g (78%), colorless oil. <sup>1</sup>H NMR (400 MHz, CDCl<sub>3</sub>) δ 7.56 (d, *J* = 8.0 Hz, 2H), 7.40 (d, *J* = 7.5 Hz, 2H), 7.29 (dt, *J* = 25.2, 7.1 Hz, 3H), 7.18 (d, *J* = 8.2 Hz, 2H), 5.22 (s, 2H), 2.97-2.80 (m, 1H), 2.23 (s, 3H), 1.22 (d, *J* = 6.9 Hz, 6H). <sup>13</sup>C NMR (100 MHz, CDCl<sub>3</sub>) δ 155.0, 150.1, 138.4, 134.4, 128.5, 128.2, 127.8, 126.6, 126.2, 76.2, 34.1, 24.0, 13.0. HRMS-ESI (*m/z*): calcd for C<sub>18</sub>H<sub>22</sub>NO, [M+H]: 268.1701, found 268.1698.

**(*E*)-1-(4-chlorophenyl)ethan-1-one *O*-benzyl oxime (1f):<sup>5</sup>**

Yield: 1.45 g (56%), light yellow solid, mp: 54-55°C. <sup>1</sup>H NMR (400 MHz, CDCl<sub>3</sub>) δ 7.55 (d, *J* = 8.5 Hz, 2H), 7.34 (ddd, *J* = 18.9, 12.8, 4.3 Hz, 7H), 5.22 (s, 2H), 2.21 (s, 3H). <sup>13</sup>C NMR (100 MHz, CDCl<sub>3</sub>) δ 153.9, 138.0, 135.1, 128.6, 128.5, 128.2, 127.9, 127.4, 76.4, 12.7.

**(*E*)-1-(4-bromophenyl)ethan-1-one *O*-benzyl oxime (1g) :<sup>4</sup>**

Yield: 1.64 g (54%), light yellow solid, mp: 57-58°C. <sup>1</sup>H NMR (400 MHz, CDCl<sub>3</sub>) δ 7.59-7.15 (m, 9H), 5.22 (s, 2H), 2.21 (s, 3H). <sup>13</sup>C NMR (100 MHz, CDCl<sub>3</sub>) δ 153.9, 138.0, 135.5, 131.6, 128.5, 128.3, 127.9, 127.7, 123.4, 76.4, 12.7.

**(*E*)-1-(3-(trifluoromethyl)phenyl)ethan-1-one *O*-benzyl oxime (1h):**

Yield: 1.91 g (65%), colorless oil. <sup>1</sup>H NMR (400 MHz, CDCl<sub>3</sub>) δ 7.90 (s, 1H), 7.77 (d, *J* = 7.8 Hz, 1H), 7.53 (d, *J* = 7.7 Hz, 1H), 7.47-7.20 (m, 6H), 5.24 (s, 2H), 2.22 (s, 3H). <sup>13</sup>C NMR (100 MHz, CDCl<sub>3</sub>) δ 153.5, 137.9, 137.5, 130.9 (q, *J* = 32 Hz), 129.3, 128.9, 128.3, 128.0, 125.6 (q, *J* = 3 Hz), 122.9 (q, *J* = 4 Hz), 120.1, 76.6, 12.6. HRMS-ESI (*m/z*): calcd for C<sub>16</sub>H<sub>13</sub>F<sub>3</sub>NO, [M+H]: 294.1106, found 294.1109.

**(*E*)-1-(2-fluorophenyl)ethan-1-one *O*-benzyl oxime (1i):<sup>6</sup>**

Yield: 1.41 g (58%), light yellow oil. <sup>1</sup>H NMR (400 MHz, CDCl<sub>3</sub>) δ 7.51-7.25 (m, 7H), 7.15-7.01 (m, 2H), 5.24 (s, 2H), 2.28 (d, *J* = 2.5 Hz, 3H). <sup>13</sup>C NMR (100 MHz, CDCl<sub>3</sub>) δ 160.6 (d, *J* = 244 Hz), 153.7,

137.9, 130.6 (d,  $J = 8$  Hz), 129.7 (d,  $J = 4$  Hz), 128.4, 128.1, 127.8, 125.4 (d,  $J = 13$  Hz), 124.1 (d,  $J = 3$  Hz), 116.1 (d,  $J = 22$  Hz), 76.3, 15.8 (d,  $J = 5$  Hz).

**(E)-1-(3,5-dimethylphenyl)ethan-1-one O-benzyl oxime (1j):**

Yield: 2.10 g (83%), colorless oil.  $^1\text{H NMR}$  (400 MHz,  $\text{CDCl}_3$ )  $\delta$  7.39 (d,  $J = 7.5$  Hz, 2H), 7.35 – 7.20 (m, 5H), 6.94 (s, 1H), 5.23 (s, 2H), 2.28 (s, 6H), 2.22 (s, 3H).  $^{13}\text{C NMR}$  (100 MHz,  $\text{CDCl}_3$ )  $\delta$  155.5, 138.3, 138.0, 136.7, 130.9, 128.5, 128.2, 127.9, 124.1, 76.3, 21.5, 13.3. HRMS-ESI (m/z): calcd for  $\text{C}_{17}\text{H}_{20}\text{NO}$ ,  $[\text{M}+\text{H}]$ : 254.1545, found 254.1545.

**(E)-1-(4-fluoro-3-methoxyphenyl)ethan-1-one O-benzyl oxime (1k):**

Yield: 1.80 g (66%), light yellow solid, mp: 55-57°C.  $^1\text{H NMR}$  (400 MHz,  $\text{CDCl}_3$ )  $\delta$  7.53-7.23 (m, 7H), 6.89 (t,  $J = 8.6$  Hz, 1H), 5.21 (s, 2H), 3.86 (s, 3H), 2.20 (s, 3H).  $^{13}\text{C NMR}$  (100 MHz,  $\text{CDCl}_3$ )  $\delta$  153.5 (d,  $J = 3$  Hz), 152.2 (d,  $J = 246$  Hz), 148.5 (d,  $J = 11$  Hz), 138.1, 129.7 (d,  $J = 7$  Hz), 128.4, 128.2, 127.8, 122.1 (d,  $J = 3$  Hz), 113.7 (d,  $J = 20$  Hz), 112.8 (d,  $J = 2$  Hz), 76.3, 56.2, 12.6. HRMS-ESI (m/z): calcd for  $\text{C}_{16}\text{H}_{17}\text{FNO}_2$ ,  $[\text{M}+\text{H}]$ : 274.1243, found 274.1243.

**(E)-1-(naphthalen-2-yl)ethan-1-one O-benzyl oxime (1l):**

Yield: 2.20 g (80%), light yellow solid, mp: 97-98°C.  $^1\text{H NMR}$  (400 MHz,  $\text{CDCl}_3$ )  $\delta$  7.98 (s, 1H), 7.92 (d,  $J = 8.7$  Hz, 1H), 7.81 (ddd,  $J = 16.6, 9.4, 5.9$  Hz, 3H), 7.50-7.26 (m, 7H), 5.29 (s, 2H), 2.37 (s, 3H).  $^{13}\text{C NMR}$  (100 MHz,  $\text{CDCl}_3$ )  $\delta$  154.8, 138.1, 134.0, 133.7, 133.2, 128.5, 128.5, 128.3, 128.0, 127.9, 127.7, 126.6, 126.3, 125.8, 123.6, 76.4, 12.7. HRMS-ESI (m/z): calcd for  $\text{C}_{19}\text{H}_{18}\text{NO}$ ,  $[\text{M}+\text{H}]$ : 276.1388, found 276.1391.

**(E)-1-(6-methylpyridin-2-yl)ethan-1-one O-benzyl oxime (1m):**

Yield: 1.27 g (53%), colorless oil.  $^1\text{H NMR}$  (400 MHz,  $\text{CDCl}_3$ )  $\delta$  7.66 (d,  $J = 7.8$  Hz, 1H), 7.51 (t,  $J = 7.7$  Hz, 1H), 7.45-7.27 (m, 5H), 7.07 (d,  $J = 7.5$  Hz, 1H), 5.26 (s, 2H), 2.55 (s, 3H), 2.36 (s, 3H).  $^{13}\text{C NMR}$  (100 MHz,  $\text{CDCl}_3$ )  $\delta$  157.6, 156.6, 153.8, 138.1, 136.3, 128.4, 128.1, 127.8, 123.0, 117.7, 76.4, 24.6, 11.6. HRMS-ESI (m/z): calcd for  $\text{C}_{15}\text{H}_{17}\text{N}_2\text{O}$ ,  $[\text{M}+\text{H}]$ : 243.1341, found 243.1342.

**(E)-1-(thiophen-2-yl)ethan-1-one O-benzyl oxime (1n):**

Yield: 1.06 g (46%), colorless oil.  $^1\text{H NMR}$  (400 MHz,  $\text{CDCl}_3$ )  $\delta$  7.50-7.14 (m, 7H), 7.00 (t,  $J = 4.2$  Hz, 1H), 5.20 (s, 2H), 2.25 (d,  $J = 9.3$  Hz, 3H).  $^{13}\text{C NMR}$  (100 MHz,  $\text{CDCl}_3$ )  $\delta$  151.0, 140.5, 137.8, 128.4, 128.3, 127.9, 127.0, 126.8, 126.2, 76.4, 13.1. HRMS-ESI (m/z): calcd for  $\text{C}_{13}\text{H}_{14}\text{NOS}$ ,  $[\text{M}+\text{H}]$ : 232.0791, found 232.0806.

**(E)-2,3-dihydro-1H-inden-1-one O-benzyl oxime (1o):**

Yield: 1.80 g (76%), colorless oil.  $^1\text{H NMR}$  (400 MHz,  $\text{CDCl}_3$ )  $\delta$  7.67 (d,  $J = 7.6$  Hz, 1H), 7.38 (d,  $J = 7.4$  Hz, 2H), 7.29 (t,  $J = 7.3$  Hz, 2H), 7.26-7.12 (m, 4H), 5.20 (s, 2H), 2.85 (d,  $J = 7.4$  Hz, 4H).  $^{13}\text{C NMR}$  (100 MHz,  $\text{CDCl}_3$ )  $\delta$  163.2, 148.4, 138.5, 136.4, 130.4, 128.5, 128.3, 127.9, 127.1, 125.7, 121.8, 76.4, 28.7, 26.8. HRMS-ESI (m/z): calcd for  $\text{C}_{16}\text{H}_{16}\text{NO}$ ,  $[\text{M}+\text{H}]$ : 238.1232, found 238.1238.

**(E)-7-fluoro-2,3-dihydro-1H-inden-1-one O-benzyl oxime (1p):**

Yield: 1.94 g (76%), light yellow solid, mp: 70-72°C.  $^1\text{H NMR}$  (400 MHz,  $\text{CDCl}_3$ )  $\delta$  7.47-7.19 (m, 6H), 7.04 (d,  $J = 7.5$  Hz, 1H), 6.91 (t,  $J = 9.0$  Hz, 1H), 5.26 (s, 2H), 3.10-2.97 (m, 2H), 2.94 (dd,  $J = 8.3, 4.4$

Hz, 2H). <sup>13</sup>C NMR (100 MHz, CDCl<sub>3</sub>) δ 161.7 (d, *J* = 5 Hz), 158.4 (d, *J* = 236 Hz), 151.3 (d, *J* = 3 Hz), 138.0, 131.4 (d, *J* = 7 Hz), 128.4, 128.3, 127.9, 123.6 (d, *J* = 13 Hz), 121.3 (d, *J* = 4 Hz), 114.2 (d, *J* = 19 Hz), 76.6, 28.9, 27.0. HRMS-ESI (*m/z*): calcd for C<sub>16</sub>H<sub>15</sub>FNO, [M+H]: 256.1138, found 256.1147.

**(E)-5-fluoro-2,3-dihydro-1H-inden-1-one O-benzyl oxime (1q):**

Yield: 1.99 g (78%), colorless oil. <sup>1</sup>H NMR (400 MHz, CDCl<sub>3</sub>) δ 7.64 (dd, *J* = 8.0, 5.6 Hz, 1H), 7.34 (ddd, *J* = 23.5, 16.9, 7.2 Hz, 5H), 6.94 (dd, *J* = 14.7, 8.4 Hz, 2H), 5.20 (s, 2H), 2.95 (dt, *J* = 7.8, 6.4 Hz, 4H). <sup>13</sup>C NMR (100 MHz, CDCl<sub>3</sub>) δ 164.4 (d, *J* = 248 Hz), 161.8, 150.6 (d, *J* = 9 Hz), 138.2, 132.2 (d, *J* = 3 Hz), 128.4, 128.1, 127.8, 123.0 (d, *J* = 8 Hz), 114.8 (d, *J* = 3 Hz), 112.3 (d, *J* = 229 Hz), 76.2, 28.6, 27.0. HRMS-ESI (*m/z*): calcd for C<sub>16</sub>H<sub>15</sub>FNO, [M+H]: 256.1138, found 256.1148.

**(E)-6-methyl-2,3-dihydro-1H-inden-1-one O-benzyl oxime (1r):**

Yield: 2.04 g (81%), light yellow solid, mp: 68-70°C. <sup>1</sup>H NMR (400 MHz, CDCl<sub>3</sub>) δ 7.51 (s, 1H), 7.45-7.24 (m, 5H), 7.16 (dd, *J* = 17.9, 7.7 Hz, 2H), 5.22 (s, 2H), 2.94 (dd, *J* = 10.7, 6.3 Hz, 4H), 2.35 (s, 3H). <sup>13</sup>C NMR (100 MHz, CDCl<sub>3</sub>) δ 163.3, 145.5, 138.3, 136.7, 136.2, 131.4, 128.3, 128.0, 127.7, 125.2, 121.8, 76.1, 28.2, 27.0, 21.1. HRMS-ESI (*m/z*): calcd for C<sub>17</sub>H<sub>18</sub>NO, [M+H]: 252.1388, found 252.1395.

**(E)-3,4-dihydronaphthalen-1(2H)-one O-benzyl oxime (1s):**

Yield: 2.14 g (85%), colorless oil. <sup>1</sup>H NMR (400 MHz, CDCl<sub>3</sub>) δ 7.99 (d, *J* = 7.5 Hz, 1H), 7.38 (d, *J* = 7.2 Hz, 2H), 7.34-7.21 (m, 3H), 7.20-7.09 (m, 2H), 7.04 (d, *J* = 7.4 Hz, 1H), 5.21 (s, 2H), 2.69 (dt, *J* = 12.1, 6.4 Hz, 4H), 1.85-1.62 (m, 2H). <sup>13</sup>C NMR (100 MHz, CDCl<sub>3</sub>) δ 154.5, 139.7, 138.4, 130.9, 129.1, 128.7, 128.5, 128.3, 127.9, 126.5, 124.5, 76.4, 29.9, 24.8, 21.6. HRMS-ESI (*m/z*): calcd for C<sub>17</sub>H<sub>18</sub>NO, [M+H]: 252.1388, found 252.1394.

**(E)-3,4-dihydronaphthalen-1(2H)-one O-methyl oxime (1t):**

Yield: 1.40 g (80%), colorless oil. <sup>1</sup>H NMR (400 MHz, CDCl<sub>3</sub>) δ 7.97 (d, *J* = 7.6 Hz, 1H), 7.25-7.13 (m, 2H), 7.09 (d, *J* = 7.4 Hz, 1H), 3.97 (s, 3H), 2.71 (dd, *J* = 8.4, 5.0 Hz, 4H), 1.81 (dt, *J* = 12.7, 6.5 Hz, 2H). <sup>13</sup>C NMR (100 MHz, CDCl<sub>3</sub>) δ 154.0, 139.5, 130.8, 129.0, 128.6, 126.4, 124.3, 62.0, 29.8, 24.3, 21.5. HRMS-ESI (*m/z*): calcd for C<sub>11</sub>H<sub>14</sub>NO, [M+H]: 176.1075, found 176.1083.

**(E)-7-methoxy-3,4-dihydronaphthalen-1(2H)-one O-benzyl oxime (1v):**

Yield: 2.02 g (72%), colorless oil. <sup>1</sup>H NMR (400 MHz, CDCl<sub>3</sub>) δ 7.52 (d, *J* = 2.2 Hz, 1H), 7.31 (ddd, *J* = 25.3, 20.8, 7.3 Hz, 5H), 6.97 (d, *J* = 8.4 Hz, 1H), 6.79 (dd, *J* = 8.4, 2.6 Hz, 1H), 5.22 (s, 2H), 3.74 (s, 3H), 2.72 (t, *J* = 6.6 Hz, 2H), 2.65-2.52 (m, 2H), 1.80-1.66 (m, 2H). <sup>13</sup>C NMR (100 MHz, CDCl<sub>3</sub>) δ 158.3, 154.4, 138.45, 132.36, 131.6, 129.7, 128.5, 128.3, 127.9, 116.6, 107.9, 76.4, 55.42, 29.07, 24.57, 21.83.

**(E)-6-chloro-3,4-dihydronaphthalen-1(2H)-one O-benzyl oxime (1w):**

Yield: 1.89 g (66%), colorless oil; <sup>1</sup>H NMR (400 MHz, CDCl<sub>3</sub>) δ 7.90 (d, *J* = 8.5 Hz, 1H), 7.34 (ddd, *J* = 23.8, 16.7, 7.1 Hz, 5H), 7.17-6.98 (m, 2H), 5.21 (s, 2H), 2.71 (dt, *J* = 12.0, 6.3 Hz, 4H), 1.80 (dd, *J* = 12.6, 6.3 Hz, 2H). <sup>13</sup>C NMR (100 MHz, CDCl<sub>3</sub>) δ 153.5, 141.2, 138.1, 134.7, 129.3, 128.4, 128.4, 128.2, 127.8, 126.7, 125.9, 76.4, 29.6, 24.4, 21.2. HRMS-ESI (*m/z*): calcd for C<sub>17</sub>H<sub>17</sub>ClNO, [M+H]: 286.0999, found 286.1004.

**(E)-1-phenylbutan-1-one O-benzyl oxime (1x):**

Yield: 0.88 g (35%), light yellow oil. <sup>1</sup>H NMR (400 MHz, CDCl<sub>3</sub>) δ 7.56-7.49 (m, 2H), 7.36-7.14 (m, 8H), 5.13 (d, *J* = 5.0 Hz, 2H), 2.71-2.61 (m, 2H), 1.47 (dt, *J* = 12.7, 7.4 Hz, 2H), 0.84 (td, *J* = 7.3, 4.8 Hz, 3H). <sup>13</sup>C NMR (100 MHz, CDCl<sub>3</sub>) δ 159.0, 138.4, 136.0, 129.1, 128.5, 128.5, 128.2, 127.8, 126.5, 76.2, 28.8, 20.1, 14.4.

**Phenyl(p-tolyl)methanone O-methyl oxime (1y):<sup>22</sup>**

Yield: 1.78 g (79%), light yellow oil. <sup>1</sup>H NMR (400 MHz, CDCl<sub>3</sub>) δ 7.47 (dd, *J* = 7.8, 1.6 Hz, 1H), 7.40-7.11 (m, 7H), 7.07 (d, *J* = 8.1 Hz, 1H), 3.93 (d, *J* = 7.3 Hz, 3H), 2.31 (d, *J* = 19.9 Hz, 3H). <sup>13</sup>C NMR (100 MHz, CDCl<sub>3</sub>) δ 156.9, 156.9, 139.5, 138.9, 136.8, 133.8, 133.7, 130.5, 129.5, 129.4, 129.4, 129.2, 129.0, 128.9, 128.4, 128.3, 128.1, 128.0, 62.5, 62.5, 21.7, 21.5.

**(E)-1-phenylethan-1-one oxime (1ba):<sup>7</sup>**

Yield: 0.97 g (72%), light yellow solid, mp: 50-51°C. <sup>1</sup>H NMR (400 MHz, CDCl<sub>3</sub>) δ 9.48 (s, 1H), 7.62 (dd, *J* = 6.6, 3.0 Hz, 2H), 7.38 (dd, *J* = 4.9, 1.7 Hz, 3H), 2.31 (s, 3H). <sup>13</sup>C NMR (100 MHz, CDCl<sub>3</sub>) δ 156.1, 136.5, 129.3, 128.6, 126.1, 12.4.

**(E)-1-(4-fluorophenyl)ethan-1-one oxime (1bb):<sup>14</sup>**

Yield: 1.33 g (87%), white solid, mp: 68-73°C. <sup>1</sup>H NMR (400 MHz, CDCl<sub>3</sub>) δ 10.17 (s, 1H), 7.70-7.51 (m, 2H), 7.04 (t, *J* = 8.7 Hz, 2H), 2.27 (s, 3H). <sup>13</sup>C NMR (100 MHz, CDCl<sub>3</sub>) δ 163.5 (d, *J* = 247 Hz), 155.34, 132.6 (d, *J* = 3 Hz), 128.0 (d, *J* = 8 Hz), 115.6 (d, *J* = 22 Hz), 12.5.

**(E)-1-(4-chlorophenyl)ethan-1-one oxime (1bc):<sup>15</sup>**

Yield: 1.44 g (85%), white solid, mp: 97-100°C. <sup>1</sup>H NMR (400 MHz, CDCl<sub>3</sub>) δ 10.10 (s, 1H), 7.53 (d, *J* = 5.7 Hz, 2H), 7.32 (d, *J* = 5.1 Hz, 2H), 2.26 (d, *J* = 2.7 Hz, 3H). <sup>13</sup>C NMR (100 MHz, CDCl<sub>3</sub>) δ 155.3, 135.4, 134.8, 128.8, 127.4, 12.5.

**(E)-1-(p-tolyl)ethan-1-one oxime (1bd):<sup>16</sup>**

Yield: 1.18 g (79%), white solid, mp: 78-88°C. <sup>1</sup>H NMR (400 MHz, CDCl<sub>3</sub>) δ 10.10 (s, 1H), 7.50 (dd, *J* = 7.3, 5.4 Hz, 2H), 7.16 (dd, *J* = 7.2, 5.1 Hz, 2H), 2.43 – 2.18 (m, 6H). <sup>13</sup>C NMR (100 MHz, CDCl<sub>3</sub>) δ 155.9, 139.4, 133.7, 129.3, 126.1, 21.3, 12.5.

**(E)-1-(4-(tert-butyl)phenyl)ethan-1-one oxime (1be):<sup>17</sup>**

Yield: 1.55 g (81%), white solid, mp: 100-101°C. <sup>1</sup>H NMR (400 MHz, CDCl<sub>3</sub>) δ 10.22 (s, 1H), 7.57 (d, *J* = 8.5 Hz, 2H), 7.40 (d, *J* = 8.5 Hz, 2H), 2.30 (s, 3H), 1.31 (s, 9H). <sup>13</sup>C NMR (100 MHz, CDCl<sub>3</sub>) δ 155.8, 152.5, 133.8, 125.9, 125.6, 34.8, 31.3, 12.5.

**(E)-1-(naphthalen-2-yl)ethan-1-one oxime (1bf):<sup>18</sup>**

Yield: 1.20 g (65%), white solid, mp: 143-146°C. <sup>1</sup>H NMR (400 MHz, CDCl<sub>3</sub>) δ 8.77 (s, 1H), 8.03 (s, 1H), 7.93-7.77 (m, 4H), 7.56-7.44 (m, 2H), 2.42 (s, 3H). <sup>13</sup>C NMR (100 MHz, CDCl<sub>3</sub>) δ 156.0, 133.8, 133.7, 133.1, 128.5, 128.2, 127.7, 126.7, 126.4, 126.0, 123.3, 12.2.

**(E)-1-(furan-2-yl)ethan-1-one oxime (1bg):<sup>21</sup>**

Yield: 1.04 g (83%), white solid, mp: 102-104°C. <sup>1</sup>H NMR (400 MHz, CDCl<sub>3</sub>) δ 10.00 (s, 1H), 7.46 (d, *J* = 1.5 Hz, 1H), 6.63 (d, *J* = 3.4 Hz, 1H), 6.43 (dd, *J* = 3.3, 1.8 Hz, 1H), 2.22 (s, 3H). <sup>13</sup>C NMR (100 MHz, CDCl<sub>3</sub>) δ 150.2, 147.4, 143.7, 111.3, 110.1, 11.2.

**(*E*)-benzaldehyde *O*-benzyl oxime (1bh):**<sup>11</sup>

Yield: 1.77 g (84%), colorless oil. <sup>1</sup>H NMR (400 MHz, CDCl<sub>3</sub>) δ 8.13 (s, 1H), 7.57 (dd, *J* = 6.2, 2.7 Hz, 2H), 7.42 (d, *J* = 7.2 Hz, 2H), 7.39-7.26 (m, 6H), 5.21 (s, 2H). <sup>13</sup>C NMR (100 MHz, CDCl<sub>3</sub>) δ 149.1, 137.5, 132.3, 129.9, 128.7, 128.5, 128.4, 128.0, 127.1, 76.4.

**(*E*)-4-fluorobenzaldehyde *O*-benzyl oxime (1bi):**<sup>12</sup>

Yield: 1.74 g (76%), colorless oil. <sup>1</sup>H NMR (400 MHz, CDCl<sub>3</sub>) δ 8.10 (s, 1H), 7.55 (dd, *J* = 7.6, 5.7 Hz, 2H), 7.45-7.30 (m, 5H), 7.04 (t, *J* = 8.3 Hz, 2H), 5.19 (s, 2H). <sup>13</sup>C NMR (100 MHz, CDCl<sub>3</sub>) δ 163.7 (d, *J* = 248 Hz), 147.9, 137.5, 129.0, 128.9, 128.5, 128.4, 128.0, 115.8 (d, *J* = 21 Hz), 76.5.

**(*E*)-4-methylbenzaldehyde *O*-benzyl oxime (1bj):**

Yield: 1.69 g (75%), colorless oil. <sup>1</sup>H NMR (400 MHz, CDCl<sub>3</sub>) δ 8.06 (s, 1H), 7.40 (dd, *J* = 15.6, 7.7 Hz, 4H), 7.34-7.20 (m, 3H), 7.07 (d, *J* = 7.8 Hz, 2H), 5.17 (s, 2H), 2.26 (s, 3H). <sup>13</sup>C NMR (100 MHz, CDCl<sub>3</sub>) δ 149.2, 140.1, 137.9, 129.7, 129.6, 128.6, 128.6, 128.1, 127.3, 76.5, 21.6. HRMS-ESI (*m/z*): calcd for C<sub>15</sub>H<sub>16</sub>NO, [M+H]: 226.1232, found 226.1239.

**(*E*)-2-naphthaldehyde *O*-benzyl oxime (1bk):**<sup>12</sup>

Yield: 2.04 g (78%), Light yellow solid, mp: 57-58°C. <sup>1</sup>H NMR (400 MHz, CDCl<sub>3</sub>) δ 8.27 (s, 1H), 7.81 (dt, *J* = 12.6, 8.5 Hz, 5H), 7.52-7.27 (m, 7H), 5.24 (d, *J* = 7.3 Hz, 2H). <sup>13</sup>C NMR (100 MHz, CDCl<sub>3</sub>) δ 149.3, 137.6, 134.16, 133.2, 130.0, 128.6, 128.5, 128.5, 128.4, 128.1, 127.9, 126.9, 126.6, 123.1, 76.6.

**(*E*)-furan-2-carbaldehyde *O*-benzyl oxime (1bl):**<sup>13</sup>

Yield: 1.37 g (68%), colorless oil. <sup>1</sup>H NMR (400 MHz, CDCl<sub>3</sub>) δ 7.99 (s, 1H), 7.35 (ddd, *J* = 22.0, 17.1, 9.8 Hz, 6H), 6.55 (d, *J* = 3.3 Hz, 1H), 6.40 (d, *J* = 1.8 Hz, 1H), 5.20 (s, 2H). <sup>13</sup>C NMR (100 MHz, CDCl<sub>3</sub>) δ 147.2, 144.3, 139.4, 137.2, 128.5, 128.5, 128.1, 112.9, 111.7, 76.8.

**propan-2-one *O*-benzyl oxime (1aa):**<sup>8</sup>

Yield: 0.77 g (47%), colorless oil. <sup>1</sup>H NMR (400 MHz, CDCl<sub>3</sub>) δ 7.47-7.12 (m, 5H), 5.07 (s, 2H), 1.88 (d, *J* = 7.4 Hz, 6H). <sup>13</sup>C NMR (100 MHz, CDCl<sub>3</sub>) δ 155.2, 138.4, 128.3, 127.9, 127.6, 75.3, 21.9, 15.8.

**(*E*)-3,3-dimethylbutan-2-one *O*-benzyl oxime (1ab):**

Yield: 0.82 g (40%), colorless oil. <sup>1</sup>H NMR (400 MHz, CDCl<sub>3</sub>) δ 7.47-7.18 (m, 5H), 5.07 (s, 2H), 1.82 (s, 3H), 1.10 (s, 9H). <sup>13</sup>C NMR (100 MHz, CDCl<sub>3</sub>) δ 163.7, 138.6, 128.2, 128.1, 127.5, 75.4, 37.1, 27.7, 10.7. HRMS-ESI (*m/z*): calcd for C<sub>13</sub>H<sub>20</sub>NO, [M+H]: 206.1545, found 206.1551.

**pentan-3-one *O*-benzyl oxime (1ac):**

Yield: 1.62 g (85%), colorless oil. <sup>1</sup>H NMR (400 MHz, CDCl<sub>3</sub>) δ 7.37-7.23 (m, 5H), 5.06 (s, 2H), 2.33 (q, *J* = 7.6 Hz, 2H), 2.18 (q, *J* = 7.5 Hz, 2H), 1.06 (dt, *J* = 10.6, 7.6 Hz, 6H). <sup>13</sup>C NMR (100 MHz, CDCl<sub>3</sub>) δ 163.8, 138.5, 128.3, 128.0, 127.6, 75.3, 27.2, 21.5, 11.2, 10.5.

**1-(4-fluorophenyl)ethan-1-one oxime (1ad):**

Yield: 1.49 g (78%), colorless oil. <sup>1</sup>H NMR (400 MHz, CDCl<sub>3</sub>) δ 7.37-7.24 (m, 5H), 5.06 (d, *J* = 10.4 Hz, 2H), 2.37-2.10 (m, 1H), 1.84 (d, *J* = 6.1 Hz, 3H), 1.50 (dt, *J* = 14.7, 7.4 Hz, 2H), 0.91 (dt, *J* = 12.0, 7.4 Hz, 3H). <sup>13</sup>C NMR (100 MHz, CDCl<sub>3</sub>) δ 158.9, 158.3, 138.5, 138.4, 128.3, 127.9, 127.8, 127.6, 127.6, 75.3, 75.2, 37.8, 31.4, 20.0, 19.9, 19.1, 14.2, 14.1, 13.7.

**Cyclohexanone *O*-benzyl oxime (1af):<sup>2</sup>**

Yield: 1.63 g (80%), colorless oil. <sup>1</sup>H NMR (400 MHz, CDCl<sub>3</sub>) δ 7.31 (dt, *J* = 17.0, 6.5 Hz, 5H), 5.06 (s, 2H), 2.50 (t, *J* = 5.5 Hz, 2H), 2.30-2.06 (m, 2H), 1.71-1.44 (m, 6H). <sup>13</sup>C NMR (100 MHz, CDCl<sub>3</sub>) δ 160.8, 138.4, 128.3, 127.9, 127.6, 75.2, 32.3, 27.1, 25.9, 25.8, 25.5.

**5-methoxy-3,4-dihydronaphthalen-2(1H)-one *O*-benzyl oxime (1ag):**

Yield: 2.19 g (78%), colorless oil. <sup>1</sup>H NMR (400 MHz, CDCl<sub>3</sub>) δ 7.46-7.22 (m, 5H), 7.13 (t, *J* = 7.9 Hz, 1H), 6.82-6.61 (m, 2H), 5.11 (d, *J* = 17.6 Hz, 2H), 3.81 (s, 4H), 3.49 (s, 1H), 2.86 (dd, *J* = 12.6, 6.2 Hz, 2H), 2.68 (t, *J* = 6.7 Hz, 1H), 2.51 (t, *J* = 6.5 Hz, 1H). <sup>13</sup>C NMR (100 MHz, CDCl<sub>3</sub>) δ 159.2, 158.4, 156.7, 156.2, 138.3, 138.1, 136.5, 134.8, 128.4, 128.4, 128.0, 127.9, 127.8, 127.7, 127.0, 127.0, 126.4, 125.7, 121.0, 120.2, 108.4, 107.6, 75.6, 75.5, 55.5, 55.4, 35.0, 29.3, 28.5, 24.3, 21.9, 19.9. HRMS-ESI (*m/z*): calcd for C<sub>18</sub>H<sub>20</sub>NO<sub>2</sub>, [M+H]: 282.1494, found 282.1494.

**Cyclohexanone *O*-methyl oxime (1ah):<sup>10</sup>**

Yield: 0.99 g (78%), colorless oil. <sup>1</sup>H NMR (400 MHz, CDCl<sub>3</sub>) δ 3.81 (s, 3H), 2.44 (t, *J* = 6.1 Hz, 2H), 2.25-2.14 (m, 2H), 1.73-1.53 (m, 6H). <sup>13</sup>C NMR (100 MHz, CDCl<sub>3</sub>) δ 160.1, 60.9, 32.2, 27.0, 25.8, 25.7, 25.1.

**4-phenylbutan-2-one *O*-benzyl oxime (1ai):**

Yield: 2.03 g (80%), colorless oil. <sup>1</sup>H NMR (400 MHz, CDCl<sub>3</sub>) δ 7.25 (ddd, *J* = 25.4, 14.7, 7.4 Hz, 7H), 7.18-7.09 (m, 3H), 5.07 (d, *J* = 8.1 Hz, 2H), 2.78 (dd, *J* = 15.9, 8.0 Hz, 2H), 2.44 (dd, *J* = 16.0, 8.0 Hz, 2H), 1.84 (d, *J* = 8.0 Hz, 3H). <sup>13</sup>C NMR (100 MHz, CDCl<sub>3</sub>) δ 157.3, 157.3, 141.4, 141.4, 138.7, 138.6, 128.6, 128.6, 128.6, 128.6, 128.5, 128.5, 128.1, 128.1, 127.8, 127.8, 126.3, 126.2, 75.6, 75.5, 37.9, 37.9, 32.9, 32.9, 14.8, 14.8. HRMS-ESI (*m/z*): calcd for C<sub>17</sub>H<sub>20</sub>NO, [M+H]: 254.1545, found 254.1558.

**Cyclobutanone *O*-benzyl oxime (1aj):<sup>9</sup>**

Yield: 1.44 g (82%), colorless oil. <sup>1</sup>H NMR (400 MHz, CDCl<sub>3</sub>) δ 7.57-7.20 (m, 5H), 5.03 (s, 2H), 2.89 (dt, *J* = 14.9, 7.6 Hz, 4H), 2.08-1.85 (m, 2H). <sup>13</sup>C NMR (100 MHz, CDCl<sub>3</sub>) δ 159.3, 138.3, 128.4, 128.1, 127.8, 75.6, 31.7, 31.3, 14.6.

**cyclohexanone oxime (1ak):<sup>21</sup>**

Yield: 0.86 g (76%), white solid, mp: 83-88°C. <sup>1</sup>H NMR (400 MHz, CDCl<sub>3</sub>) δ 9.23 (s, 1H), 2.61-2.44 (m, 2H), 2.27-2.15 (m, 2H), 1.76-1.51 (m, 6H). <sup>13</sup>C NMR (100 MHz, CDCl<sub>3</sub>) δ 160.8, 32.2, 26.9, 25.8, 25.6, 24.5.

**5-methoxy-3,4-dihydronaphthalen-2(1H)-one oxime (1al):<sup>19</sup>**

Yield: 1.38 g (72%), brown solid, mp: 135-141°C. <sup>1</sup>H NMR (400 MHz, CDCl<sub>3</sub>) δ 9.18 (s, 1H), 7.15 (t,



$J = 7.9$  Hz, 1H), 6.80 (d,  $J = 7.6$  Hz, 1H), 6.72 (d,  $J = 8.1$  Hz, 1H), 3.83 (d,  $J = 4.3$  Hz, 5H), 2.88 (t,  $J = 6.6$  Hz, 2H), 2.54 (t,  $J = 6.6$  Hz, 2H).  $^{13}\text{C}$  NMR (100 MHz,  $\text{CDCl}_3$ )  $\delta$  159.8, 159.0, 156.6, 156.2, 136.2, 134.6, 127.0, 127.0, 126.3, 125.7, 121.1, 120.2, 108.4, 107.7, 55.5, 55.4, 34.9, 28.6, 28.5, 23.5, 21.7, 19.8.

**(E)-4-phenylbutan-2-one oxime (1a):**<sup>20</sup>

Yield: 1.09 g (67%), white solid, mp: 83-86°C.  $^1\text{H}$  NMR (400 MHz,  $\text{CDCl}_3$ )  $\delta$  8.76 (s, 1H), 7.35-7.27 (m, 2H), 7.21 (dd,  $J = 7.2, 5.1$  Hz, 3H), 2.84 (dd,  $J = 9.5, 6.7$  Hz, 2H), 2.61-2.41 (m, 2H), 1.93 (s, 3H).  $^{13}\text{C}$  NMR (100 MHz,  $\text{CDCl}_3$ )  $\delta$  158.0, 141.2, 128.6, 128.4, 126.2, 37.8, 32.9, 14.0.

**D. General procedure for the preparation of N-alkoxy amines (2):**

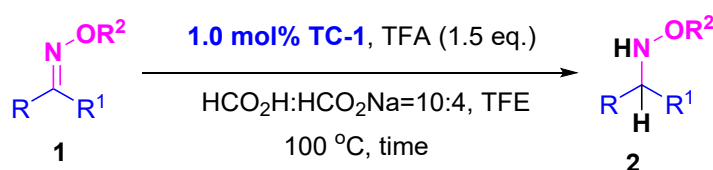

To a 25.0 mL dried tube was added the mixture of oximes **1** (0.25 mmol), TC-1 (1.0 mol %),  $\text{CF}_3\text{COOH}$  (1.5 equiv),  $\text{HCOOH}$  (1.25 equiv),  $\text{HCOONa}$  (0.5 equiv) in trifluoroethanol (2.0 mL) successively. The mixture was stirred at 100°C for 14 h under an  $\text{N}_2$  atmosphere. After the reaction was completed, the mixture was cooled to room temperature and diluted with  $\text{H}_2\text{O}$  (15.0 mL), neutralized with  $\text{NaHCO}_3$  (aq.), and extracted with EtOAc (10.0 mL  $\times$  3). The organic extract was washed with  $\text{H}_2\text{O}$  (10.0 mL  $\times$  3) and dried over anhydrous  $\text{MgSO}_4$ . After removal of the EtOAc in vacuum, the crude product was purified by column chromatography on silica gel with hexanes or petroleum ether/ethyl acetate (50:1~100:1) to give the desired products **2**. The enantioselectivity of **2a** was determined by chiral AD-H column, hexane/*i*-PrOH=99:1, 0.5 mL/min.

**E. Analytical Data of 2**

**O-benzyl-N-(1-phenylethyl)hydroxylamine (2a):**<sup>23</sup>

Yield: 51.7 mg (91%), colorless oil.  $^1\text{H}$  NMR (400 MHz,  $\text{CDCl}_3$ )  $\delta$  7.29 (ddd,  $J = 16.2, 14.0, 7.3$  Hz, 10H), 5.56 (s, 1H), 4.61 (q,  $J = 11.4$  Hz, 2H), 4.15 (q,  $J = 6.6$  Hz, 1H), 1.35 (d,  $J = 6.6$  Hz, 3H).  $^{13}\text{C}$  NMR (100 MHz,  $\text{CDCl}_3$ )  $\delta$  143.0, 137.9, 128.6, 128.5, 128.4, 127.9, 127.5, 127.3, 76.9, 60.7, 20.0.

**O-benzyl-N-(1-(p-tolyl)ethyl)hydroxylamine (2b):**

Yield: 56.1 mg (93%), colorless oil.  $^1\text{H}$  NMR (400 MHz,  $\text{CDCl}_3$ )  $\delta$  7.36-7.16 (m, 7H), 7.13 (d,  $J = 7.5$  Hz, 2H), 5.57 (s, 1H), 4.62 (q,  $J = 11.5$  Hz, 2H), 4.12 (q,  $J = 6.5$  Hz, 1H), 2.32 (s, 3H), 1.34 (d,  $J = 6.4$

Hz, 3H). <sup>13</sup>C NMR (100 MHz, CDCl<sub>3</sub>) δ 139.9, 138.0, 137.1, 129.2, 128.6, 128.4, 127.8, 127.2, 76.8, 60.4, 21.2, 20.0. HRMS-ESI (m/z): calcd for C<sub>16</sub>H<sub>20</sub>NO, [M+H]: 242.1545, found 242.1536.

***O*-benzyl-*N*-(1-(4-(tert-butyl)phenyl)ethyl)hydroxylamine (2c):**

Yield: 63.0 mg (89%), colorless oil. <sup>1</sup>H NMR (400 MHz, CDCl<sub>3</sub>) δ 7.40-7.20 (m, 9H), 5.59 (s, 1H), 4.64 (dd, *J* = 27.2, 11.4 Hz, 2H), 4.14 (q, *J* = 6.5 Hz, 1H), 1.37 (d, *J* = 6.6 Hz, 3H), 1.30 (d, *J* = 11.3 Hz, 9H). <sup>13</sup>C NMR (100 MHz, CDCl<sub>3</sub>) δ 150.3, 139.7, 138.0, 128.6, 128.4, 127.8, 127.0, 125.4, 76.8, 60.3, 34.6, 31.5, 19.9. HRMS-ESI (m/z): calcd for C<sub>19</sub>H<sub>26</sub>NO, [M+H]: 284.2014, found 284.2027.

***O*-benzyl-*N*-(1-(3-methoxyphenyl)ethyl)hydroxylamine (2d):**

Yield: 52.7 mg (82%), colorless oil. <sup>1</sup>H NMR (400 MHz, CDCl<sub>3</sub>) δ 7.38-7.16 (m, 6H), 6.93 (d, *J* = 12.5 Hz, 2H), 6.80 (d, *J* = 8.1 Hz, 1H), 5.61 (s, 1H), 4.63 (q, *J* = 11.5 Hz, 2H), 4.13 (q, *J* = 6.5 Hz, 1H), 3.78 (s, 3H), 1.33 (d, *J* = 6.6 Hz, 3H). <sup>13</sup>C NMR (100 MHz, CDCl<sub>3</sub>) δ 159.7, 144.7, 137.9, 129.4, 128.5, 128.4, 127.8, 119.6, 112.9, 112.8, 76.8, 60.7, 55.2, 20.0. HRMS-ESI (m/z): calcd for C<sub>16</sub>H<sub>20</sub>NO, [M+H]: 258.1494, found 258.1492.

***O*-benzyl-*N*-(1-(4-isopropylphenyl)ethyl)hydroxylamine (2e):**

Yield: 61.2 mg (91%), colorless oil. <sup>1</sup>H NMR (400 MHz, CDCl<sub>3</sub>) δ 7.38-7.20 (m, 7H), 7.18 (d, *J* = 8.1 Hz, 2H), 5.58 (s, 1H), 4.63 (dd, *J* = 26.5, 11.4 Hz, 2H), 4.13 (q, *J* = 6.6 Hz, 1H), 2.88 (dt, *J* = 13.8, 6.9 Hz, 1H), 1.36 (d, *J* = 6.6 Hz, 3H), 1.24 (d, *J* = 6.9 Hz, 6H). <sup>13</sup>C NMR (100 MHz, CDCl<sub>3</sub>) δ 148.1, 140.1, 138.0, 128.6, 128.4, 127.8, 127.3, 126.5, 76.9, 60.4, 33.9, 24.2, 20.0. HRMS-ESI (m/z): calcd for C<sub>18</sub>H<sub>24</sub>NO, [M+H]: 270.1858, found 270.1851.

***O*-benzyl-*N*-(1-(4-chlorophenyl)ethyl)hydroxylamine (2f):**

Yield: 34.4 mg (57%), colorless oil. <sup>1</sup>H NMR (400 MHz, CDCl<sub>3</sub>) δ 7.43-7.14 (m, 9H), 5.57 (s, 1H), 4.58 (q, *J* = 11.5 Hz, 2H), 4.13 (q, *J* = 6.7 Hz, 1H), 1.30 (d, *J* = 6.7 Hz, 3H). <sup>13</sup>C NMR (100 MHz, CDCl<sub>3</sub>) δ 141.7, 137.7, 133.0, 128.6, 128.5, 128.5, 128.4, 127.9, 76.8, 60.0, 19.9. HRMS-ESI (m/z): calcd for C<sub>15</sub>H<sub>16</sub>ClNO, [M+H]: 262.0999, found 262.0998.

***O*-benzyl-*N*-(1-(4-bromophenyl)ethyl)hydroxylamine (2g):**

Yield: 41.9 mg (55%), colorless oil. <sup>1</sup>H NMR (400 MHz, CDCl<sub>3</sub>) δ 7.44 (d, *J* = 8.4 Hz, 2H), 7.37 – 7.10 (m, 7H), 5.56 (s, 1H), 4.58 (q, *J* = 11.5 Hz, 2H), 4.11 (q, *J* = 6.7 Hz, 1H), 1.30 (d, *J* = 6.7 Hz, 3H). <sup>13</sup>C NMR (100 MHz, CDCl<sub>3</sub>) δ 142.2, 137.7, 131.5, 129.0, 128.5, 128.4, 127.9, 121.1, 76.8, 60.0, 19.9. HRMS-ESI (m/z): calcd for C<sub>15</sub>H<sub>17</sub>BrNO, [M+H]: 306.0494, found 306.0493.

***O*-benzyl-*N*-(1-(3-(trifluoromethyl)phenyl)ethyl)hydroxylamine (2h):**

Yield: 34.0 mg (46%), yellow oil. <sup>1</sup>H NMR (400 MHz, CDCl<sub>3</sub>) δ 7.64 (s, 1H), 7.54 (t, *J* = 7.0 Hz, 2H), 7.44 (t, *J* = 7.6 Hz, 1H), 7.34-7.20 (m, 5H), 5.62 (s, 1H), 4.58 (q, *J* = 11.4 Hz, 2H), 4.22 (q, *J* = 6.5 Hz, 1H), 1.34 (d, *J* = 6.7 Hz, 3H). <sup>13</sup>C NMR (100 MHz, CDCl<sub>3</sub>) δ 144.3, 137.5, 130.6, 128.8, 128.5, 128.4, 127.9, 124.2, (q, *J* = 270 Hz), 124.2 (q, *J* = 4 Hz), 124.0 (q, *J* = 4 Hz), 76.7, 60.2, 19.9. HRMS-ESI (m/z): calcd for C<sub>16</sub>H<sub>17</sub>F<sub>3</sub>NO, [M+H]: 296.1262, found 296.1268.

***O*-benzyl-*N*-(1-(2-fluorophenyl)ethyl)hydroxylamine (2i):**

Yield: 33.1 mg (54%), yellow oil. <sup>1</sup>H NMR (400 MHz, CDCl<sub>3</sub>) δ 7.42 (t, *J* = 7.4 Hz, 1H), 7.36-7.16 (m, 6H), 7.11 (t, *J* = 7.5 Hz, 1H), 7.05-6.98 (m, 1H), 5.68 (s, 1H), 4.72-4.59 (m, 2H), 4.52 (q, *J* = 6.6 Hz, 1H), 1.36 (d, *J* = 6.7 Hz, 3H). <sup>13</sup>C NMR (100 MHz, CDCl<sub>3</sub>) δ 162.8 (d, *J* = 246 Hz), 137.8, 129.9 (d, *J* = 13 Hz), 128.6 (d, *J* = 8 Hz), 128.4 (d, *J* = 8 Hz), 128.2, 127.8, 124.1 (d, *J* = 4 Hz), 115.5 (d, *J* = 22 Hz), 76.6, 53.8 (d, *J* = 2 Hz), 18.7. HRMS-ESI (*m/z*): calcd for C<sub>15</sub>H<sub>17</sub>FNO, [M+H]: 246.1294, found 246.1301.

***O*-benzyl-*N*-(1-(3,5-dimethylphenyl)ethyl)hydroxylamine (2j):**

Yield: 59.3 mg (93%), colorless oil. <sup>1</sup>H NMR (400 MHz, CDCl<sub>3</sub>) δ 7.29 (d, *J* = 9.9 Hz, 5H), 6.95 (s, 2H), 6.89 (s, 1H), 5.58 (s, 1H), 4.64 (dd, *J* = 25.8, 11.5 Hz, 2H), 4.09 (q, *J* = 6.5 Hz, 1H), 2.30 (s, 6H), 1.34 (d, *J* = 6.6 Hz, 3H). <sup>13</sup>C NMR (100 MHz, CDCl<sub>3</sub>) δ 142.7, 138.0, 137.9, 129.2, 128.6, 128.4, 127.8, 125.1, 76.8, 60.7, 21.4, 20.0. HRMS-ESI (*m/z*): calcd for C<sub>17</sub>H<sub>22</sub>NO, [M+H]: 256.1701, found 26.1691.

***O*-benzyl-*N*-(1-(4-fluoro-3-methoxyphenyl)ethyl)hydroxylamine (2k):**

Yield: 44.0 mg (64%), yellow oil. <sup>1</sup>H NMR (400 MHz, CDCl<sub>3</sub>) δ 7.29 (dt, *J* = 18.7, 6.9 Hz, 5H), 7.07 (dd, *J* = 26.4, 10.4 Hz, 2H), 6.90 (t, *J* = 8.4 Hz, 1H), 5.55 (s, 1H), 4.60 (q, *J* = 11.5 Hz, 2H), 4.15-4.04 (m, 1H), 3.87 (s, 3H), 1.30 (d, *J* = 6.6 Hz, 3H). <sup>13</sup>C NMR (100 MHz, CDCl<sub>3</sub>) δ 153.2 (d, *J* = 244 Hz), 146.8 (d, *J* = 10 Hz), 137.8, 136.2 (d, *J* = 6 Hz), 128.5, 128.4, 127.8, 122.9 (d, *J* = 3 Hz), 114.9 (d, *J* = 19 Hz), 113.2, 76.8, 59.7, 56.3, 19.9. HRMS-ESI (*m/z*): calcd for C<sub>16</sub>H<sub>19</sub>FN<sub>2</sub>O, [M+H]: 276.1400, found 286.1396.

***O*-benzyl-*N*-(1-(naphthalen-2-yl)ethyl)hydroxylamine (2l):**

Yield: 65.1 mg (94%), light yellow solid, mp: 101-102°C. <sup>1</sup>H NMR (400 MHz, CDCl<sub>3</sub>) δ 7.78 (dd, *J* = 9.2, 4.9 Hz, 4H), 7.55-7.38 (m, 3H), 7.35-7.13 (m, 5H), 5.68 (s, 1H), 4.61 (dt, *J* = 15.8, 9.3 Hz, 2H), 4.38-4.25 (m, 1H), 1.54-1.34 (m, 3H). <sup>13</sup>C NMR (100 MHz, CDCl<sub>3</sub>) δ 140.6, 138.0, 133.5, 133.1, 128.6, 128.4, 128.2, 128.0, 127.9, 127.8, 126.2, 126.1, 125.8, 125.5, 76.9, 60.8, 20.1. HRMS-ESI (*m/z*): calcd for C<sub>19</sub>H<sub>20</sub>NO, [M+H]: 278.1454, found 278.1551.

***O*-benzyl-*N*-(1-(6-methylpyridin-2-yl)ethyl)hydroxylamine (2m):**

Yield: 36.2 mg (61%), colorless oil. <sup>1</sup>H NMR (400 MHz, CDCl<sub>3</sub>) δ 7.51 (t, *J* = 7.6 Hz, 1H), 7.35-7.23 (m, 5H), 7.09 (d, *J* = 7.6 Hz, 1H), 7.00 (d, *J* = 7.6 Hz, 1H), 6.21 (s, 1H), 4.67 (dd, *J* = 11.4, 3.9 Hz, 2H), 4.21 (q, *J* = 6.7 Hz, 1H), 2.53 (s, 3H), 1.33 (d, *J* = 6.8 Hz, 3H). <sup>13</sup>C NMR (100 MHz, CDCl<sub>3</sub>) δ 161.7, 158.0, 138.1, 136.7, 128.3, 128.3, 127.7, 121.8, 118.4, 76.3, 61.4, 24.5, 18.7. HRMS-ESI (*m/z*): calcd for C<sub>15</sub>H<sub>19</sub>N<sub>2</sub>O, [M+H]: 243.1497, found 243.1504.

***O*-benzyl-*N*-(1-(thiophen-2-yl)ethyl)hydroxylamine (2n):**

Yield: 28.0 mg (48%), colorless oil. <sup>1</sup>H NMR (400 MHz, CDCl<sub>3</sub>) δ 7.43-7.24 (m, 5H), 7.21 (d, *J* = 5.0 Hz, 1H), 7.05-6.86 (m, 2H), 5.57 (s, 1H), 4.78-4.62 (m, 2H), 4.43 (q, *J* = 6.6 Hz, 1H), 1.46 (d, *J* = 6.6 Hz, 3H). <sup>13</sup>C NMR (100 MHz, CDCl<sub>3</sub>) δ 146.4, 137.7, 128.6, 128.4, 127.9, 126.5, 124.5, 124.4, 76.8, 56.4, 20.6. HRMS-ESI (*m/z*): calcd for C<sub>13</sub>H<sub>16</sub>NOS, [M+H]: 243.0953, found 243.0942.

***O*-benzyl-*N*-(2,3-dihydro-1H-inden-1-yl)hydroxylamine (2o):**

Yield: 50.2 mg (84%), colorless oil. <sup>1</sup>H NMR (400 MHz, CDCl<sub>3</sub>) δ 7.41 (d, *J* = 7.2 Hz, 1H), 7.36-7.26 (m, 5H), 7.20 (dd, *J* = 16.4, 5.7 Hz, 3H), 5.59 (s, 1H), 4.71 (s, 2H), 4.64-4.57 (m, 1H), 3.01 (dd, *J* =

15.6, 7.6 Hz, 1H), 2.89-2.76 (m, 1H), 2.29 (dd,  $J = 13.9, 7.0$  Hz, 1H), 2.08-1.95 (m, 1H).  $^{13}\text{C}$  NMR (100 MHz,  $\text{CDCl}_3$ )  $\delta$  144.6, 142.3, 138.0, 128.5, 128.4, 128.1, 127.8, 126.4, 125.2, 124.9, 76.6, 65.9, 30.5, 30.5. HRMS-ESI ( $m/z$ ): calcd for  $\text{C}_{16}\text{H}_{18}\text{NO}$ ,  $[\text{M}+\text{H}]$ : 240.1388, found 240.1382.

***O*-benzyl-*N*-(7-fluoro-2,3-dihydro-1H-inden-1-yl)hydroxylamine (2p):**

Yield: 47.6 mg (74%), yellow oil.  $^1\text{H}$  NMR (400 MHz,  $\text{CDCl}_3$ )  $\delta$  7.34-7.24 (m, 5H), 7.18 (td,  $J = 7.9, 5.5$  Hz, 1H), 7.00 (d,  $J = 7.4$  Hz, 1H), 6.83 (t,  $J = 8.8$  Hz, 1H), 5.88 (s, 1H), 4.80 (dd,  $J = 6.7, 3.7$  Hz, 1H), 4.70 (s, 2H), 3.09 (dt,  $J = 16.2, 8.1$  Hz, 1H), 2.83 (ddd,  $J = 16.2, 8.2, 4.6$  Hz, 1H), 2.29-2.15 (m, 2H).  $^{13}\text{C}$  NMR (100 MHz,  $\text{CDCl}_3$ )  $\delta$  160.1 (d,  $J = 246$  Hz), 148.8 (d,  $J = 5$  Hz), 137.8, 130.1 (d,  $J = 7$  Hz), 128.5, 128.4, 127.9, 127.7 (d,  $J = 16$  Hz), 120.7 (d,  $J = 3$  Hz), 113.1 (d,  $J = 21$  Hz), 76.8, 63.6, 31.1 (d,  $J = 1$  Hz), 30.4. HRMS-ESI ( $m/z$ ): calcd for  $\text{C}_{16}\text{H}_{17}\text{FNO}$ ,  $[\text{M}+\text{H}]$ : 258.1294, found 258.1303.

***O*-benzyl-*N*-(5-fluoro-2,3-dihydro-1H-inden-1-yl)hydroxylamine (2q):**

Yield: 51.4 mg (80%), yellow oil.  $^1\text{H}$  NMR (400 MHz,  $\text{CDCl}_3$ )  $\delta$  7.41-7.25 (m, 6H), 7.00-6.78 (m, 2H), 5.55 (s, 1H), 4.69 (s, 2H), 4.54 (dd,  $J = 7.1, 4.5$  Hz, 1H), 3.08-2.94 (m, 1H), 2.88-2.74 (m, 1H), 2.31 (ddt,  $J = 13.7, 8.7, 7.0$  Hz, 1H), 2.04 (ddd,  $J = 13.4, 9.1, 4.8$  Hz, 1H).  $^{13}\text{C}$  NMR (100 MHz,  $\text{CDCl}_3$ )  $\delta$  164.1 (d,  $J = 243$  Hz), 146.9 (d,  $J = 8$  Hz), 138.0 (d,  $J = 2$  Hz), 137.8, 128.5, 128.4, 127.9, 126.2 (d,  $J = 9$  Hz), 113.3 (d,  $J = 22$  Hz), 111.7 (d,  $J = 22$  Hz), 76.6, 65.0, 30.6 (d,  $J = 11$  Hz). HRMS-ESI ( $m/z$ ): calcd for  $\text{C}_{16}\text{H}_{17}\text{FNO}$ ,  $[\text{M}+\text{H}]$ : 258.1294, found 258.1290.

***O*-benzyl-*N*-(6-methyl-2,3-dihydro-1H-inden-1-yl)hydroxylamine (2r):**

Yield: 55.7 mg (88%), colorless oil.  $^1\text{H}$  NMR (400 MHz,  $\text{CDCl}_3$ )  $\delta$  7.42-7.20 (m, 5H), 7.19 (s, 1H), 7.09 (d,  $J = 7.6$  Hz, 1H), 7.01 (d,  $J = 7.5$  Hz, 1H), 5.53 (s, 1H), 4.69 (s, 2H), 4.57-4.49 (m, 1H), 3.01-2.85 (m, 1H), 2.81-2.66 (m, 1H), 2.32-2.15 (m, 4H), 2.03-1.94 (m, 1H).  $^{13}\text{C}$  NMR (100 MHz,  $\text{CDCl}_3$ )  $\delta$  142.5, 141.6, 138.2, 136.0, 129.0, 128.6, 128.5, 127.9, 125.8, 124.7, 76.7, 66.0, 30.9, 30.2, 21.4. HRMS-ESI ( $m/z$ ): calcd for  $\text{C}_{17}\text{H}_{20}\text{NO}$ ,  $[\text{M}+\text{H}]$ : 254.1545, found 254.1552.

***O*-benzyl-*N*-(1,2,3,4-tetrahydronaphthalen-1-yl)hydroxylamine (2s):**

Yield: 55.7 mg (88%), colorless oil.  $^1\text{H}$  NMR (400 MHz,  $\text{CDCl}_3$ )  $\delta$  7.46-7.22 (m, 6H), 7.18-7.04 (m, 3H), 5.50 (s, 1H), 4.83-4.64 (m, 2H), 4.13 (t,  $J = 3.9$  Hz, 1H), 2.85-2.62 (m, 2H), 2.17 (ddt,  $J = 13.1, 6.3, 3.3$  Hz, 1H), 2.05-1.90 (m, 1H), 1.84-1.65 (m, 2H).  $^{13}\text{C}$  NMR (100 MHz,  $\text{CDCl}_3$ )  $\delta$  138.7, 138.1, 134.7, 129.8, 129.3, 128.6, 128.4, 127.9, 127.4, 125.8, 76.8, 58.1, 29.5, 26.4, 18.3. HRMS-ESI ( $m/z$ ): calcd for  $\text{C}_{17}\text{H}_{20}\text{NO}$ ,  $[\text{M}+\text{H}]$ : 258.1545, found 254.1557.

***O*-methyl-*N*-(1,2,3,4-tetrahydronaphthalen-1-yl)hydroxylamine (2t):**

Yield: 34.6 mg (78%), colorless oil.  $^1\text{H}$  NMR (400 MHz,  $\text{CDCl}_3$ )  $\delta$  7.37-7.25 (m, 1H), 7.22-6.97 (m, 3H), 5.51 (s, 1H), 4.11 (d,  $J = 3.1$  Hz, 1H), 3.57 (d,  $J = 3.0$  Hz, 3H), 2.87-2.64 (m, 2H), 2.19-2.08 (m, 1H), 2.07-1.92 (m, 1H), 1.85-1.69 (m, 2H).  $^{13}\text{C}$  NMR (100 MHz,  $\text{CDCl}_3$ )  $\delta$  138.5, 134.7, 129.6, 129.3, 127.4, 125.8, 62.4, 57.9, 29.5, 26.3, 18.3. HRMS-ESI ( $m/z$ ): calcd for  $\text{C}_{11}\text{H}_{16}\text{NO}$ ,  $[\text{M}+\text{H}]$ : 178.1232, found 178.1238.

***O*-benzyl-*N*-(7-methoxy-1,2,3,4-tetrahydronaphthalen-1-yl)hydroxylamine (2v):**

Yield: 65.1 mg (92%), yellow oil.  $^1\text{H}$  NMR (400 MHz,  $\text{CDCl}_3$ )  $\delta$  7.32 (ddd,  $J = 22.1, 9.8, 4.8$  Hz, 5H), 6.97 (d,  $J = 8.4$  Hz, 1H), 6.84 (d,  $J = 2.6$  Hz, 1H), 6.73 (dd,  $J = 8.4, 2.7$  Hz, 1H), 5.50 (s, 1H), 4.73 (q,  $J$

= 11.6 Hz, 2H), 4.08 (t,  $J = 4.2$  Hz, 1H), 3.73 (s, 3H), 2.78-2.53 (m, 2H), 2.11 (dtd,  $J = 9.4, 6.2, 3.2$  Hz, 1H), 1.99-1.87 (m, 1H), 1.83-1.62 (m, 2H).  $^{13}\text{C}$  NMR (100 MHz,  $\text{CDCl}_3$ )  $\delta$  157.7, 138.1, 135.8, 130.6, 130.1, 128.7, 128.1, 127.9, 114.2, 114.0, 76.8, 58.4, 55.3, 28.7, 26.6, 18.7. HRMS-ESI ( $m/z$ ): calcd for  $\text{C}_{18}\text{H}_{22}\text{NO}_2$ ,  $[\text{M}+\text{H}]$ : 284.1651, found 284.1648.

***O*-benzyl-*N*-(6-chloro-1,2,3,4-tetrahydronaphthalen-1-yl)hydroxylamine (2w):**

Yield: 45.2 mg (63%), colorless oil.  $^1\text{H}$  NMR (400 MHz,  $\text{CDCl}_3$ )  $\delta$  7.49-7.24 (m, 5H), 7.24-7.18 (m, 1H), 7.08 (dd,  $J = 10.8, 2.5$  Hz, 2H), 5.44 (s, 1H), 4.86-4.56 (m, 2H), 4.07 (t,  $J = 4.1$  Hz, 1H), 2.83-2.57 (m, 2H), 2.13 (ddd,  $J = 13.6, 6.3, 3.2$  Hz, 1H), 1.99-1.85 (m, 1H), 1.81-1.63 (m, 2H).  $^{13}\text{C}$  NMR (100 MHz,  $\text{CDCl}_3$ )  $\delta$  140.5, 137.9, 133.4, 132.9, 131.2, 128.9, 128.6, 128.4, 127.9, 126.0, 76.8, 57.5, 29.4, 26.3, 18.1. HRMS-ESI ( $m/z$ ): calcd for  $\text{C}_{17}\text{H}_{19}\text{ClNO}$ ,  $[\text{M}+\text{H}]$ : 288.1155, found 288.1144.

***O*-benzyl-*N*-(1-phenylbutyl)hydroxylamine (2x):**

Yield: 40.8 mg (64%), light yellow oil.  $^1\text{H}$  NMR (400 MHz,  $\text{CDCl}_3$ )  $\delta$  7.41-7.17 (m, 10H), 5.65 (s, 1H), 4.56 (ddd,  $J = 28.3, 11.4, 3.4$  Hz, 2H), 4.02-3.93 (m, 1H), 1.73 (td,  $J = 9.6, 5.0$  Hz, 1H), 1.63-1.52 (m, 1H), 1.28-1.15 (m, 2H), 0.85 (td,  $J = 7.3, 3.6$  Hz, 3H).  $^{13}\text{C}$  NMR (100 MHz,  $\text{CDCl}_3$ )  $\delta$  142.2, 138.0, 128.6, 128.439, 128.4, 127.9, 127.8, 127.4, 76.8, 65.8, 36.0, 19.5, 14.2.

***O*-methyl-*N*-(phenyl(*p*-tolyl)methyl)hydroxylamine (2y):**

Yield: 14.8 mg (26%), light yellow oil.  $^1\text{H}$  NMR (400 MHz,  $\text{CDCl}_3$ )  $\delta$  7.39 (d,  $J = 7.9$  Hz, 2H), 7.26 (dtd,  $J = 14.5, 7.6, 1.1$  Hz, 5H), 7.12 (d,  $J = 7.8$  Hz, 2H), 5.84 (s, 1H), 5.18 (s, 1H), 3.50 (d,  $J = 1.2$  Hz, 3H), 2.30 (s, 3H).  $^{13}\text{C}$  NMR (100 Hz,  $\text{CDCl}_3$ )  $\delta$  141.4, 138.1, 137.2, 129.3, 128.5, 127.7, 127.6, 127.4, 69.1, 62.4, 21.2. HRMS-ESI ( $m/z$ ): calcd for  $\text{C}_{15}\text{H}_{18}\text{NO}$ ,  $[\text{M}+\text{H}]$ : 228.1388, found 228.1398.

***N*-(1-phenylethyl)hydroxylamine (2ba):**

Yield: 24.0 mg (70%), light yellow solid, mp: 63-65°C.  $^1\text{H}$  NMR (400 MHz,  $\text{CDCl}_3$ )  $\delta$  7.40-7.13 (m, 5H), 5.81 (s, 2H), 4.08 (q,  $J = 6.6$  Hz, 1H), 1.37 (d,  $J = 6.6$  Hz, 3H).  $^{13}\text{C}$  NMR (100 MHz,  $\text{CDCl}_3$ )  $\delta$  142.1, 128.6, 127.7, 127.3, 76.8, 61.8, 19.3. HRMS-ESI ( $m/z$ ): calcd for  $\text{C}_8\text{H}_{12}\text{NO}$ ,  $[\text{M}+\text{H}]$ : 138.0919, found 138.0910.

***N*-(1-(4-fluorophenyl)ethyl)hydroxylamine (2bb)<sup>24</sup>**

Yield: 34.9 mg (90%), light yellow oil.  $^1\text{H}$  NMR (400 MHz,  $\text{CDCl}_3$ )  $\delta$  7.33-7.20 (m, 2H), 7.08-6.89 (m, 2H), 5.72 (s, 2H), 4.07 (q,  $J = 6.7$  Hz, 1H), 1.35 (d,  $J = 6.7$  Hz, 3H).  $^{13}\text{C}$  NMR (100 MHz,  $\text{CDCl}_3$ )  $\delta$  162.2 (d,  $J = 244$  Hz), 138.0 (d,  $J = 3$  Hz), 128.8 (d,  $J = 8$  Hz), 115.4 (d,  $J = 21$  Hz), 61.1, 19.4.

***N*-(1-(4-chlorophenyl)ethyl)hydroxylamine (2bc)<sup>25</sup>**

Yield: 35.9 mg (84%), white solid, mp: 68-73°C.  $^1\text{H}$  NMR (400 MHz,  $\text{CDCl}_3$ )  $\delta$  7.28 (dd,  $J = 22.2, 8.4$  Hz, 4H), 5.34 (s, 2H), 4.07 (dd,  $J = 13.3, 6.6$  Hz, 1H), 1.34 (d,  $J = 6.7$  Hz, 3H).  $^{13}\text{C}$  NMR (100 MHz,  $\text{CDCl}_3$ )  $\delta$  140.8, 133.3, 128.7, 128.6, 61.1, 19.3.

***N*-(1-(*p*-tolyl)ethyl)hydroxylamine (2bd)<sup>24</sup>**

Yield: 33.6 mg (89%), white solid, mp: 66-72°C. <sup>1</sup>H NMR (400 MHz, CDCl<sub>3</sub>) δ 7.19 (d, *J* = 8.0 Hz, 2H), 7.13 (d, *J* = 7.8 Hz, 2H), 5.85 (s, 2H), 4.04 (q, *J* = 6.6 Hz, 1H), 2.32 (s, 3H), 1.36 (d, *J* = 6.7 Hz, 3H). <sup>13</sup>C NMR (100 MHz, CDCl<sub>3</sub>) δ 139.1, 137.4, 129.3, 127.2, 61.5, 21.2, 19.3.

***N*-(1-(4-(*tert*-butyl)phenyl)ethyl)hydroxylamine (2be)**

Yield: 38.1 mg (79%), yellow oil. <sup>1</sup>H NMR (400 MHz, CDCl<sub>3</sub>) δ 7.35 (d, *J* = 8.3 Hz, 2H), 7.24 (d, *J* = 8.3 Hz, 2H), 5.04 (s, 2H), 4.07 (q, *J* = 6.6 Hz, 1H), 1.38 (d, *J* = 6.7 Hz, 3H), 1.30 (s, 9H). <sup>13</sup>C NMR (100 MHz, CDCl<sub>3</sub>) δ 150.6, 138.9, 126.94, 125.5, 61.4, 34.5, 31.4, 19.1. HRMS-ESI (*m/z*): calcd for C<sub>12</sub>H<sub>20</sub>NO, [*M*+*H*]: 194.1545, found 194.1541.

***N*-(1-(naphthalen-2-yl)ethyl)hydroxylamine (2bf)<sup>26</sup>**

Yield: 40.7 mg (87%), yellow oil. <sup>1</sup>H NMR (400 MHz, CDCl<sub>3</sub>) δ 8.02-7.73 (m, 4H), 7.62-7.35 (m, 3H), 5.14 (s, 2H), 4.24 (dd, *J* = 13.2, 6.6 Hz, 1H), 1.43 (d, *J* = 6.6 Hz, 3H). <sup>13</sup>C NMR (100 MHz, CDCl<sub>3</sub>) δ 139.7, 133.4, 133.0, 128.3, 127.9, 127.7, 126.2, 126.1, 125.9, 125.1, 61.9, 19.4.

***N*-(1-(furan-2-yl)ethyl)hydroxylamine (2bg)<sup>29</sup>**

Yield: 8.3 mg (26%), light yellow oil. <sup>1</sup>H NMR (400 MHz, CDCl<sub>3</sub>) δ 7.45-7.31 (m, 1H), 6.41-6.29 (m, 1H), 6.28-6.17 (m, 1H), 5.30 (s, 2H), 4.17 (q, *J* = 6.8 Hz, 1H), 1.43 (d, *J* = 6.8 Hz, 3H). <sup>13</sup>C NMR (100 MHz, CDCl<sub>3</sub>) δ 154.9, 141.9, 110.2, 106.8, 55.2, 16.2.

***N,O*-dibenzylhydroxylamine (2bh):**

Yield: 16.0 mg (30%), colorless oil. <sup>1</sup>H NMR (400 MHz, CDCl<sub>3</sub>) δ 7.45-7.18 (m, 10H), 5.72 (s, 1H), 4.66 (s, 2H), 4.05 (s, 2H). <sup>13</sup>C NMR (100 MHz, CDCl<sub>3</sub>) δ 137.9, 137.6, 129.0, 128.5, 128.4, 128.4, 127.8, 127.5, 76.3, 56.6. HRMS-ESI (*m/z*): calcd for C<sub>14</sub>H<sub>16</sub>NO, [*M*+*H*]: 214.1232, found 214.1242.

***O*-benzyl-*N*-(4-fluorobenzyl)hydroxylamine (2bi):**

Yield: 11.6 mg (20%), yellow oil. <sup>1</sup>H NMR (400 MHz, CDCl<sub>3</sub>) δ 7.31 (dt, *J* = 12.1, 4.2 Hz, 7H), 7.00 (t, *J* = 8.5 Hz, 2H), 5.68 (s, 1H), 4.62 (s, 2H), 4.00 (s, 2H). <sup>13</sup>C NMR (100 MHz, CDCl<sub>3</sub>) δ 162.3 (d, *J* = 244 Hz), 137.8, 133.5 (d, *J* = 3 Hz), 130.6 (d, *J* = 8 Hz), 128.5, 128.4, 127.9, 115.2 (d, *J* = 21 Hz), 76.4, 55.7. HRMS-ESI (*m/z*): calcd for C<sub>14</sub>H<sub>15</sub>FNO, [*M*+*H*]: 232.1138, found 238.1141.

***O*-benzyl-*N*-(4-methylbenzyl)hydroxylamine (2bj):**

Yield: 14.2 mg (25%), colorless oil. <sup>1</sup>H NMR (400 MHz, CDCl<sub>3</sub>) δ 7.44-7.26 (m, 5H), 7.26-7.20 (m, 2H), 7.14 (d, *J* = 7.7 Hz, 2H), 5.68 (s, 1H), 4.66 (s, 2H), 4.01 (s, 2H), 2.34 (s, 3H). <sup>13</sup>C NMR (100 MHz, CDCl<sub>3</sub>) δ 137.9, 137.1, 134.5, 129.1, 128.9, 128.5, 128.4, 127.8, 76.3, 56.3, 21.2. HRMS-ESI (*m/z*): calcd for C<sub>15</sub>H<sub>18</sub>NO, [*M*+*H*]: 228.1388, found 228.1388.

***O*-benzyl-*N*-(naphthalen-2-ylmethyl)hydroxylamine (2bk):**

Yield: 20.4 mg (31%), light yellow solid, mp: 61-63°C. <sup>1</sup>H NMR (400 MHz, CDCl<sub>3</sub>) δ 7.96-7.70 (m, 4H), 7.47 (dd, *J* = 11.3, 6.7 Hz, 3H), 7.38-7.24 (m, 5H), 5.82 (s, 1H), 4.66 (s, 2H), 4.21 (s, 2H). <sup>13</sup>C NMR (100 MHz, CDCl<sub>3</sub>) δ 137.9, 135.2, 133.4, 132.9, 128.5, 128.4, 128.1, 127.8, 127.8, 127.7, 127.1, 126.1, 125.8, 76.4, 56.7. HRMS-ESI (*m/z*): calcd for C<sub>18</sub>H<sub>18</sub>NO, [*M*+*H*]: 264.1388, found 264.1391.

***O*-benzyl-*N*-(furan-2-ylmethyl)hydroxylamine (2bl):**

Yield: 12.2 mg (22%), colorless oil. <sup>1</sup>H NMR (400 MHz, CDCl<sub>3</sub>) δ 7.46-7.10 (m, 6H), 6.48-6.13 (m, 2H), 5.41 (d, *J* = 234.9 Hz, 1H), 4.67 (s, 2H), 4.05 (s, 2H). <sup>13</sup>C NMR (100 MHz, CDCl<sub>3</sub>) δ 151.6, 142.1, 137.8, 128.4, 128.4, 127.9, 110.4, 108.3, 76.3, 49.0. HRMS-ESI (m/z): calcd for C<sub>12</sub>H<sub>14</sub>NO<sub>2</sub>, [M+H]: 204.1025, found 204.1011.

***O*-benzyl-*N*-isopropylhydroxylamine (2aa):**

Yield: 21.5 mg (52%), colorless oil <sup>1</sup>H NMR (400 MHz, CDCl<sub>3</sub>) δ 7.39-7.26 (m, 5H), 5.93-4.93 (m, 1H), 4.72 (s, 2H), 3.20 (dt, *J* = 12.6, 6.3 Hz, 1H), 1.07 (d, *J* = 6.3 Hz, 6H). <sup>13</sup>C NMR (100 MHz, CDCl<sub>3</sub>) δ 138.0, 128.4, 128.4, 127.8, 76.8, 51.7, 20.2. HRMS-ESI (m/z): calcd for C<sub>10</sub>H<sub>16</sub>NO, [M+H]: 166.1232, found 166.1243.

***O*-benzyl-*N*-(3,3-dimethylbutan-2-yl)hydroxylamine (2ab):**

Yield: 7.8 mg (15%), colorless oil. <sup>1</sup>H NMR (400 MHz, CDCl<sub>3</sub>) δ 7.39-7.24 (m, 5H), 5.42 (s, 1H), 4.67 (s, 2H), 2.87-2.70 (m, 1H), 1.09 (d, *J* = 6.4 Hz, 3H), 0.89 (s, 9H). <sup>13</sup>C NMR (100 MHz, CDCl<sub>3</sub>) δ 138.1, 128.5, 128.3, 127.7, 76.3, 64.3, 33.2, 26.8, 13.9. HRMS-ESI (m/z): calcd for C<sub>13</sub>H<sub>22</sub>NO, [M+H]: 208.1701, found 208.1709.

***O*-benzyl-*N*-(pentan-3-yl)hydroxylamine (2ac):**

Yield: 35.7 mg (74%), colorless oil. <sup>1</sup>H NMR (400 MHz, CDCl<sub>3</sub>) δ 7.37-7.25 (m, 5H), 5.96-5.03 (m, 1H), 4.69 (s, 2H), 2.77-2.68 (m, 1H), 1.52-1.42 (m, 4H), 0.89 (t, *J* = 7.5 Hz, 6H). <sup>13</sup>C NMR (100 MHz, CDCl<sub>3</sub>) δ 138.2, 128.4, 128.4, 127.8, 76.6, 63.2, 24.0, 10.2.

***O*-benzyl-*N*-(pentan-2-yl)hydroxylamine (2ad):**

Yield: 41.5 mg (86%), colorless oil. <sup>1</sup>H NMR (400 MHz, CDCl<sub>3</sub>) δ 7.38-7.21 (m, 5H), 5.30 (s, 1H), 4.70 (s, 2H), 3.03 (dt, *J* = 12.3, 6.2 Hz, 1H), 1.52-1.44 (m, 1H), 1.39-1.19 (m, 4H), 1.06 (d, *J* = 6.4 Hz, 3H), 0.90 (t, *J* = 7.1 Hz, 3H). <sup>13</sup>C NMR (100 MHz, CDCl<sub>3</sub>) δ 138.1, 128.4, 127.8, 76.8, 56.0, 36.3, 19.2, 18.3, 14.3.

***O*-benzyl-*N*-cyclohexylhydroxylamine (2af):**

Yield: 48.8 mg (95%), colorless oil. <sup>1</sup>H NMR (400 MHz, CDCl<sub>3</sub>) δ 7.50-7.18 (m, 5H), 5.06 (d, *J* = 112.2 Hz, 1H), 4.70 (s, 2H), 2.88 (t, *J* = 10.3 Hz, 1H), 1.88 (d, *J* = 11.5 Hz, 2H), 1.74 (d, *J* = 12.4 Hz, 2H), 1.62 (d, *J* = 12.0 Hz, 1H), 1.30-1.05 (m, 5H). <sup>13</sup>C NMR (100 MHz, CDCl<sub>3</sub>) δ 138.0, 128.4, 128.4, 127.8, 76.8, 59.5, 30.7, 26.2, 24.7. HRMS-ESI (m/z): calcd for C<sub>13</sub>H<sub>20</sub>NO, [M+H]: 206.1545, found 206.1553.

***O*-benzyl-*N*-(5-methoxy-1,2,3,4-tetrahydronaphthalen-1-yl)hydroxylamine (2ag):**

Yield: 48.2 mg (68%), colorless oil. <sup>1</sup>H NMR (400 MHz, CDCl<sub>3</sub>) δ 7.47-7.26 (m, 5H), 7.09 (t, *J* = 7.9 Hz, 1H), 6.68 (dd, *J* = 17.1, 7.9 Hz, 2H), 5.56 (s, 1H), 4.76 (s, 2H), 3.81 (s, 3H), 3.40-3.30 (m, 1H), 3.03-2.84 (m, 2H), 2.70-2.53 (m, 2H), 1.61 (dtd, *J* = 12.8, 10.4, 6.0 Hz, 2H). <sup>13</sup>C NMR (100 MHz, CDCl<sub>3</sub>) δ 157.1, 137.9, 136.1, 128.4, 128.4, 127.9, 126.3, 125.1, 121.6, 107.1, 76.7, 55.9, 55.3, 33.7, 26.5, 21.7. HRMS-ESI (m/z): calcd for C<sub>18</sub>H<sub>22</sub>NO<sub>2</sub>, [M+H]: 284.1651, found 284.1648.

***N*-cyclohexyl-*O*-methylhydroxylamine (2ah):**

Yield: 29.4 mg (91%), colorless oil. <sup>1</sup>H NMR (400 MHz, CDCl<sub>3</sub>) δ 5.24 (s, 1H), 3.54 (s, 3H), 2.83 (dd, *J* = 8.7, 5.4 Hz, 1H), 1.95-1.67 (m, 4H), 1.36-1.00 (m, 6H). <sup>13</sup>C NMR (100 MHz, CDCl<sub>3</sub>) δ 76.7, 62.6, 59.3, 30.6, 26.1, 24.6. HRMS-ESI (*m/z*): calcd for C<sub>7</sub>H<sub>16</sub>NO, [*M*+*H*]: 130.1232, found 130.1233.

***O*-benzyl-*N*-(4-phenylbutan-2-yl)hydroxylamine (2ai):**

Yield: 60.0 mg (94%), colorless oil. <sup>1</sup>H NMR (400 MHz, CDCl<sub>3</sub>) δ 7.46-7.19 (m, 7H), 7.15 (d, *J* = 6.9 Hz, 3H), 5.34 (s, 1H), 4.69 (s, 2H), 3.05 (dd, *J* = 12.5, 6.2 Hz, 1H), 2.62 (dt, *J* = 14.0, 7.0 Hz, 2H), 1.91-1.76 (m, 1H), 1.67-1.52 (m, 1H), 1.10 (d, *J* = 6.3 Hz, 3H). <sup>13</sup>C NMR (100 MHz, CDCl<sub>3</sub>) δ 142.3, 138.1, 128.5, 127.9, 125.9, 76.8, 55.8, 35.9, 32.4, 18.3. HRMS-ESI (*m/z*): calcd for C<sub>17</sub>H<sub>22</sub>NO, [*M*+*H*]: 256.1701, found 256.1714.

***O*-benzyl-*N*-cyclobutylhydroxylamine (2aj):**

Yield: 38.1 mg (86%), colorless oil. <sup>1</sup>H NMR (400 MHz, CDCl<sub>3</sub>) δ 7.49-7.12 (m, 5H), 5.42 (s, 1H), 4.72 (s, 2H), 3.75-3.60 (m, 1H), 2.21-2.07 (m, 2H), 1.94-1.71 (m, 4H). <sup>13</sup>C NMR (100 MHz, CDCl<sub>3</sub>) δ 138.1, 128.4, 128.3, 127.8, 76.4, 55.8, 27.8, 15.3. HRMS-ESI (*m/z*): calcd for C<sub>11</sub>H<sub>16</sub>NO, [*M*+*H*]: 178.1232, found 178.1237.

***N*-cyclohexylhydroxylamine (2ak)<sup>28</sup>**

Yield: 12.9 mg (45%), white solid, mp: 115-118°C. <sup>1</sup>H NMR (400 MHz, CDCl<sub>3</sub>) δ 5.23 (s, 2H), 2.82 (tt, *J* = 10.5, 3.5 Hz, 1H), 1.91 (d, *J* = 11.5 Hz, 2H), 1.83-1.70 (m, 2H), 1.38-1.02 (m, 6H). <sup>13</sup>C NMR (100 MHz, CDCl<sub>3</sub>) δ 60.5, 30.3, 26.1, 24.6.

***N*-(5-methoxy-1,2,3,4-tetrahydronaphthalen-2-yl)hydroxylamine (2al)**

Yield: 40.6 mg (84%), colorless oil. <sup>1</sup>H NMR (400 MHz, CDCl<sub>3</sub>) δ 7.09 (t, *J* = 7.9 Hz, 1H), 6.68 (dd, *J* = 19.5, 7.9 Hz, 2H), 5.74 (s, 2H), 3.80 (s, 3H), 3.40-3.17 (m, 1H), 3.06-2.82 (m, 2H), 2.73-2.51 (m, 2H), 2.20-2.07 (m, 1H), 1.60 (dtd, *J* = 12.6, 10.3, 6.0 Hz, 1H). <sup>13</sup>C NMR (100 MHz, CDCl<sub>3</sub>) δ 157.2, 135.8, 126.4, 124.9, 121.6, 107.2, 57.0, 55.3, 33.2, 26.1, 21.6. HRMS-ESI (*m/z*): calcd for C<sub>11</sub>H<sub>20</sub>N<sub>2</sub>O, [*M*+*H*]: 194.1181, found 194.1185.

***N*-(4-phenylbutan-2-yl)hydroxylamine (2am)<sup>27</sup>**

Yield: 35.5 mg (86%), white solid, mp: 58-63°C. <sup>1</sup>H NMR (400 MHz, CDCl<sub>3</sub>) δ 7.18 (dd, *J* = 10.8, 4.2 Hz, 2H), 7.15-7.02 (m, 3H), 6.00 (s, 2H), 3.00-2.85 (m, 1H), 2.65-2.46 (m, 2H), 1.89-1.75 (m, 1H), 1.50 (dddd, *J* = 17.4, 13.4, 7.7, 1.5 Hz, 1H), 1.04 (dd, *J* = 6.4, 1.6 Hz, 3H). <sup>13</sup>C NMR (100 MHz, CDCl<sub>3</sub>) δ 142.0, 128.4, 128.3, 125.9, 56.8, 35.4, 32.3, 17.7.

**Furmecyclox (BASF)<sup>30</sup>**

Yield: 213 mg (93%), light yellow oil. <sup>1</sup>H NMR (400 MHz, CDCl<sub>3</sub>) δ 6.18 (s, 1H), 4.23 (dd, *J* = 15.9, 7.6 Hz, 1H), 3.64 (s, 3H), 2.45 (s, 3H), 2.24 (s, 3H), 1.83 (s, 4H), 1.73-1.63 (m, 3H), 1.39-1.28 (m, 2H), 1.15 (ddd, *J* = 11.8, 10.8, 4.5 Hz, 1H). <sup>13</sup>C NMR (100 MHz, CDCl<sub>3</sub>) δ 165.9, 155.8, 149.4, 115.2, 106.2, 64.7, 58.2, 30.2, 25.7, 25.4, 13.7, 13.2.



## References:

1. J. Mas-Rosello, T. Smejkal, N. Cramer, *Science*, 2020, **368**, 1098.
2. J. A. Blake, K. U. Ingold, S. Lin, P. Mulder, D. A. Pratt, B. Sheeller, J. C. Walton, *Org. Biomol. Chem.*, 2004, **2**, 415.
3. X. Huang, M. Ortiz-Marciales, K. Huang, V. Stepanenko, F. G. Merced, A. M. Ayala, W. Correa, M. De Jesus, *Org. Lett.*, 2007, **19**, 1793.
4. W. Ou, S. Espinosa, H. J. Meléndez, S. M. Farré, J. L. Alvarez, V. Torres, I. Martínez, K. M. Santiago, M. Ortiz-Marciales, *J. Org. Chem.*, 2013, **78**, 5314.
5. M. M. Pakulski, S. K. Mahato, M. J. Bosiak, M. P. Krzeminski, M. Zaidlewicz, *Tetrahedron Asymmetry*, 2012, **23**, 716.
6. L. M. Klingensmith, K. A. Nadeau, G. A. Moniz, *Tetrahedron Lett.*, 2007, **48**, 4589.
7. S. Madabhushi, N. Chinthala, V. S. Vangipuram, K. R. Godala, R. Jillella, K. K. R. Mallu, R. C. Beeram, *Tetrahedron Lett.*, 2011, **52**, 6103.
8. K. Guo, X. Chen, M. Guan, Y. Zhao, *Org. Lett.*, 2015, **17**, 1802.
9. C. Zhou, T. Lei, X.-Z. Wei, C. Ye, Z. Liu, B. Chen, C.-H. Tung, L.-Z. Wu, *J. Am. Chem. Soc.*, 2020, **142**, 16805.
10. H. M. Ismail, V. E. Barton, M. Panchana, S. Charoensutthivarakul, G. A. Biagini, S. A. Ward, P. M. O'Neill, *Angew. Chem. Int. Ed.*, 2016, **55**, 6401.
11. B. De Peter Lijser, R. Cassandra, J. Rosenberg, J. Hunter, *J. Org. Chem.*, 2009, **74**, 1679.
12. J.-Y. Zhang, J. Hu, X.-X. Li, W.-K. Tang, Y.-S. Feng, *J. Org. Chem.*, 2021, **86**, 12676.
13. C. J. MacNevin, R. L. Moore, D. C. Liotta, *J. Org. Chem.*, 2008, **73**, 1264.
14. Y. Furuya, K. Ishihara, H. Yamamoto, *J. Am. Chem. Soc.*, 2005, **127**, 11240.
15. M. A. Bigdeli, M. M. A. Nikje, S. Jafari, M. M. Heravi, *J. Chem. Res.*, 2002, **2002**, 20.
16. C. Ramalingan, Y. T. Park, *J. Org. Chem.*, 2007, **72**, 4536.
17. X. Yang, S. Liu, S. Yu, L. Kong, Y. Lan, X. Li, *Org. Lett.*, 2018, **20**, 2698.
18. L. De Luca, G. Giacomelli, A. Porcheddu, *J. Org. Chem.*, 2002, **67**, 6272.
19. B. Yao, H. Ji, Y. Cao, Y. Zhou, J. Zhu, J. Lv, Y. Li, J. Chen, C. Zheng, Y. Jiang, R. Liang, H. Tang, *J. Med. Chem.*, 2007, **50**, 5293.
20. X. Jiang, X. Xu, Y. Lin, Y. Yan, P. Li, R. Bai, Y. Xie, *Tetrahedron*, 2018, **74**, 5879.
21. W. D. Emmons, A. S. Pagano, *J. Am. Chem. Soc.*, 1955, **77**, 4557.
22. M. Ueda, S. Sugita, N. Aoi, A. Sato, Y. Ikeda, Y. Ito, T. Miyoshi, T. Naito, O. Miyata, *Chem. Pharm. Bull.*, 2011, **59**, 1206.
23. M. Ueda, H. Miyabe, M. Namba, T. Nakabayashi, T. Naito, *Tetrahedron Lett.*, 2002, **43**, 4369.

24. M. Gopalakrishnan, T. Anandabaskaran, P. Sureshkumar, J. Thanusu, A. K. Kumaran, V. Kanagarajan, *Mendeleev Commun.*, 2006, **1**, 50.
25. P. Li, C. Wu, J. Zhao, Y. Li, W. Xue, F. Shi, *Can. J. Chem.*, 2013, **91**, 43.
26. J. B. Summers, B. P. Gunn, J. G. Martin, H. Mazdiyasi, A. O. Stewart, P. R. Young, A. M. Goetze, J. B. Bouska, R. D. Dyer, *J. Med. Chem.*, 1988, **31**, 3.
27. M. Kawase, Y. Kikugawa, *Chem. Pharm. Bull.*, 1981, **29**, 1615.
28. C. Parmeggiani, C. Matassini, F. Cardona, A. Goti, *Synthesis*, 2017, **49**, 2890.
29. A. O. Stewart, P. A. Bhatia, J. G. Martin, J. B. Summers, K. E. Rodriques, M. B. Martin, H. H. James, L. M. Jimmie, A. C. Richard, K. Teodozyj, D. R. James, M. Hormoz, A. J. K. Francis, L. Shari, G. M. Robert, B. B. Jennifer, R. Y. Patrick, L. Carmine, L. B. Randy, W. C. George, C. D. Brooks, *J. Med. Chem.*, 1997, **40**, 1955.
30. R. Romero-Gonzalez, A. Frenich Garrido, J. L. Vidal Martinez, *Talanta*, 2008, **76**, 211.

## F. NMR Spectra

<sup>1</sup>H NMR spectra of (*E*)-1-phenylethan-1-one *O*-benzyl oxime (1a)

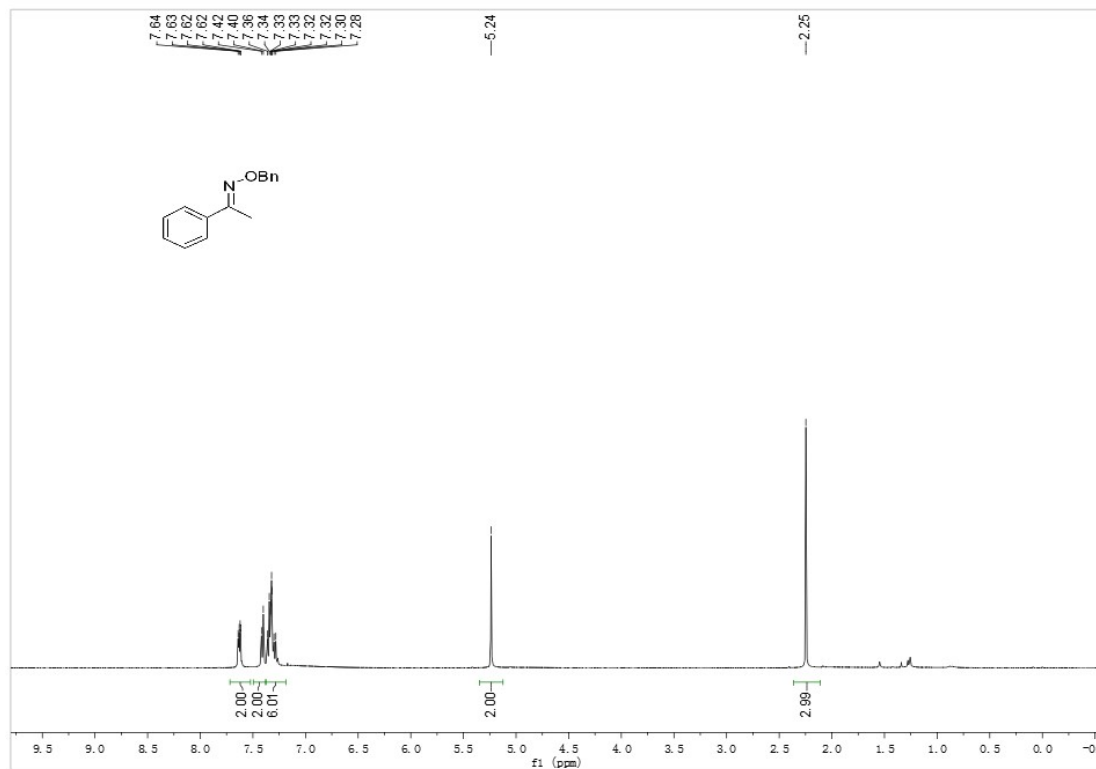

<sup>13</sup>C NMR spectra of (*E*)-1-phenylethan-1-one *O*-benzyl oxime (1a)

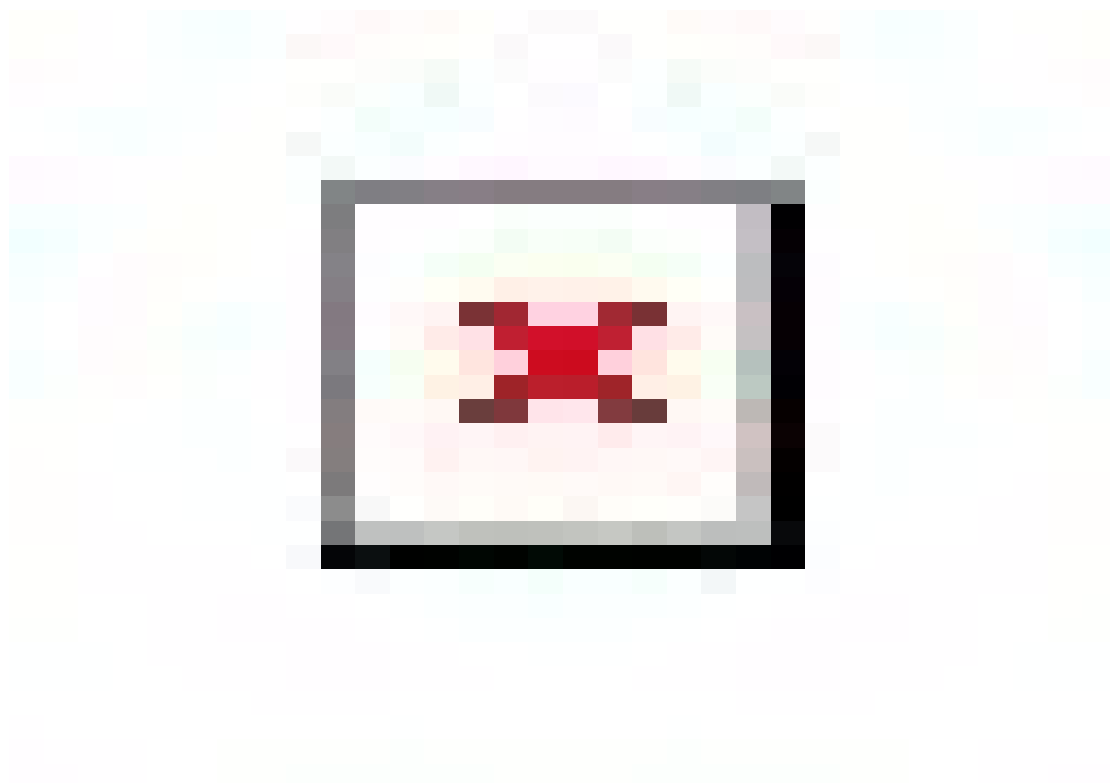

**<sup>1</sup>H NMR spectra of (*E*)-1-(*p*-tolyl)ethan-1-one *O*-benzyl oxime (1b)**

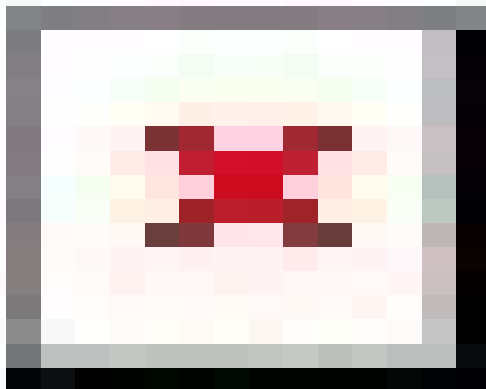

**<sup>13</sup>C NMR spectra of (*E*)-1-(*p*-tolyl)ethan-1-one *O*-benzyl oxime (1b)**

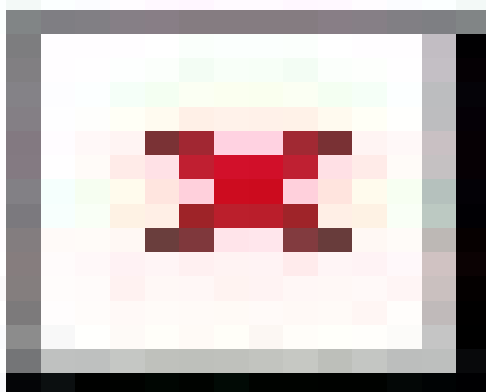

**<sup>1</sup>H NMR spectra of (*E*)-1-(4-(*tert*-butyl)phenyl)ethan-1-one *O*-benzyl oxime (1c)**

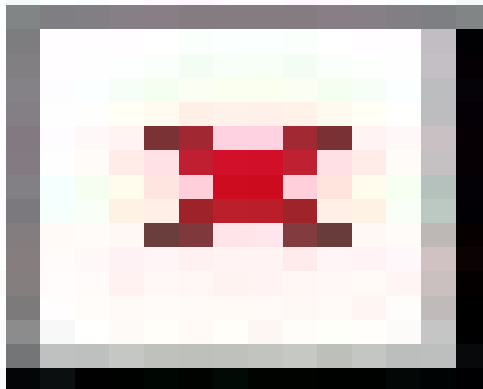

**<sup>13</sup>C NMR spectra of (*E*)-1-(4-(*tert*-butyl)phenyl)ethan-1-one *O*-benzyl oxime (1c)**

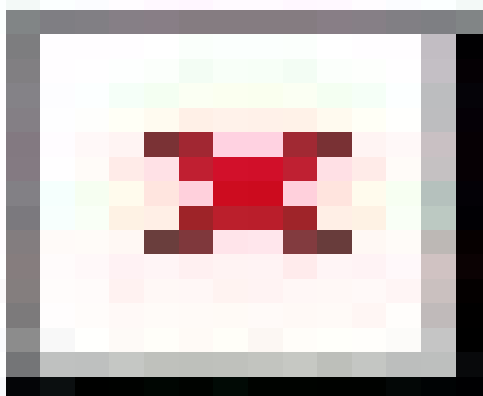

**<sup>1</sup>H NMR spectra of (*E*)-1-(3-methoxyphenyl)ethan-1-one *O*-benzyl oxime (1d)**

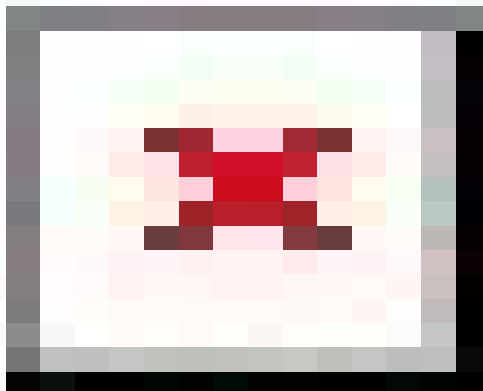

**<sup>13</sup>C NMR spectra of (*E*)-1-(3-methoxyphenyl)ethan-1-one *O*-benzyl oxime (1d)**

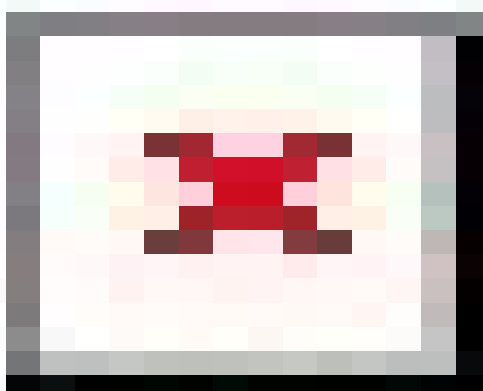

**<sup>1</sup>H NMR spectra of (*E*)-1-(4-isopropylphenyl)ethan-1-one *O*-benzyl oxime (1e)**

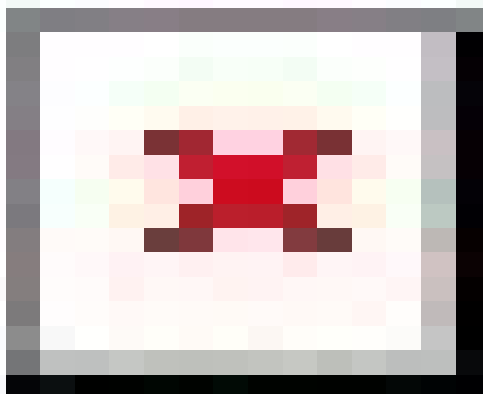

**<sup>13</sup>C NMR spectra of (*E*)-1-(4-isopropylphenyl)ethan-1-one *O*-benzyl oxime (1e)**

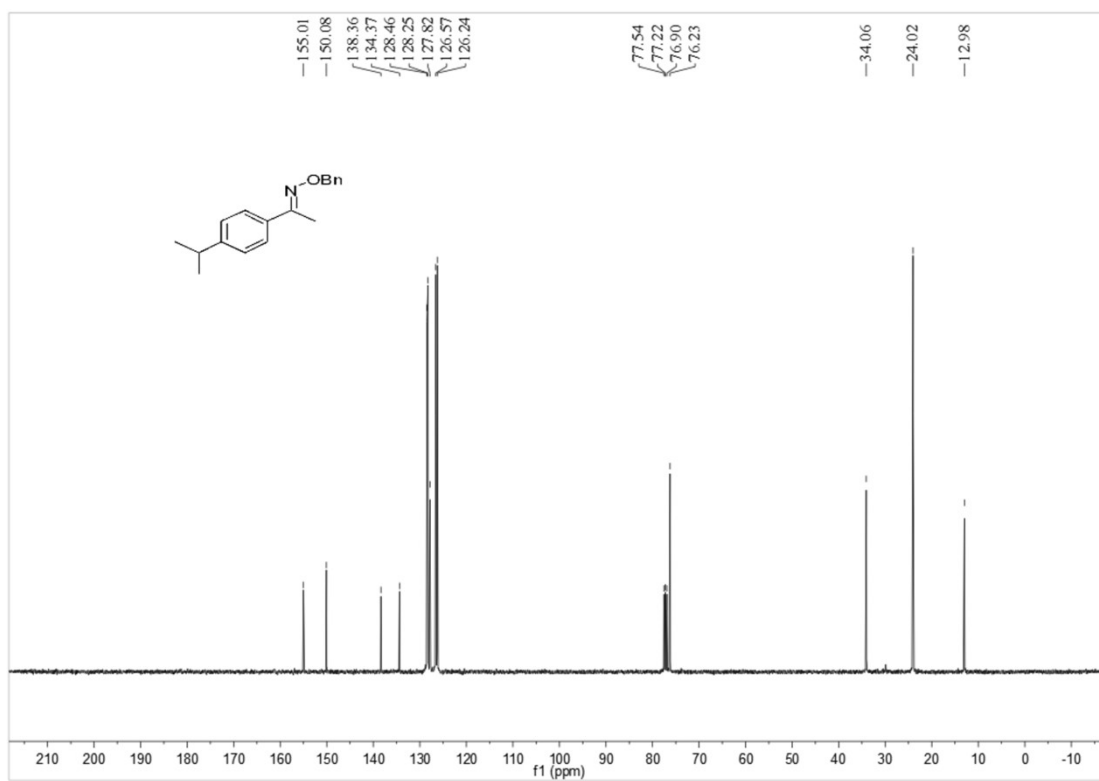

**<sup>1</sup>H NMR spectra of (*E*)-1-(4-chlorophenyl)ethan-1-one *O*-benzyl oxime (1f)**

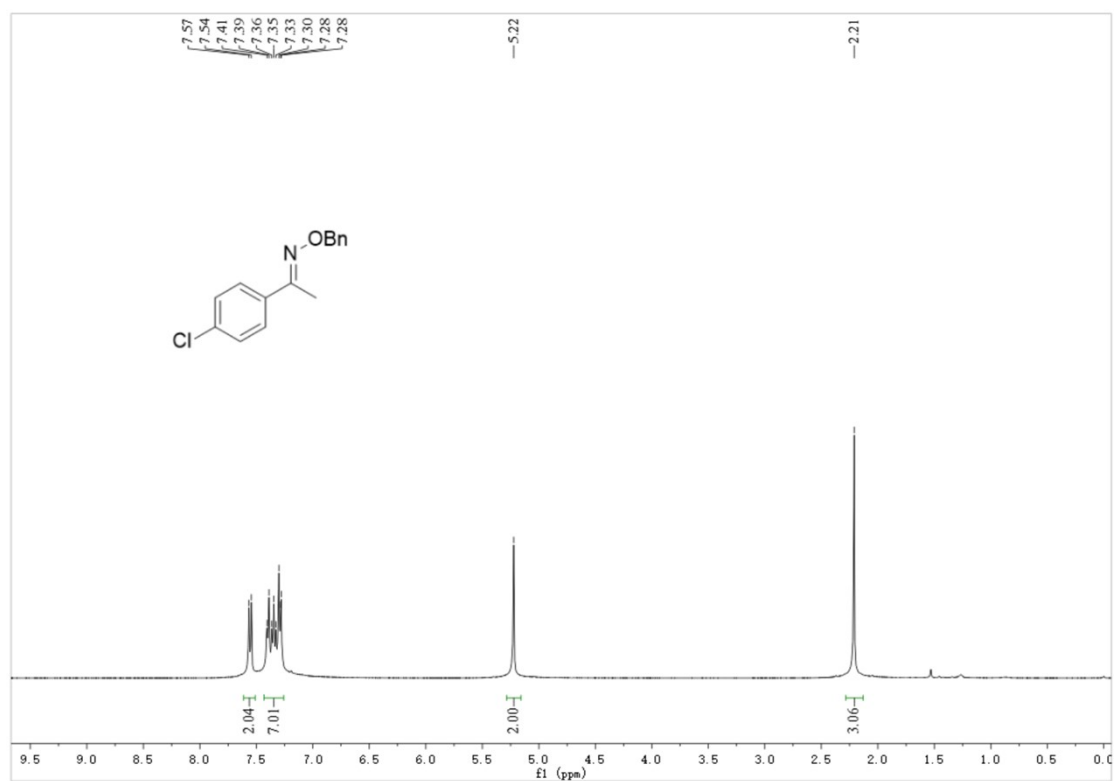

**<sup>13</sup>C NMR spectra of (*E*)-1-(4-chlorophenyl)ethan-1-one *O*-benzyl oxime (1f)**

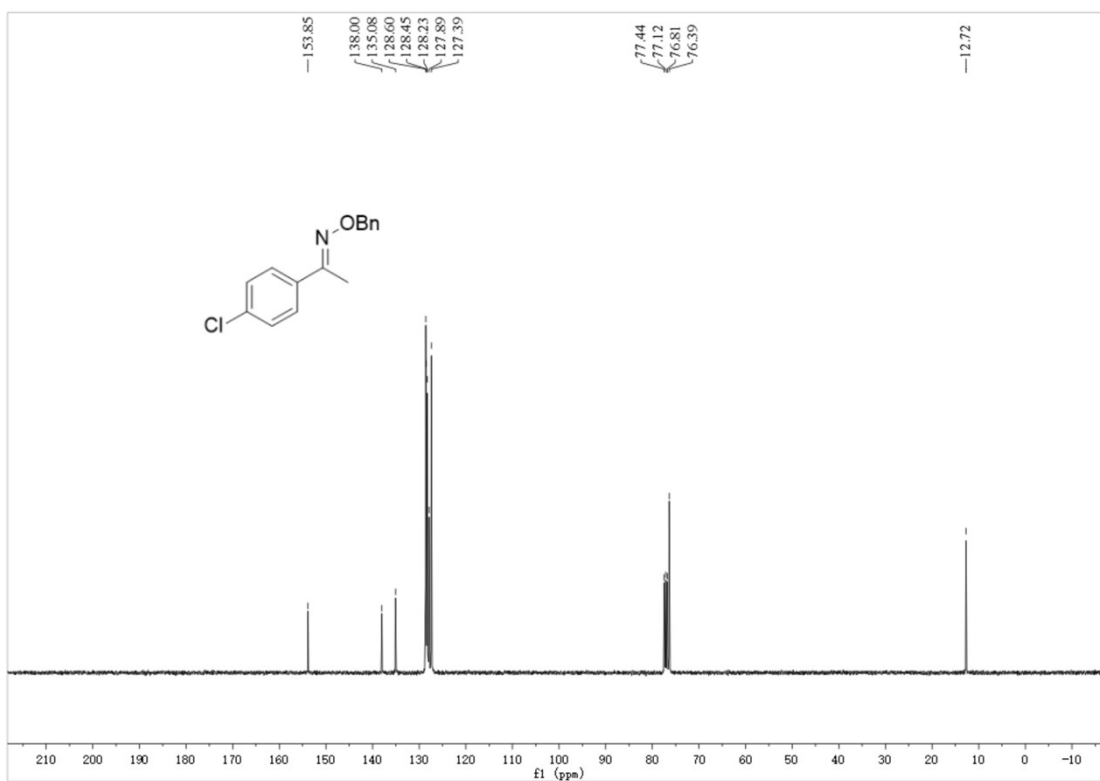



**<sup>1</sup>H NMR spectra of (*E*)-1-(4-bromophenyl)ethan-1-one *O*-benzyl oxime (1g)**

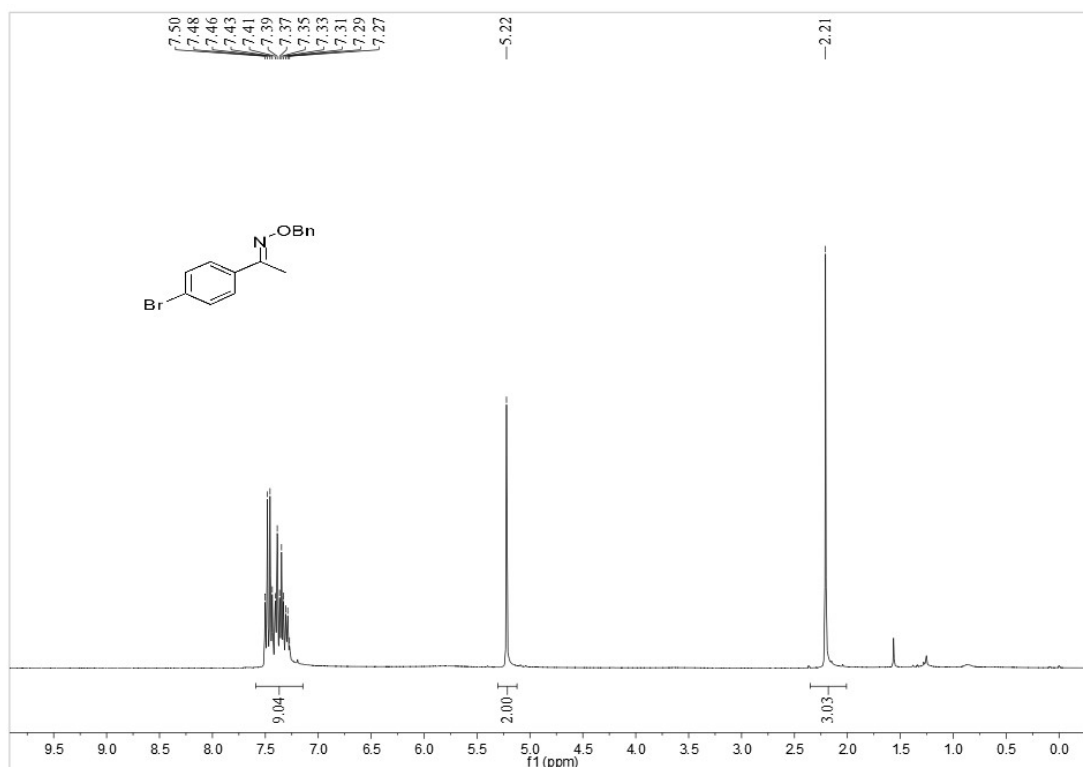

**<sup>13</sup>C NMR spectra of (*E*)-1-(4-bromophenyl)ethan-1-one *O*-benzyl oxime (1g)**

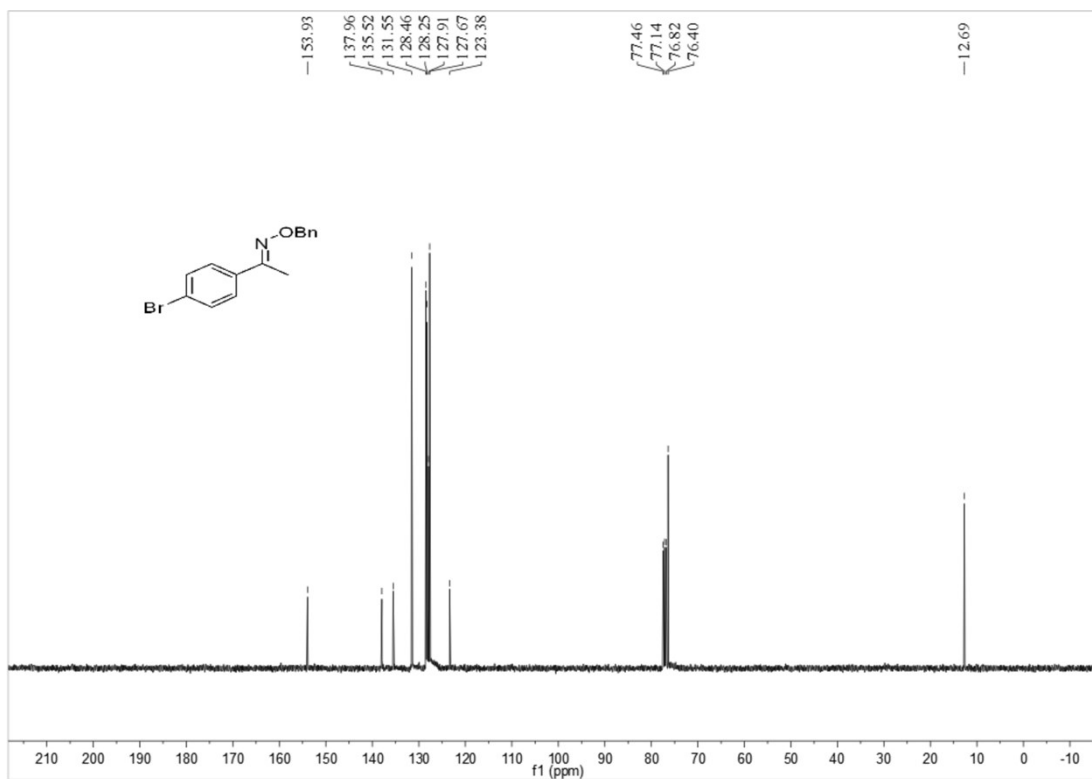

**<sup>1</sup>H NMR spectra of (*E*)-1-(3-(trifluoromethyl)phenyl)ethan-1-one *O*-benzyl oxime (1h)**

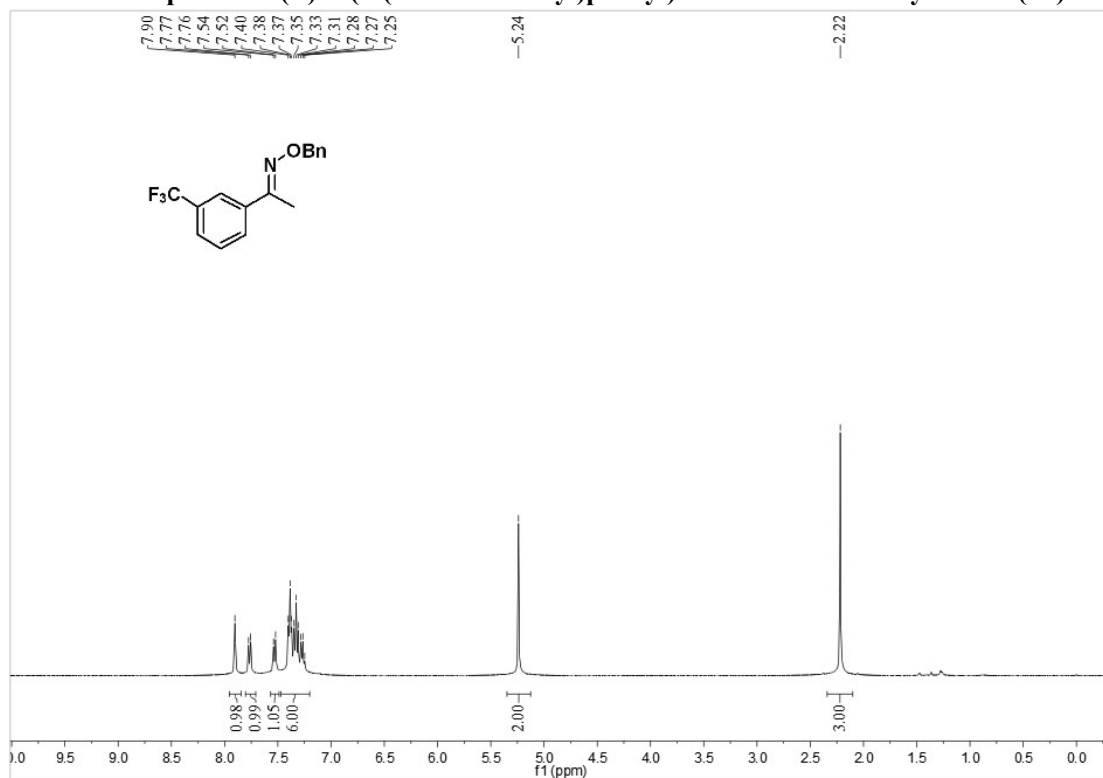

**<sup>13</sup>C NMR spectra of (*E*)-1-(3-(trifluoromethyl)phenyl)ethan-1-one *O*-benzyl oxime (1h)**

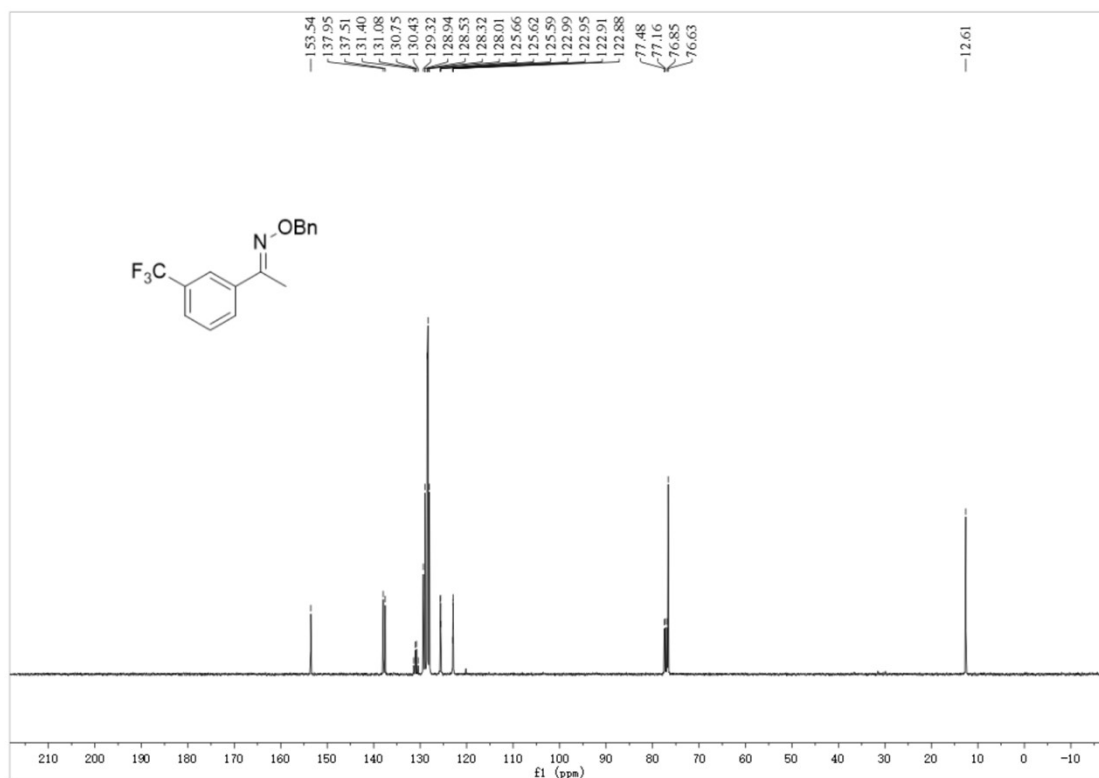

**<sup>1</sup>H NMR spectra of (*E*)-1-(2-fluorophenyl)ethan-1-one *O*-benzyl oxime (1i)**

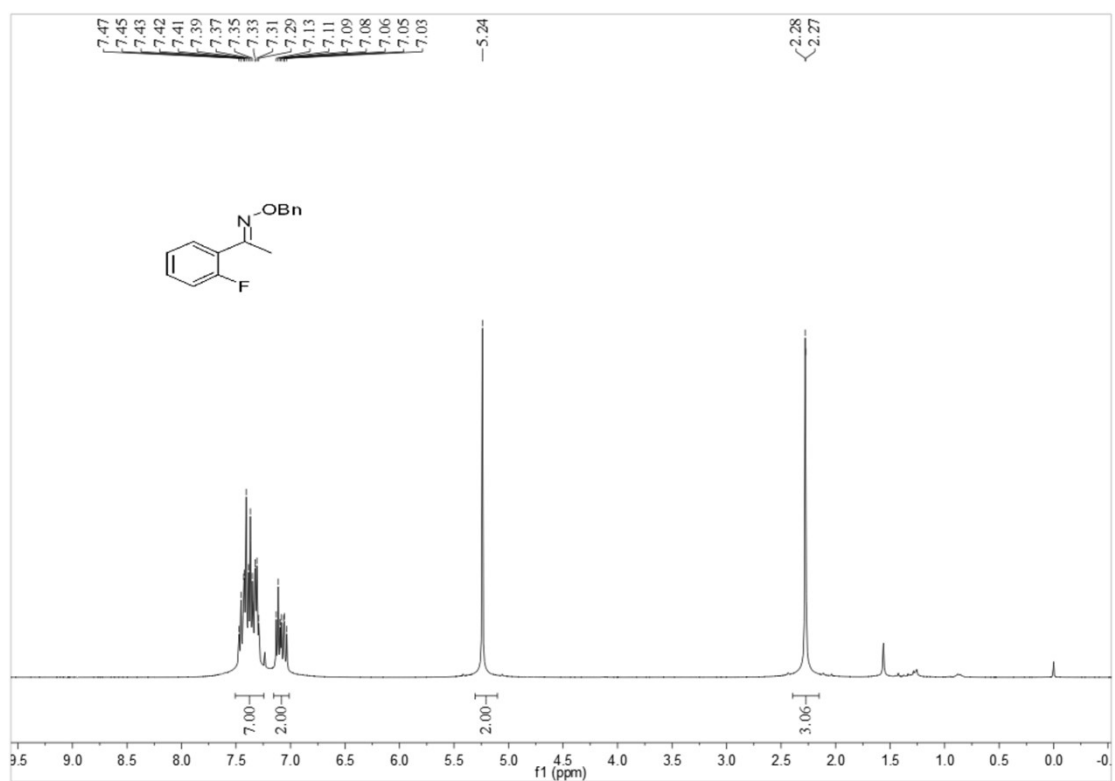

**<sup>13</sup>C NMR spectra of (*E*)-1-(2-fluorophenyl)ethan-1-one *O*-benzyl oxime (1i)**

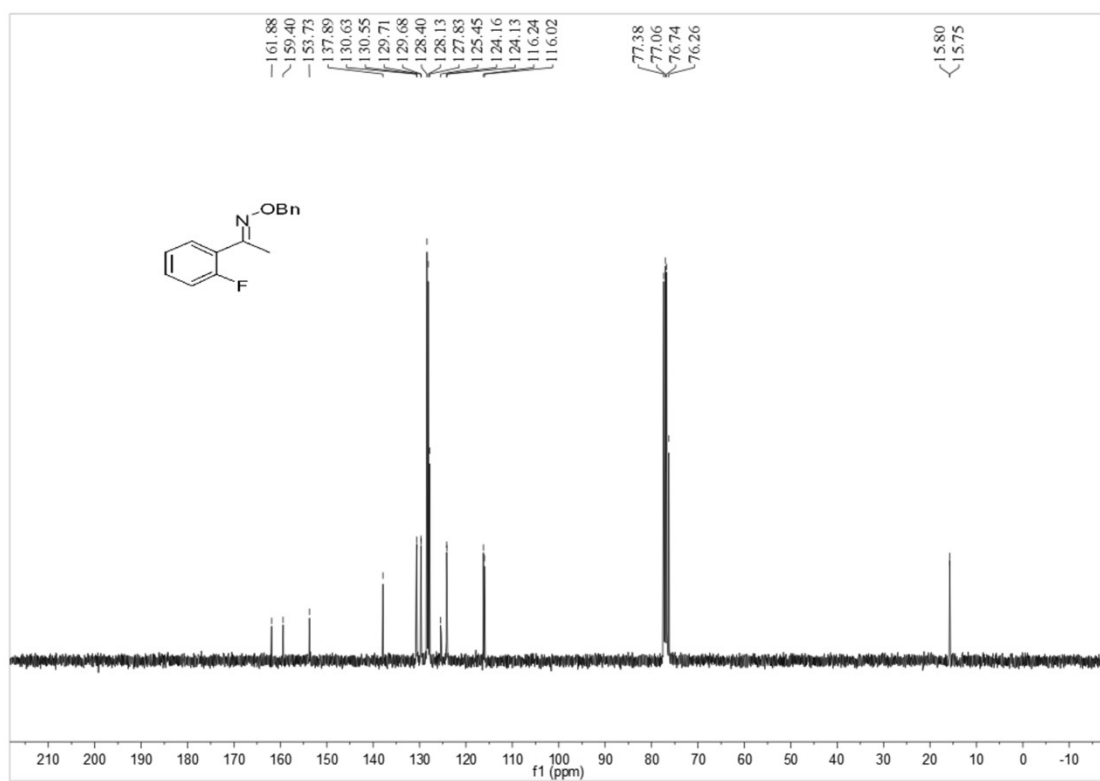

**<sup>1</sup>H NMR spectra of (*E*)-1-(3,5-dimethylphenyl)ethan-1-one *O*-benzyl oxime (1j)**

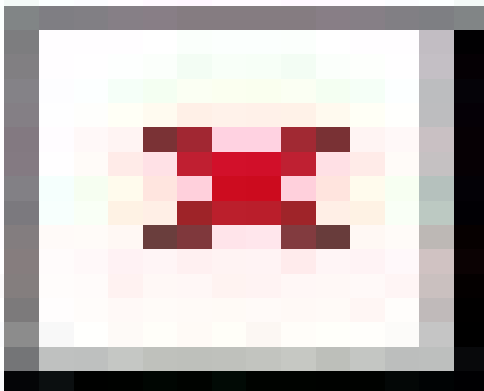

**<sup>13</sup>C NMR spectra of (*E*)-1-(3,5-dimethylphenyl)ethan-1-one *O*-benzyl oxime (1j)**

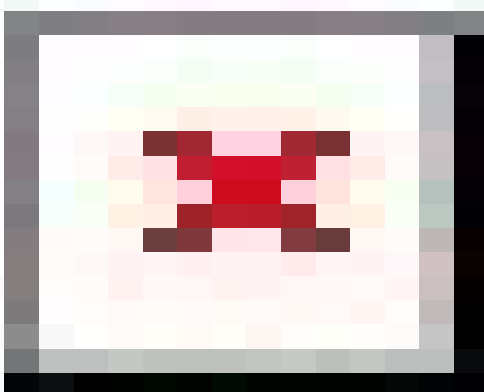

**<sup>1</sup>H NMR spectra of (*E*)-1-(4-fluoro-3-methoxyphenyl)ethan-1-one *O*-benzyl oxime (1k)**

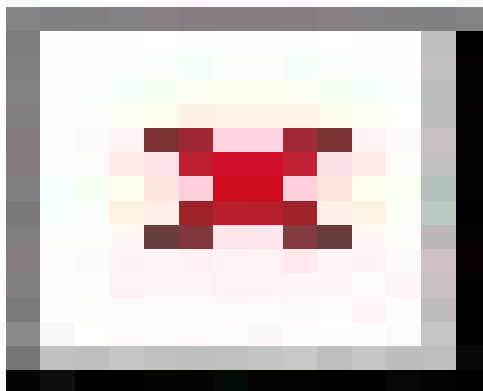

**<sup>13</sup>C NMR spectra of (*E*)-1-(4-fluoro-3-methoxyphenyl)ethan-1-one *O*-benzyl oxime (1k)**

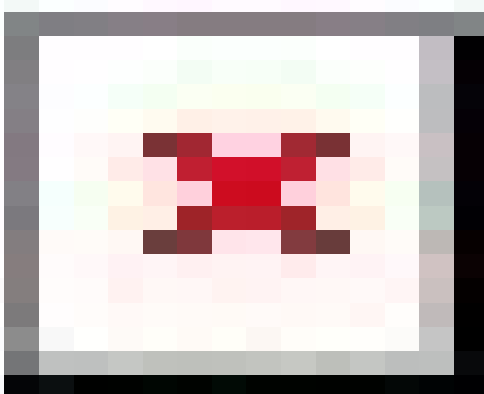

**<sup>1</sup>H NMR spectra of (*E*)-1-(naphthalen-2-yl)ethan-1-one *O*-benzyl oxime (11)**



**<sup>13</sup>C NMR spectra of (*E*)-1-(naphthalen-2-yl)ethan-1-one *O*-benzyl oxime (11)**

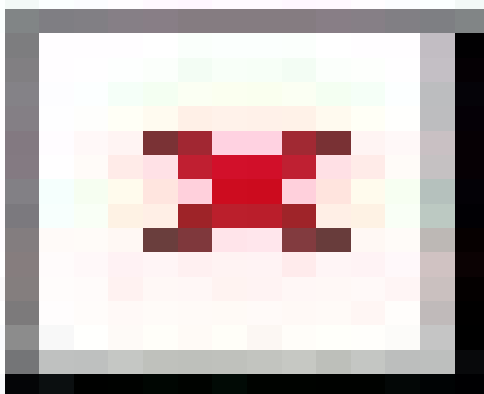

**<sup>1</sup>H NMR spectra of (*E*)-1-(6-methylpyridin-2-yl)ethan-1-one *O*-benzyl oxime (1m)**

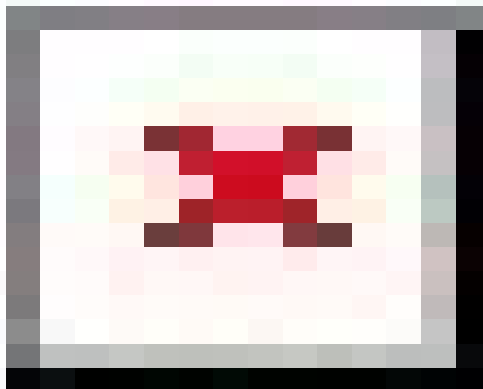

**<sup>13</sup>C NMR spectra of (*E*)-1-(6-methylpyridin-2-yl)ethan-1-one *O*-benzyl oxime (1m)**

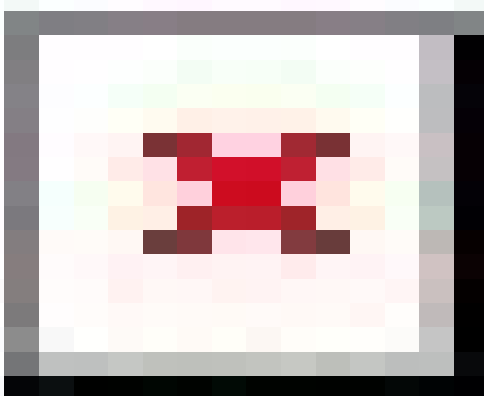

**<sup>1</sup>H NMR spectra of (*E*)-1-(thiophen-2-yl)ethan-1-one *O*-benzyl oxime (1n)**

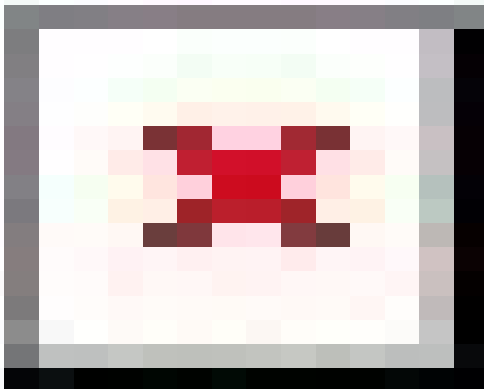

**<sup>13</sup>C NMR spectra of (*E*)-1-(thiophen-2-yl)ethan-1-one *O*-benzyl oxime (1n)**

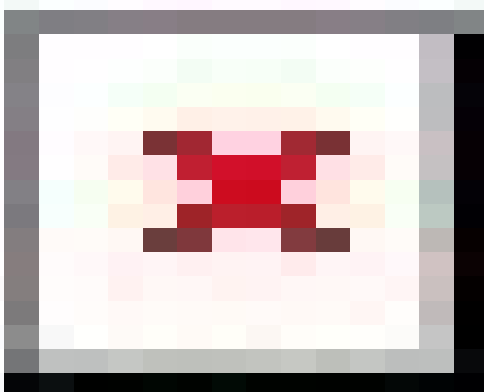



**<sup>1</sup>H NMR spectra of (*E*)-2,3-dihydro-1H-inden-1-one *O*-benzyl oxime (1o)**

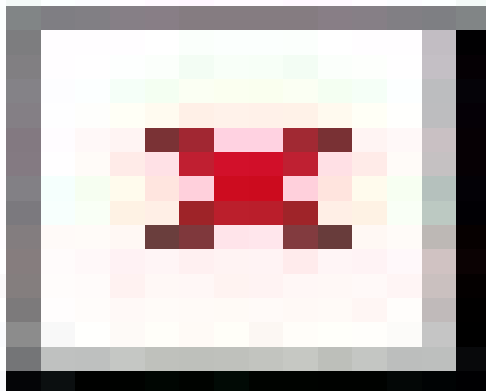

**<sup>13</sup>C NMR spectra of (*E*)-2,3-dihydro-1H-inden-1-one *O*-benzyl oxime (1o)**



**<sup>1</sup>H NMR spectra of (*E*)-7-fluoro-2,3-dihydro-1H-inden-1-one *O*-benzyl oxime (1p)**

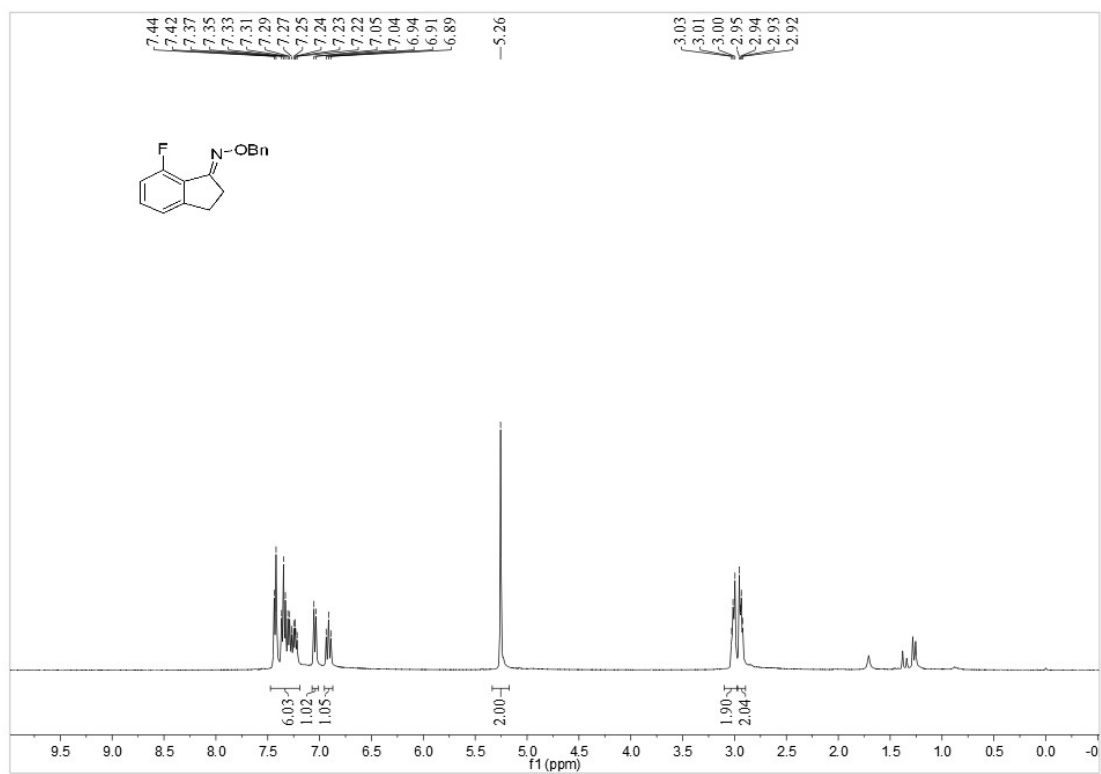

**<sup>13</sup>C NMR spectra of (*E*)-7-fluoro-2,3-dihydro-1H-inden-1-one *O*-benzyl oxime (1p)**

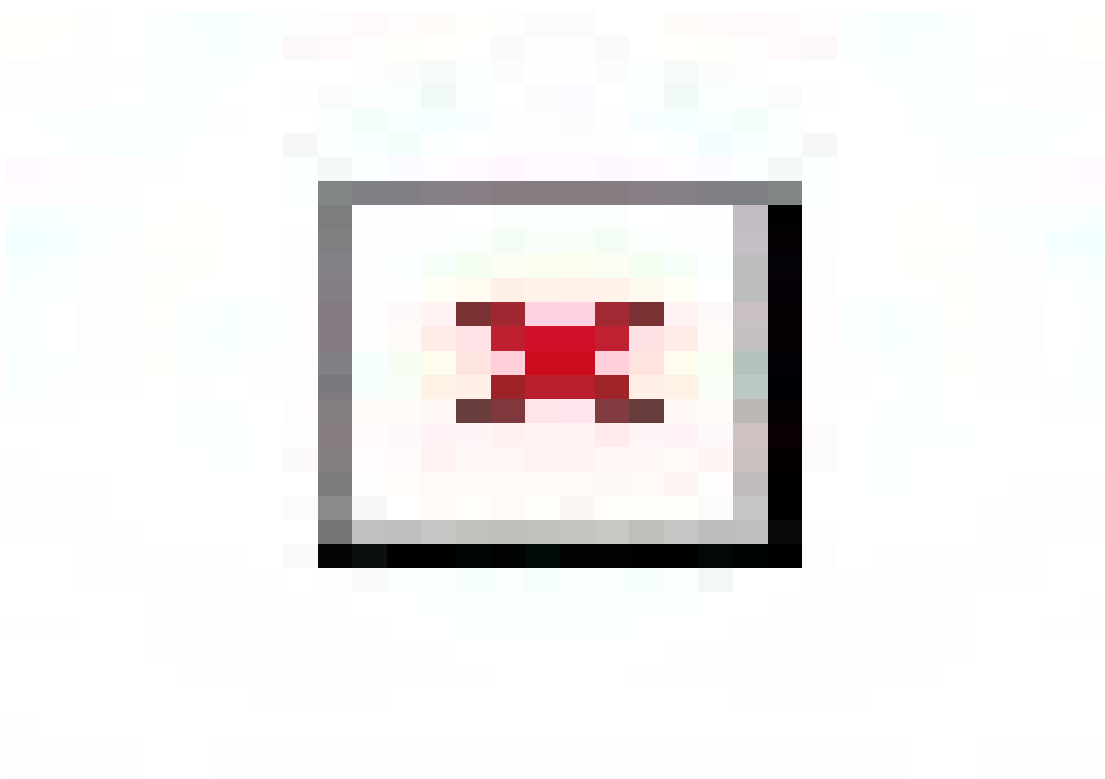

**<sup>1</sup>H NMR spectra of (*E*)-5-fluoro-2,3-dihydro-1H-inden-1-one *O*-benzyl oxime (1q)**



**<sup>13</sup>C NMR spectra of (*E*)-5-fluoro-2,3-dihydro-1H-inden-1-one *O*-benzyl oxime (1q)**

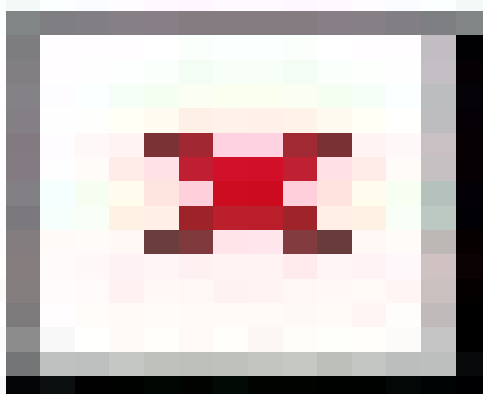

**<sup>1</sup>H NMR spectra of (*E*)-6-methyl-2,3-dihydro-1H-inden-1-one *O*-benzyl oxime (1r)**



**<sup>13</sup>C NMR spectra of (*E*)-6-methyl-2,3-dihydro-1H-inden-1-one *O*-benzyl oxime (1r)**

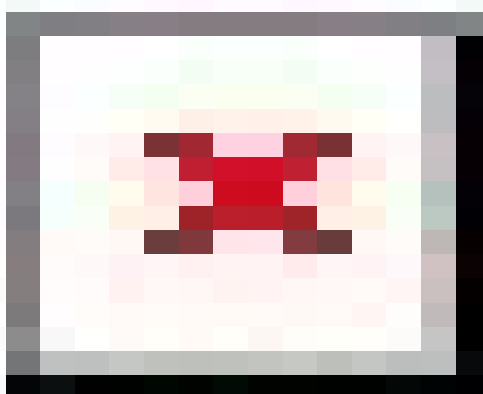

**<sup>1</sup>H NMR spectra of (*E*)-3,4-dihydronaphthalen-1(2H)-one *O*-benzyl oxime (1s)**

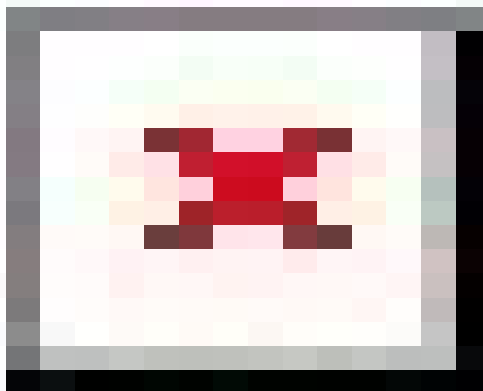

**<sup>13</sup>C NMR spectra of (*E*)-3,4-dihydronaphthalen-1(2H)-one *O*-benzyl oxime (1s)**



**<sup>1</sup>H NMR spectra of (*E*)-3,4-dihydronaphthalen-1(2H)-one *O*-methyl oxime (1t)**



**<sup>13</sup>C NMR spectra of (*E*)-3,4-dihydronaphthalen-1(2H)-one *O*-methyl oxime (1t)**



**<sup>1</sup>H NMR spectra of (E)-7-methoxy-3,4-dihydronaphthalen-1(2H)-one O-benzyl oxime (1v):**

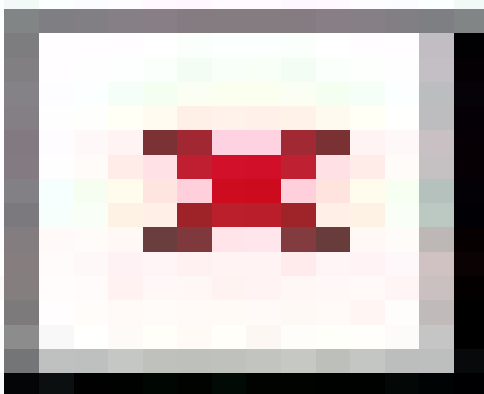

**<sup>13</sup>C NMR spectra of (E)-7-methoxy-3,4-dihydronaphthalen-1(2H)-one O-benzyl oxime (1v):**

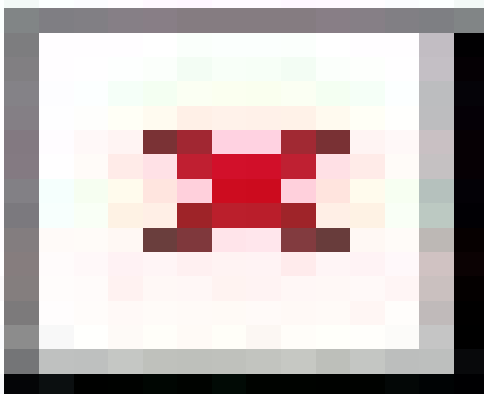

**<sup>1</sup>H NMR spectra of (*E*)-6-chloro-3,4-dihydronaphthalen-1(2H)-one *O*-benzyl oxime (1w)**

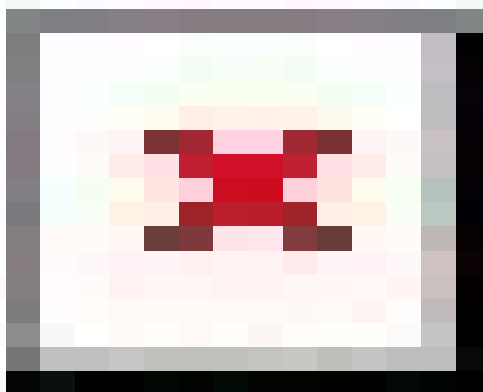

**<sup>13</sup>C NMR spectra of (*E*)-6-chloro-3,4-dihydronaphthalen-1(2H)-one *O*-benzyl oxime (1w)**

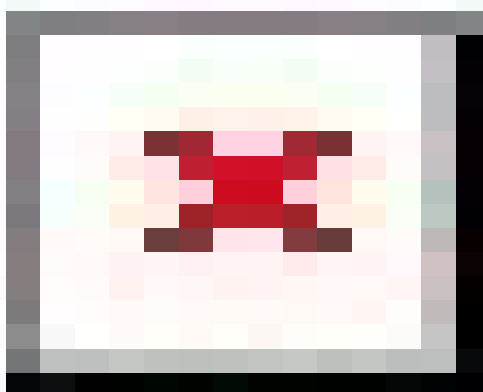



**<sup>1</sup>H NMR spectra of (*E*)-1-phenylbutan-1-one O-benzyl oxime (1x)**

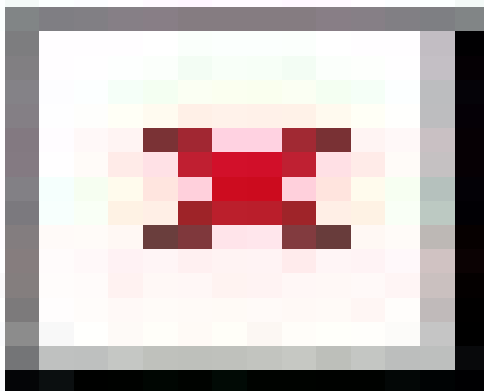

**<sup>13</sup>C NMR spectra of (*E*)-1-phenylbutan-1-one O-benzyl oxime (1x)**



**$^1\text{H}$  NMR spectra of Phenyl(*p*-tolyl)methanone *O*-methyl oxime (1y)**

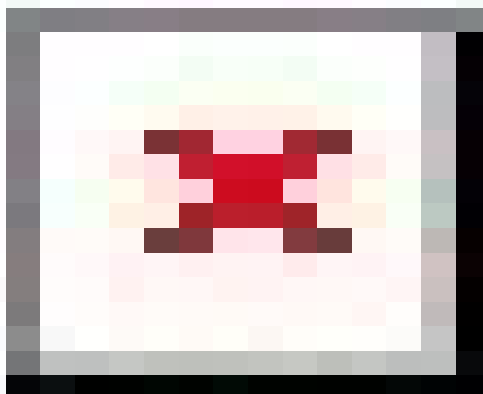

**$^{13}\text{C}$  NMR spectra of Phenyl(*p*-tolyl)methanone *O*-methyl oxime (1y)**

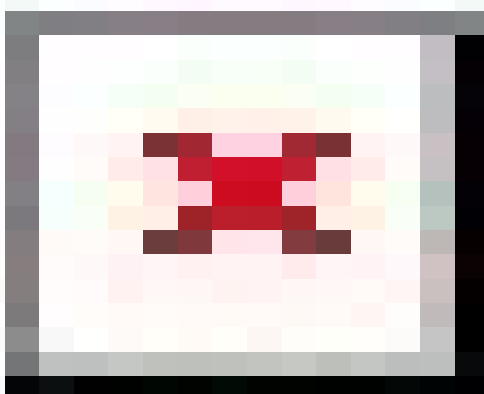

**<sup>1</sup>H NMR spectra of (*E*)-1-phenylethan-1-one oxime (1ba)**



**<sup>13</sup>C NMR spectra of (*E*)-1-phenylethan-1-one oxime (1ba)**



**<sup>1</sup>H NMR spectra of (*E*)-1-(4-fluorophenyl)ethan-1-one oxime (1bb)**

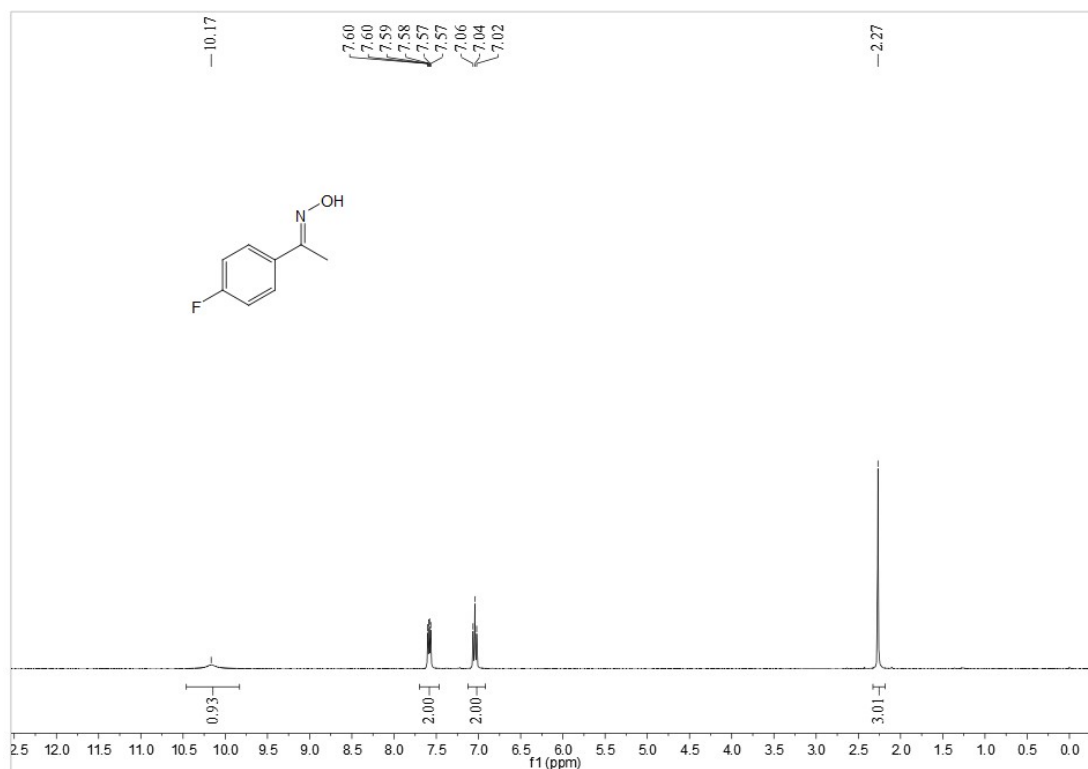

**<sup>13</sup>C NMR spectra of (*E*)-1-(4-fluorophenyl)ethan-1-one oxime (1bb)**

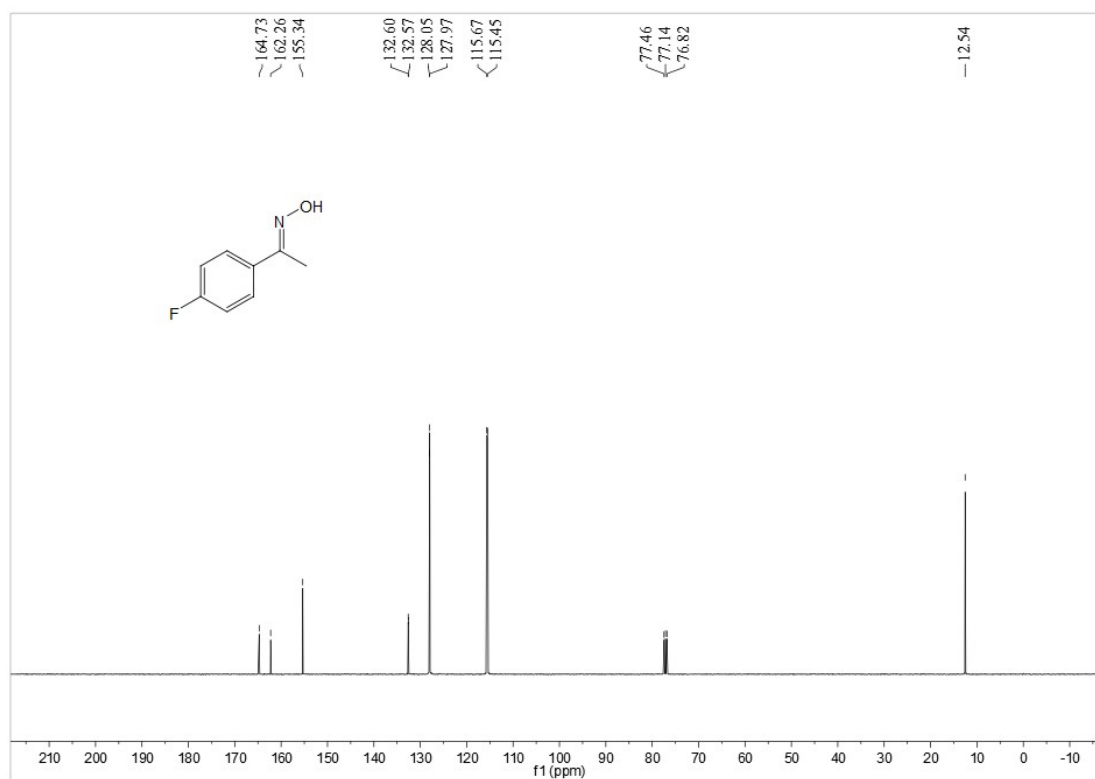

**<sup>1</sup>H NMR spectra of (*E*)-1-(4-chlorophenyl)ethan-1-one oxime (1bc)**

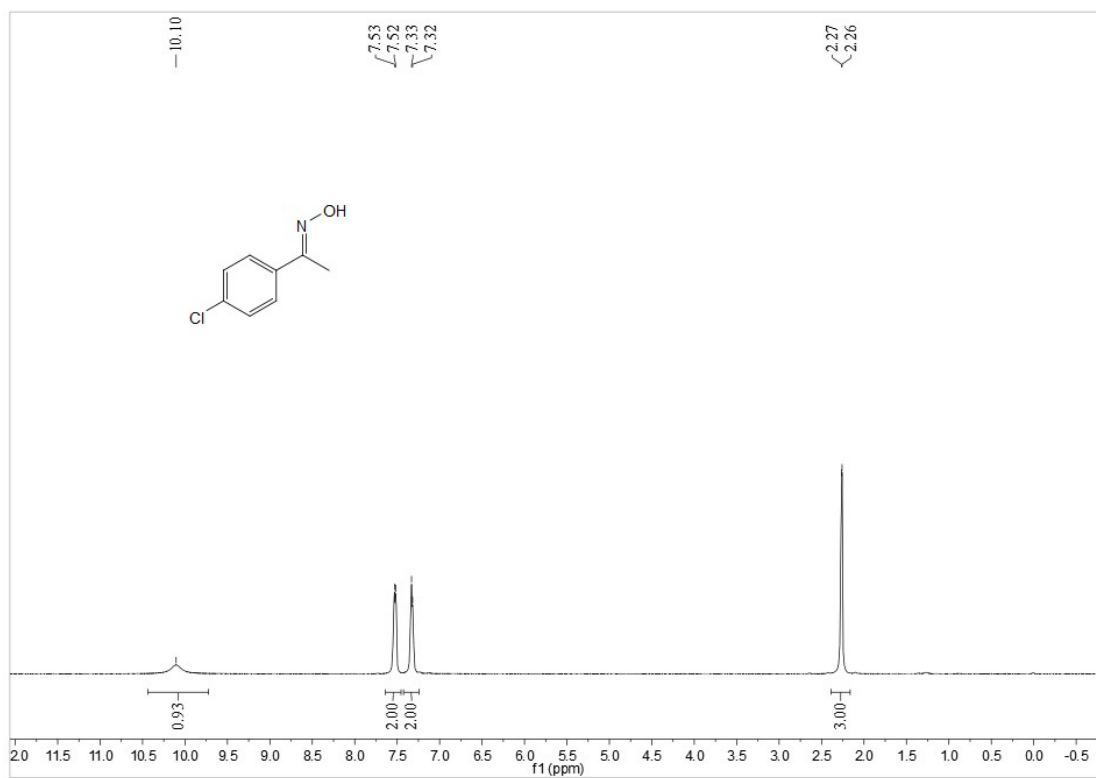

**<sup>13</sup>C NMR spectra of (*E*)-1-(4-chlorophenyl)ethan-1-one oxime (1bc)**

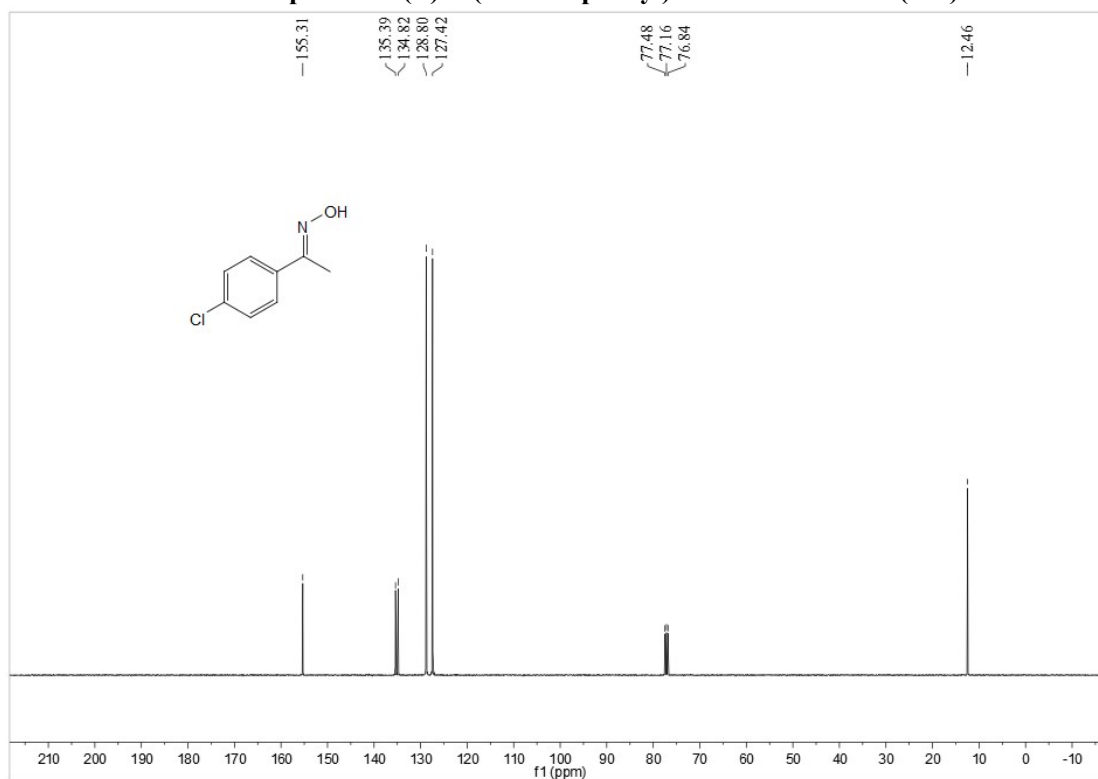

**$^1\text{H}$  NMR spectra of (*E*)-1-(*p*-tolyl)ethan-1-one oxime (1bd)**



**$^{13}\text{C}$  NMR spectra of (*E*)-1-(*p*-tolyl)ethan-1-one oxime (1bd)**

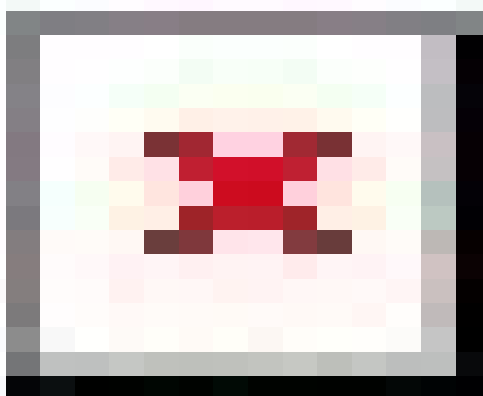

**$^1\text{H}$  NMR spectra of (*E*)-1-(4-(tert-butyl)phenyl)ethan-1-one oxime (1be)**

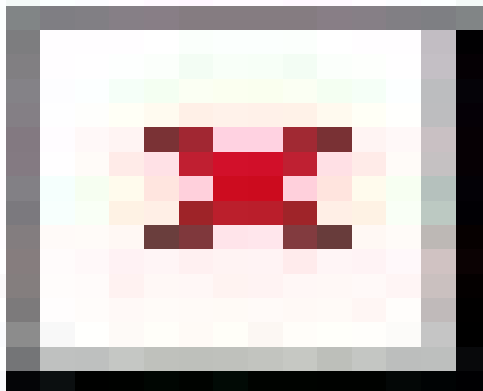

**$^{13}\text{C}$  NMR spectra of (*E*)-1-(4-(tert-butyl)phenyl)ethan-1-one oxime (1be)**



**$^1\text{H}$  NMR spectra of (*E*)-1-(naphthalen-2-yl)ethan-1-one oxime (1bf)**

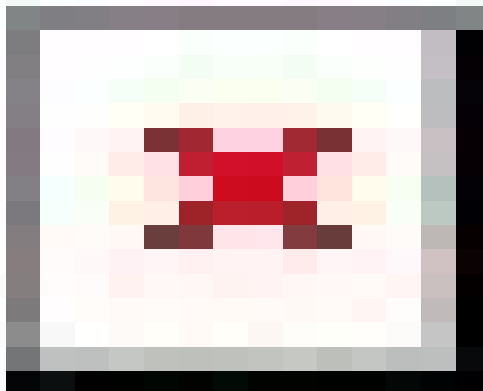

**$^{13}\text{C}$  NMR spectra of (*E*)-1-(naphthalen-2-yl)ethan-1-one oxime (1bf)**

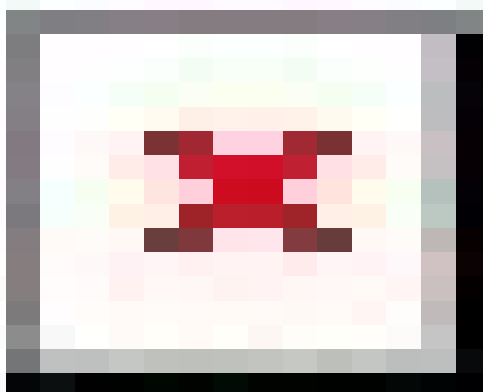



**<sup>1</sup>H NMR spectra of (E)-1-(furan-2-yl)ethan-1-one oxime (1bg)**



**<sup>13</sup>C NMR spectra of (E)-1-(furan-2-yl)ethan-1-one oxime (1bg)**



**<sup>1</sup>H NMR spectra of (*E*)-benzaldehyde *O*-benzyl oxime (1bh)**



**<sup>13</sup>C NMR spectra of (*E*)-benzaldehyde *O*-benzyl oxime (1bh)**

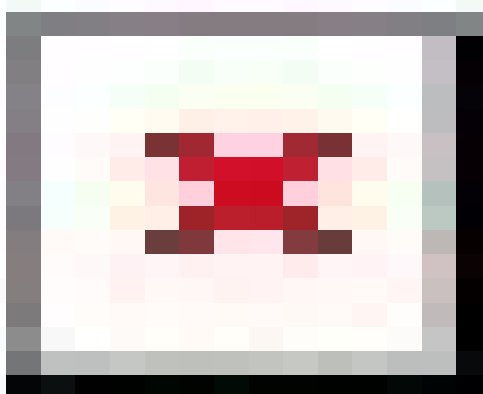

**<sup>1</sup>H NMR spectra of (*E*)-4-fluorobenzaldehyde *O*-benzyl oxime (1bi)**

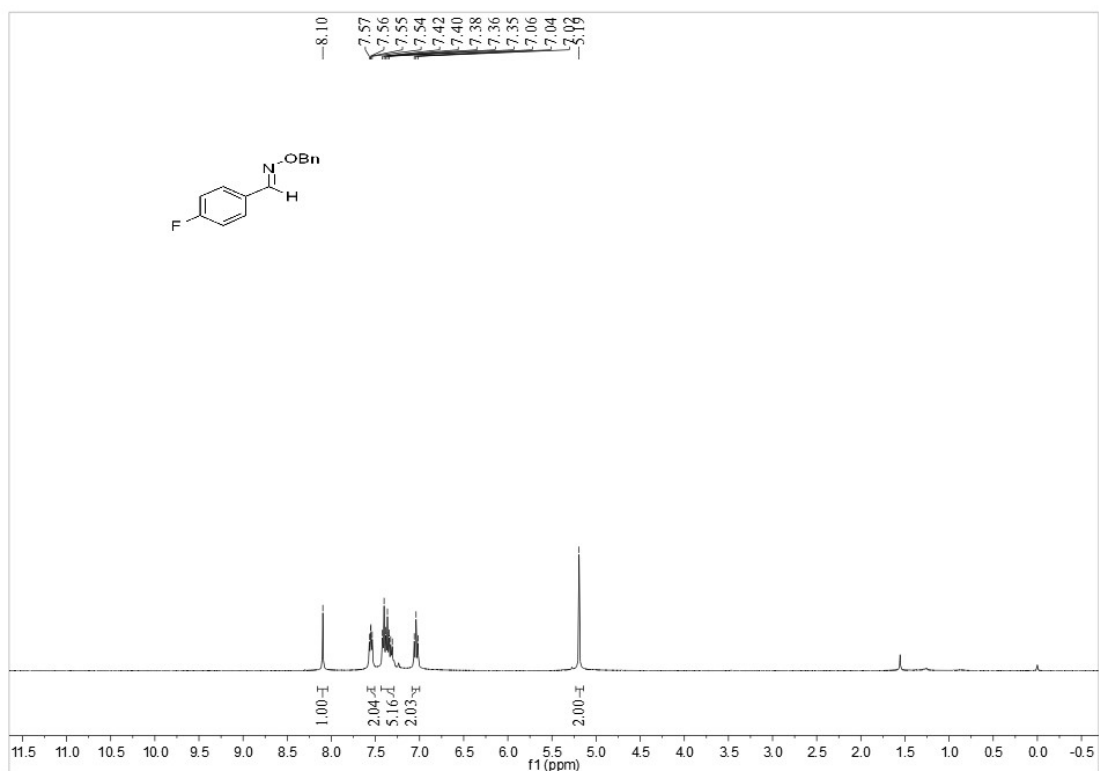

**<sup>13</sup>C NMR spectra of (*E*)-4-fluorobenzaldehyde *O*-benzyl oxime (1bi)**

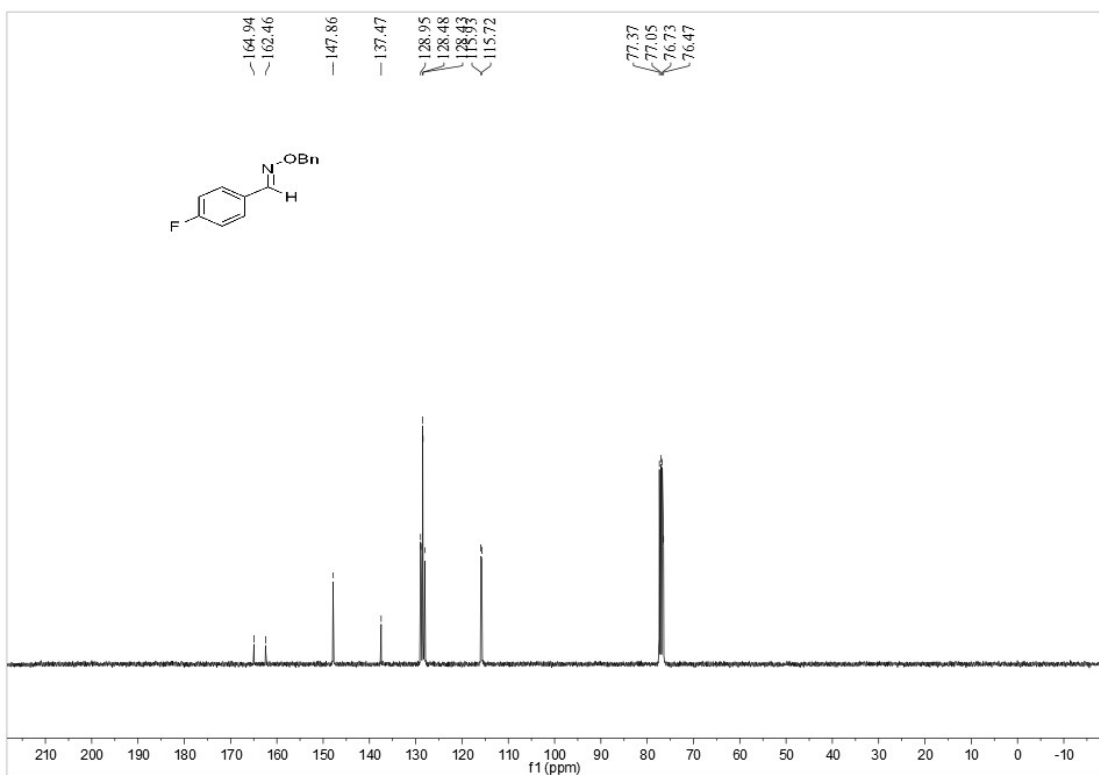

**$^1\text{H}$  NMR spectra of (*E*)-4-methylbenzaldehyde *O*-benzyl oxime (1bj)**

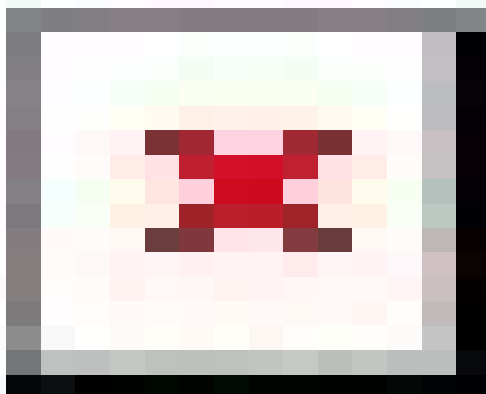

**$^{13}\text{C}$  NMR spectra of (*E*)-4-methylbenzaldehyde *O*-benzyl oxime (1bj)**

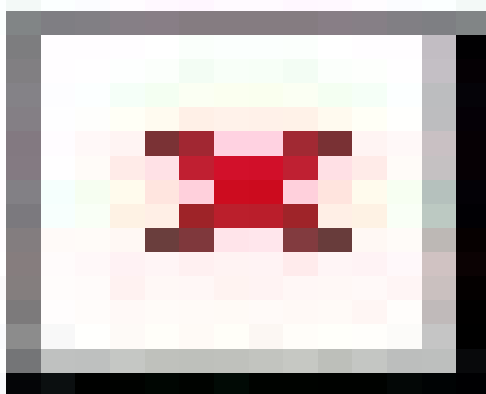

**<sup>1</sup>H NMR spectra of (*E*)-2-naphthaldehyde *O*-benzyl oxime (1bk)**

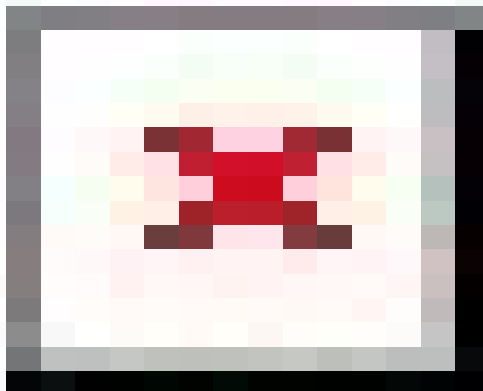

**<sup>13</sup>C NMR spectra of (*E*)-2-naphthaldehyde *O*-benzyl oxime (1bk)**



**<sup>1</sup>H NMR spectra of (*E*)-furan-2-carbaldehyde *O*-benzyl oxime (1b)**



**<sup>13</sup>C NMR spectra of (*E*)-furan-2-carbaldehyde *O*-benzyl oxime (1b)**

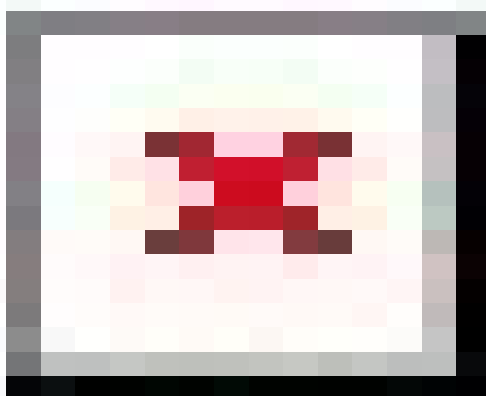

**<sup>1</sup>H NMR spectra of propan-2-one O-benzyl oxime (1aa)**



**<sup>13</sup>C NMR spectra of propan-2-one O-benzyl oxime (1aa)**

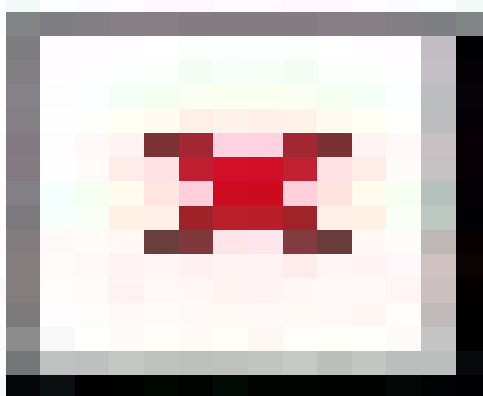

**<sup>1</sup>H NMR spectra of (*E*)-3,3-dimethylbutan-2-one *O*-benzyl oxime (1ab)**

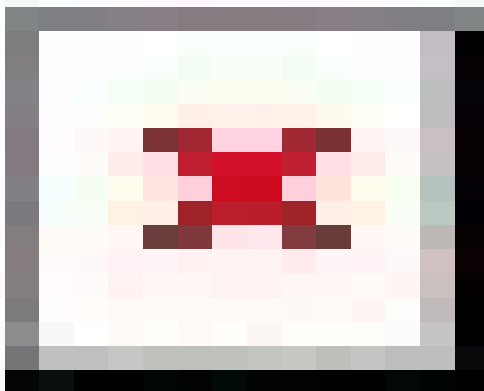

**<sup>13</sup>C NMR spectra of (*E*)-3,3-dimethylbutan-2-one *O*-benzyl oxime (1ab)**





**$^1\text{H}$  NMR spectra of pentan-3-one O-benzyl oxime (1ac)**

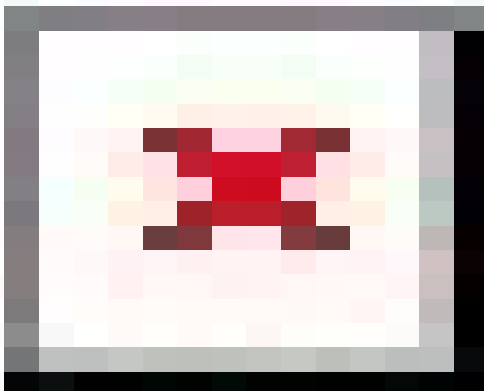

**$^{13}\text{C}$  NMR spectra of pentan-3-one O-benzyl oxime (1ac)**

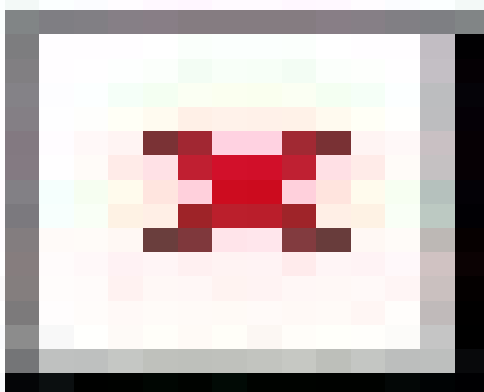

**$^1\text{H}$  NMR spectra of pentan-2-one O-benzyl oxime (1ad)**

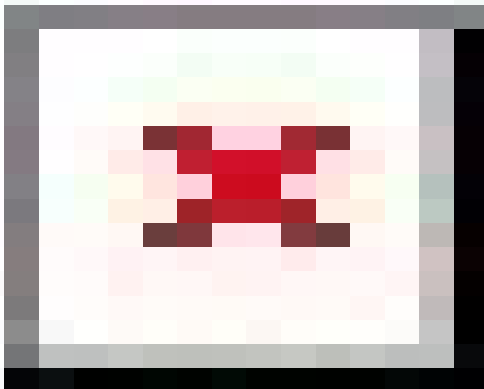

**$^{13}\text{C}$  NMR spectra of pentan-2-one O-benzyl oxime (1ad)**



**<sup>1</sup>H NMR spectra of cyclohexanone *O*-benzyl oxime (1af)**



**<sup>13</sup>C NMR spectra of cyclohexanone *O*-benzyl oxime (1af)**



**<sup>1</sup>H NMR spectra of 5-methoxy-3,4-dihydronaphthalen-2(1H)-one *O*-benzyl oxime (1ag)**



**<sup>13</sup>C NMR spectra of 5-methoxy-3,4-dihydronaphthalen-2(1H)-one *O*-benzyl oxime (1ag)**

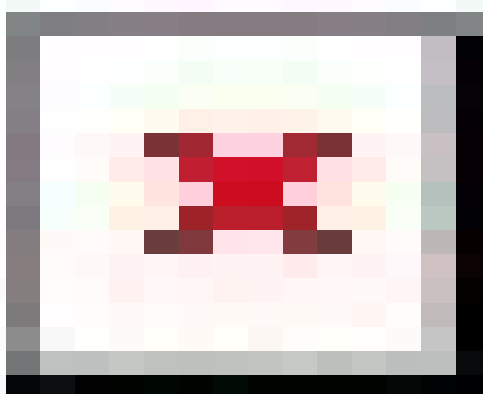

**$^1\text{H}$  NMR spectra of cyclohexanone *O*-methyl oxime (1ah)**



**$^{13}\text{C}$  NMR spectra of cyclohexanone *O*-methyl oxime (1ah)**



**<sup>1</sup>H NMR spectra of (*E*)-4-phenylbutan-2-one *O*-benzyl oxime (1ai)**

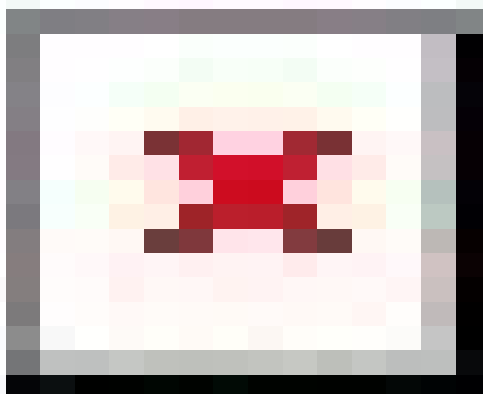

**<sup>13</sup>C NMR spectra of (*E*)-4-phenylbutan-2-one *O*-benzyl oxime (1ai)**

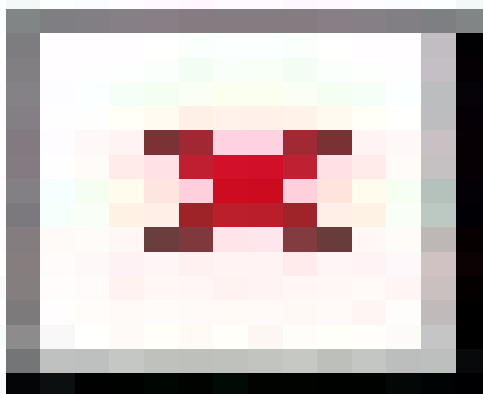

**<sup>1</sup>H NMR spectra of cyclobutanone *O*-benzyl oxime (1aj)**



**<sup>13</sup>C NMR spectra of cyclobutanone *O*-benzyl oxime (1aj)**



**$^1\text{H}$  NMR spectra of cyclohexanone oxime (1ak)**



**$^{13}\text{C}$  NMR spectra of cyclohexanone oxime (1ak)**





**<sup>1</sup>H NMR spectra of (*E*)-5-methoxy-3,4-dihydronaphthalen-2(1H)-one oxime (1a)**

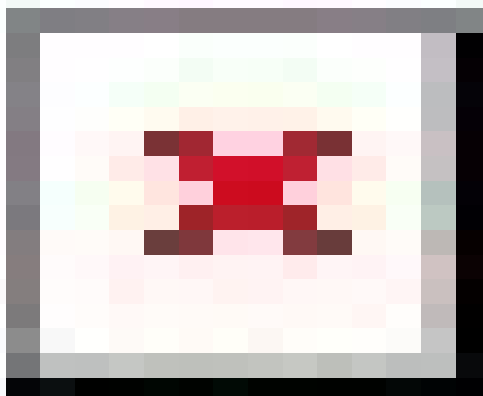

**<sup>13</sup>C NMR spectra of (*E*)-5-methoxy-3,4-dihydronaphthalen-2(1H)-one oxime (1a)**

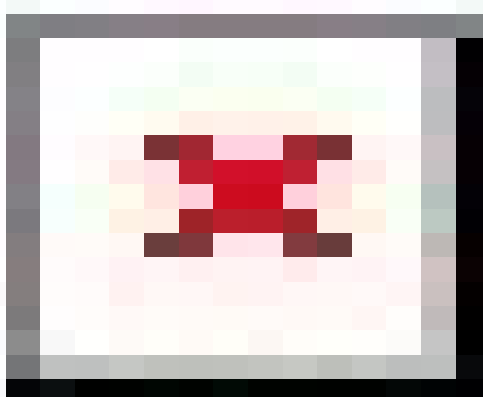

**$^1\text{H}$  NMR spectra of (*E*)-4-phenylbutan-2-one oxime (1am)**



**$^{13}\text{C}$  NMR spectra of (*E*)-4-phenylbutan-2-one oxime (1am)**



**<sup>1</sup>H NMR spectra of *O*-benzyl-*N*-(1-phenylethyl)hydroxylamine (2a)**

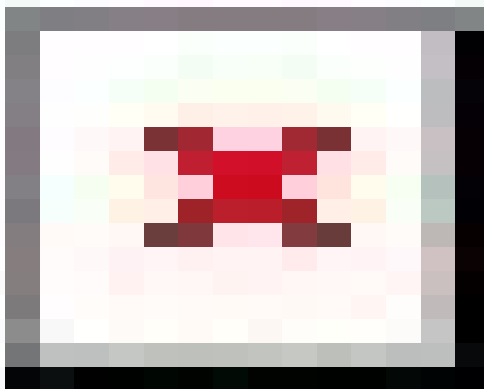

**<sup>13</sup>C NMR spectra of *O*-benzyl-*N*-(1-phenylethyl)hydroxylamine (2a)**

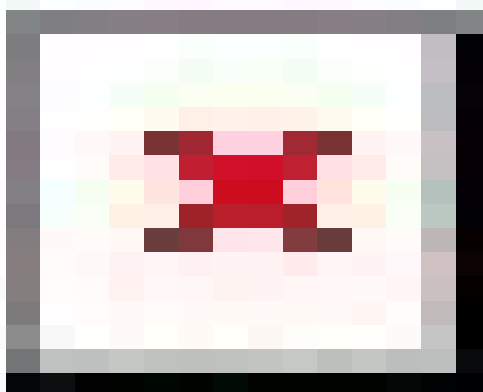

**<sup>1</sup>H NMR spectra of *O*-benzyl-*N*-(1-(*p*-tolyl)ethyl)hydroxylamine (2b)**

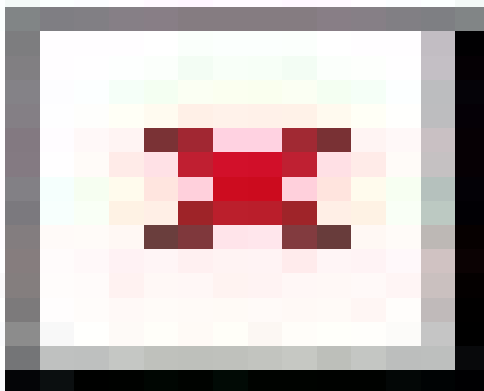

**<sup>13</sup>C NMR spectra of *O*-benzyl-*N*-(1-(*p*-tolyl)ethyl)hydroxylamine (2b)**

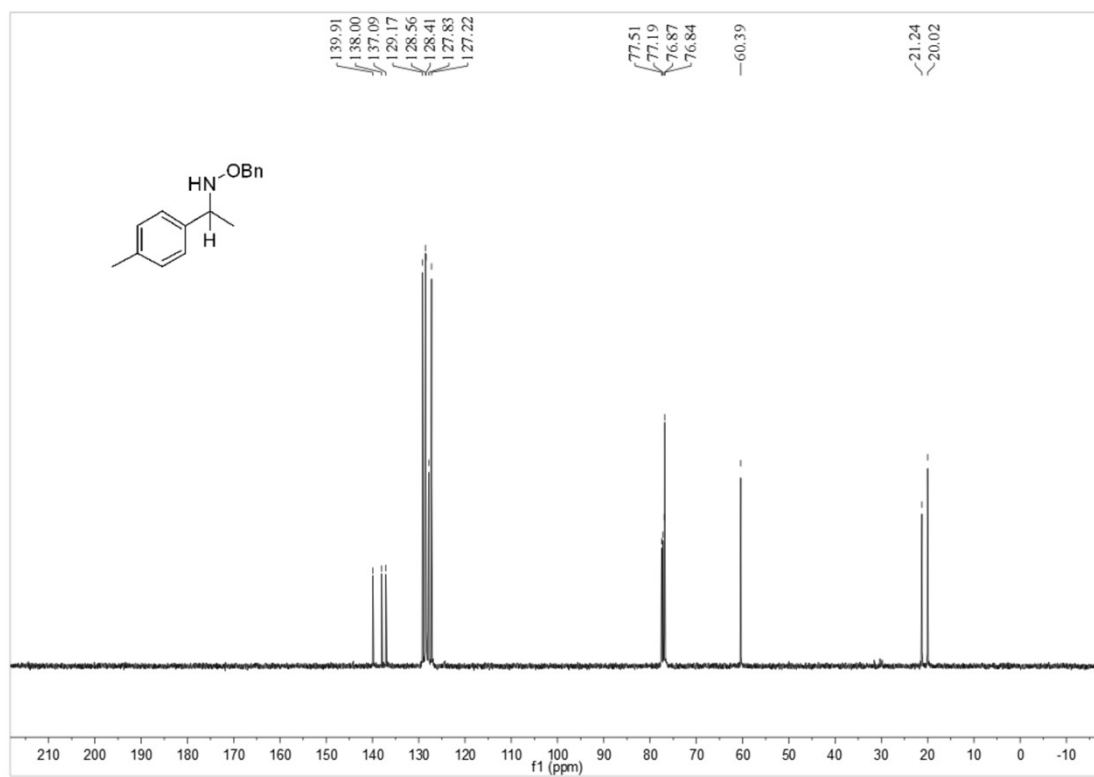

**<sup>1</sup>H NMR spectra of *O*-benzyl-*N*-(1-(4-(tert-butyl)phenyl)ethyl)hydroxylamine (2c)**

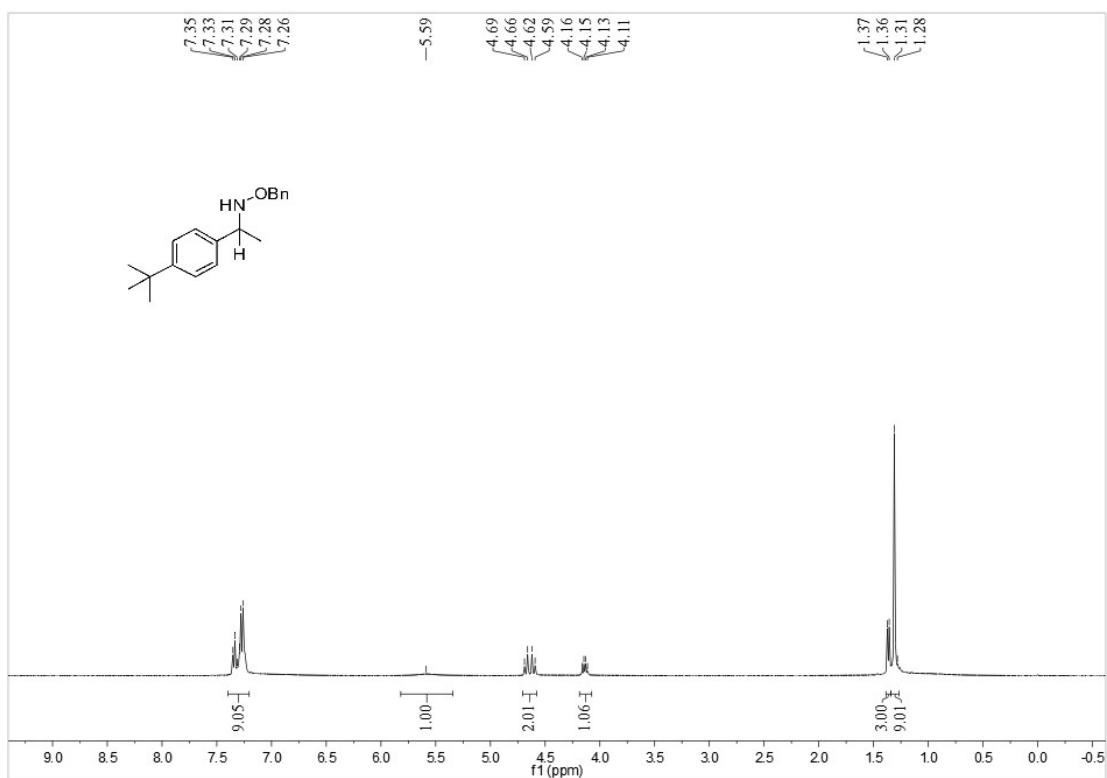

**<sup>13</sup>C NMR spectra of *O*-benzyl-*N*-(1-(4-(tert-butyl)phenyl)ethyl)hydroxylamine (2c)**

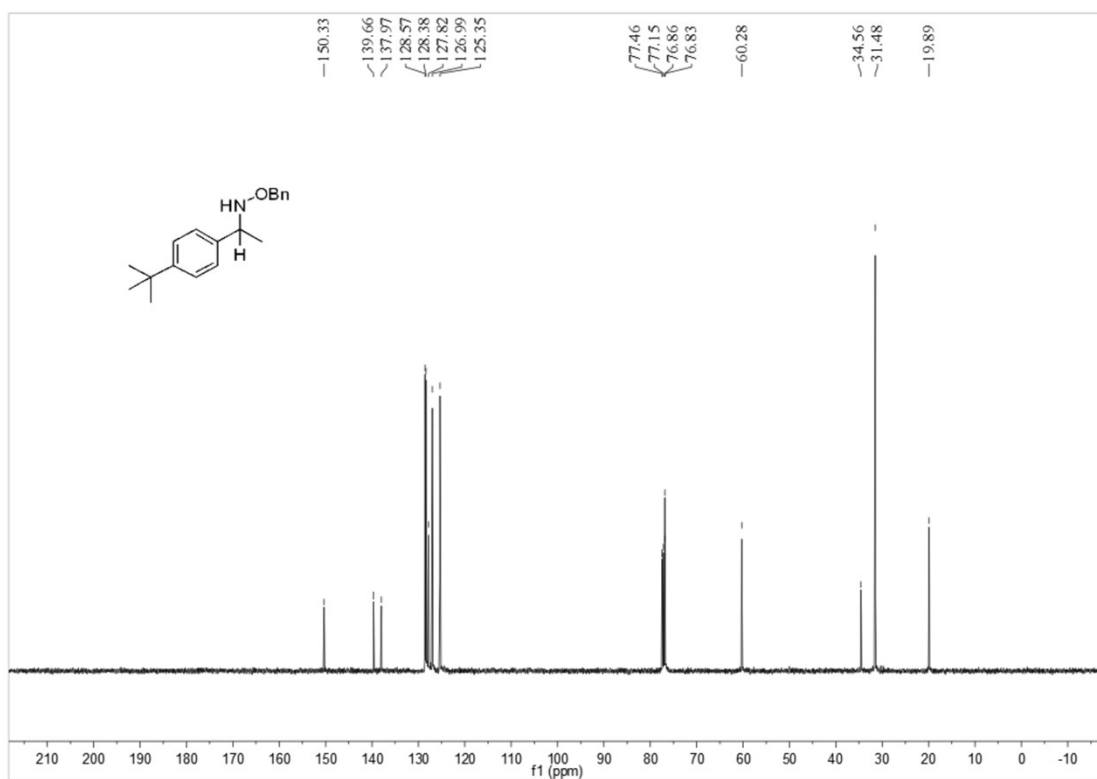

**<sup>1</sup>H NMR spectra of *O*-benzyl-*N*-(1-(3-methoxyphenyl)ethyl)hydroxylamine (2d)**

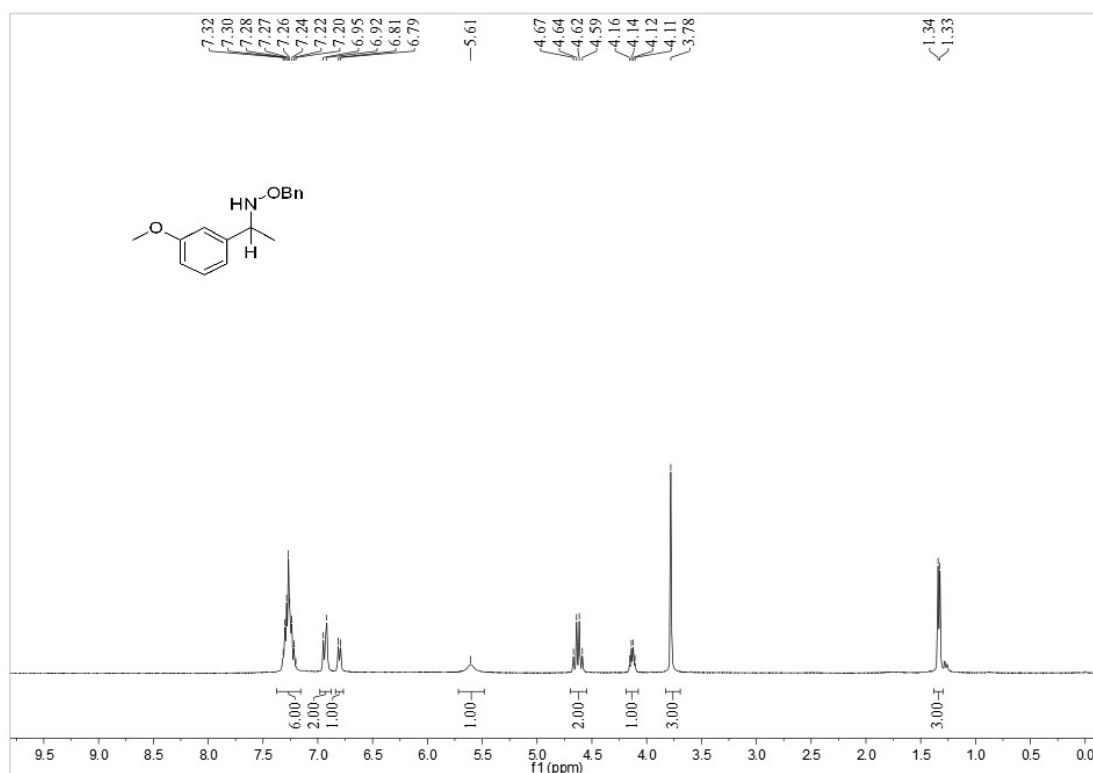

**<sup>13</sup>C NMR spectra of *O*-benzyl-*N*-(1-(3-methoxyphenyl)ethyl)hydroxylamine (2d)**

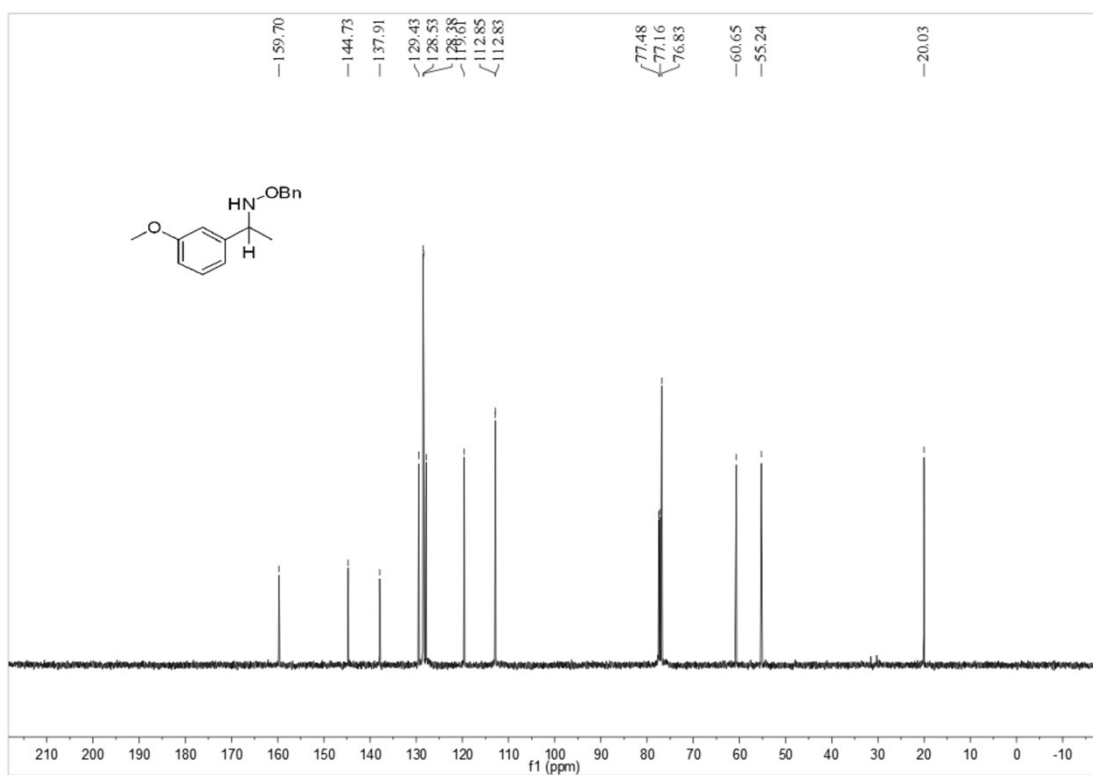

**<sup>1</sup>H NMR spectra of *O*-benzyl-*N*-(1-(4-isopropylphenyl)ethyl)hydroxylamine (2e)**

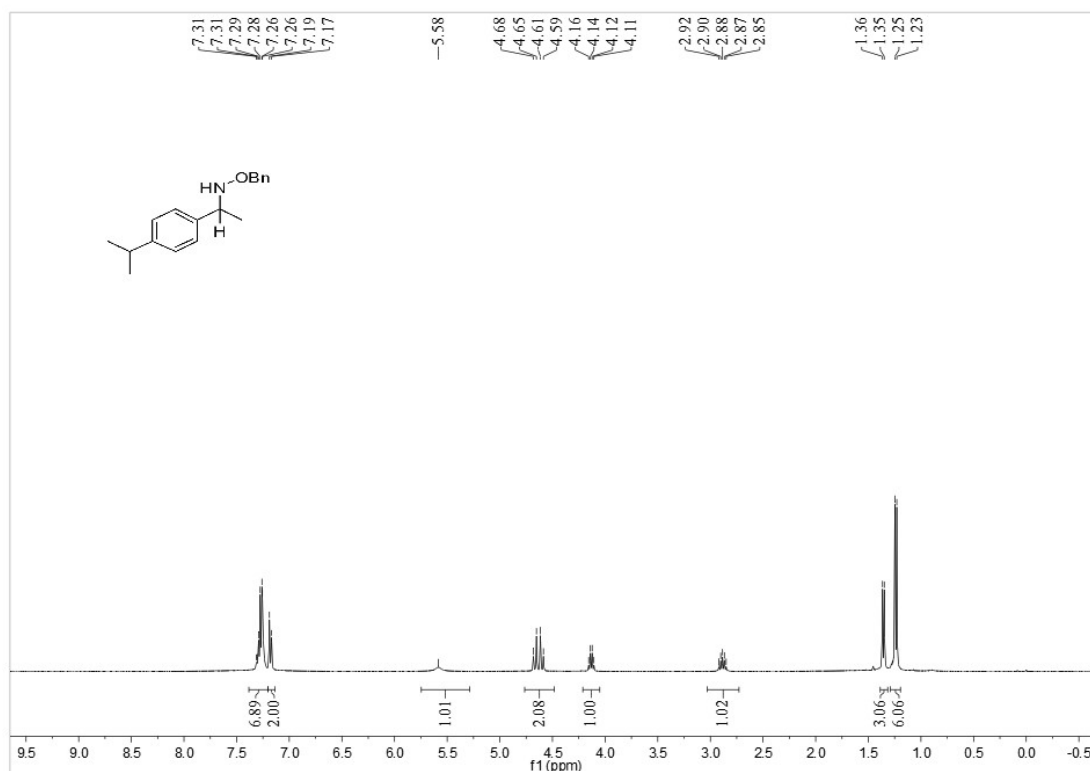

**<sup>13</sup>C NMR spectra of *O*-benzyl-*N*-(1-(4-isopropylphenyl)ethyl)hydroxylamine (2e)**

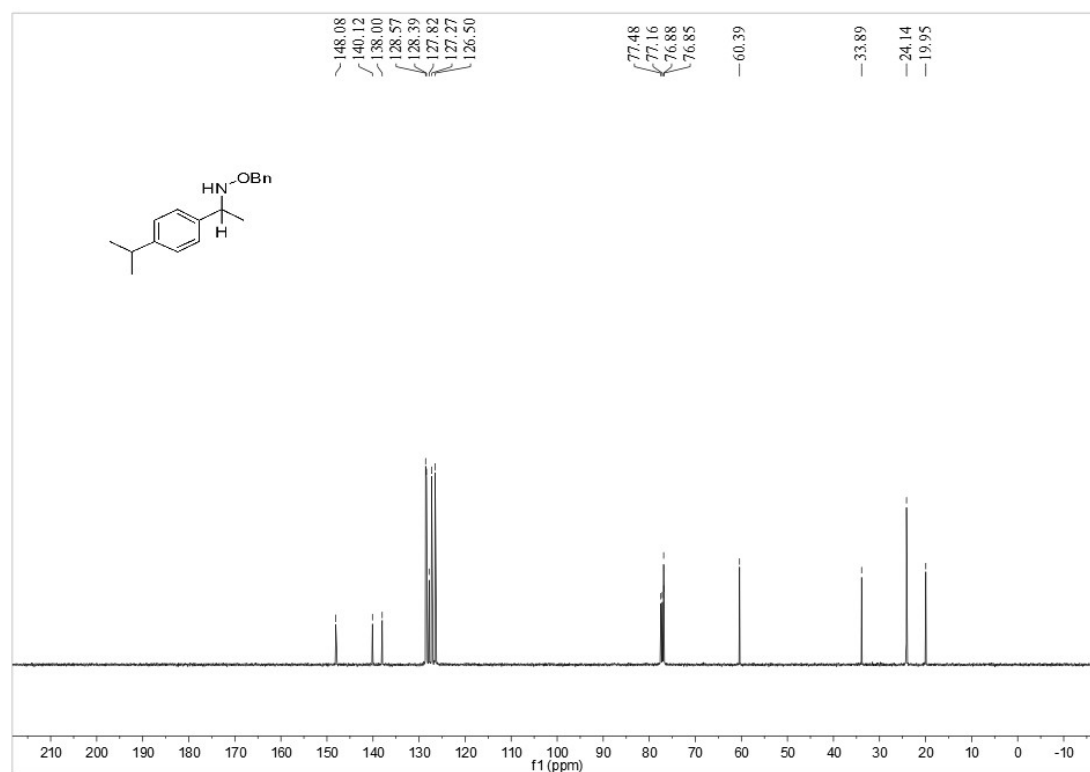

**<sup>1</sup>H NMR spectra of *O*-benzyl-*N*-(1-(4-chlorophenyl)ethyl)hydroxylamine (2f)**

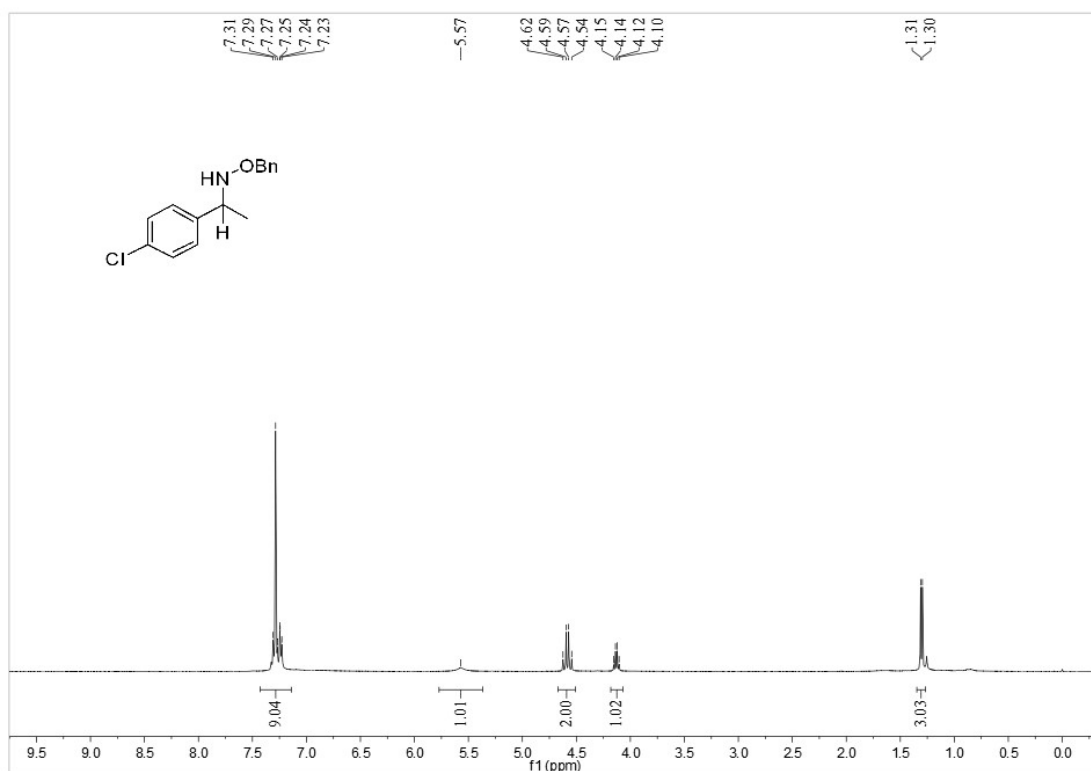

**<sup>13</sup>C NMR spectra of *O*-benzyl-*N*-(1-(4-chlorophenyl)ethyl)hydroxylamine (2f)**

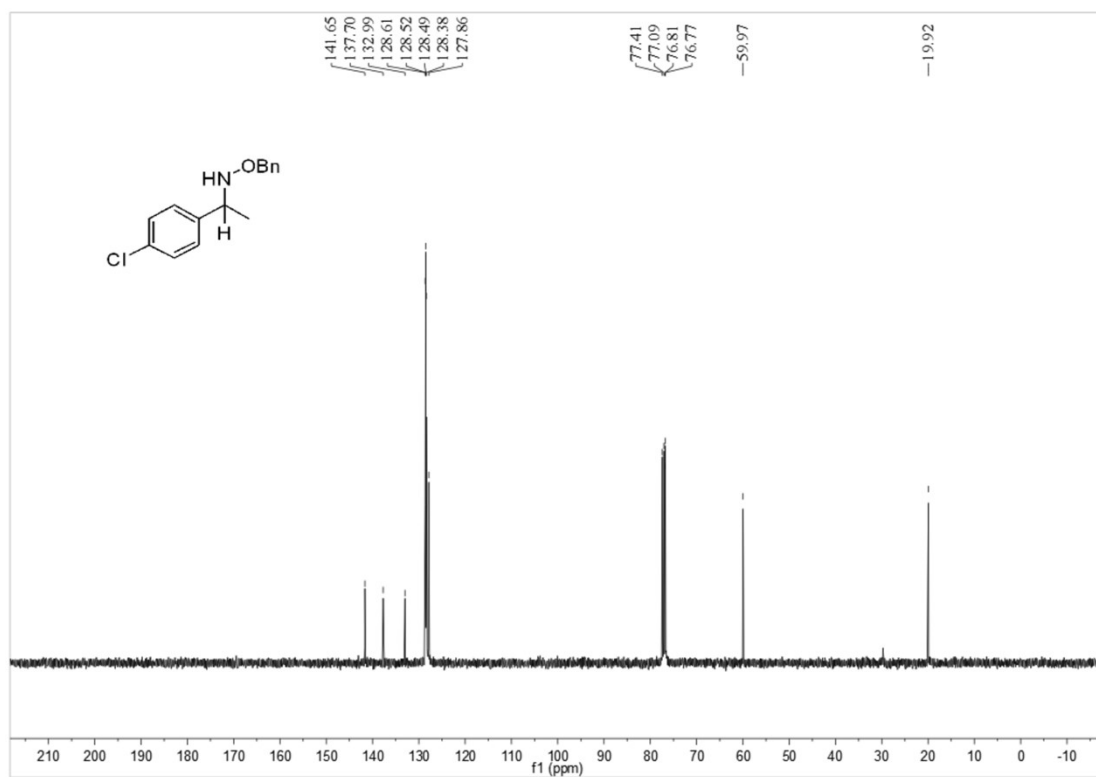



**<sup>1</sup>H NMR spectra of *O*-benzyl-*N*-(1-(4-bromophenyl)ethyl)hydroxylamine (2g)**

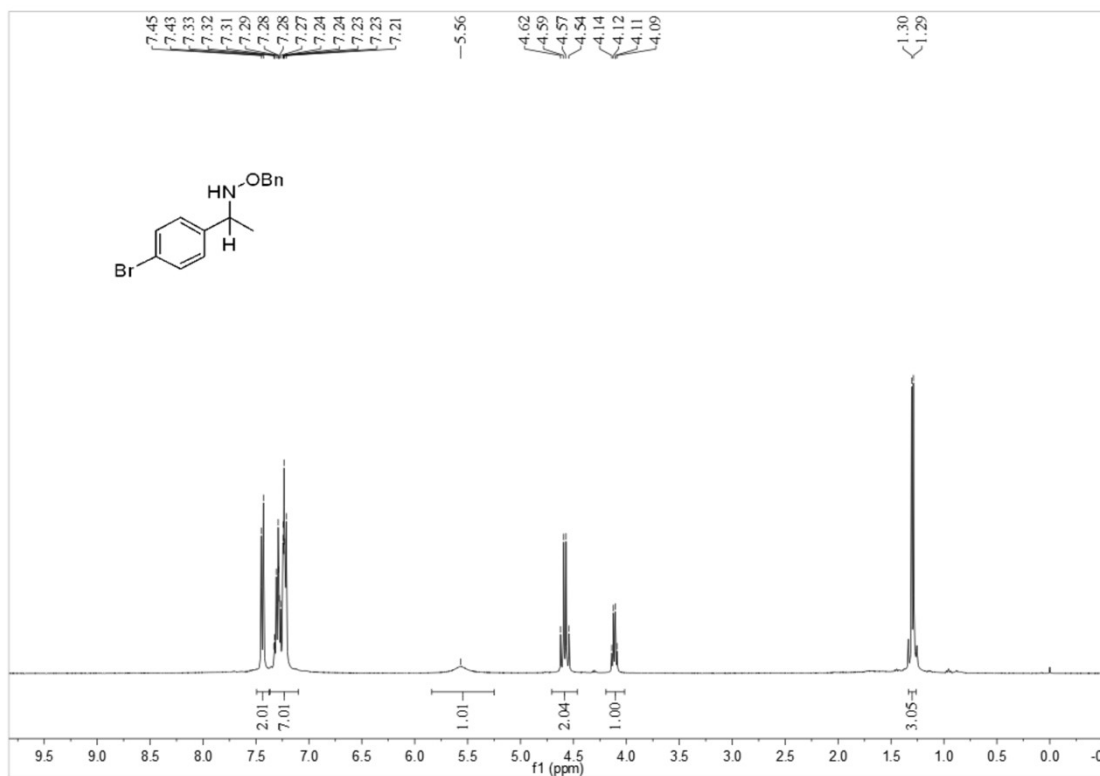

**<sup>13</sup>C NMR spectra of *O*-benzyl-*N*-(1-(4-bromophenyl)ethyl)hydroxylamine (2g)**

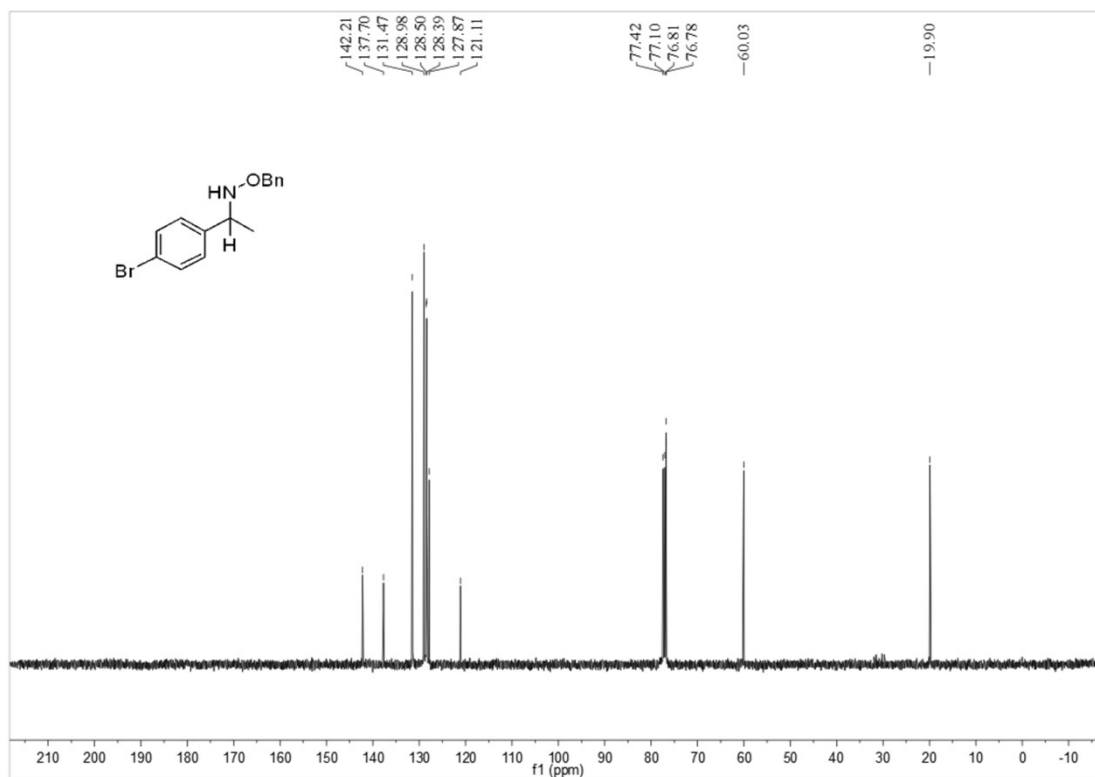

**<sup>1</sup>H NMR spectra of *O*-benzyl-*N*-(1-(3-(trifluoromethyl)phenyl)ethyl)hydroxylamine (2h)**

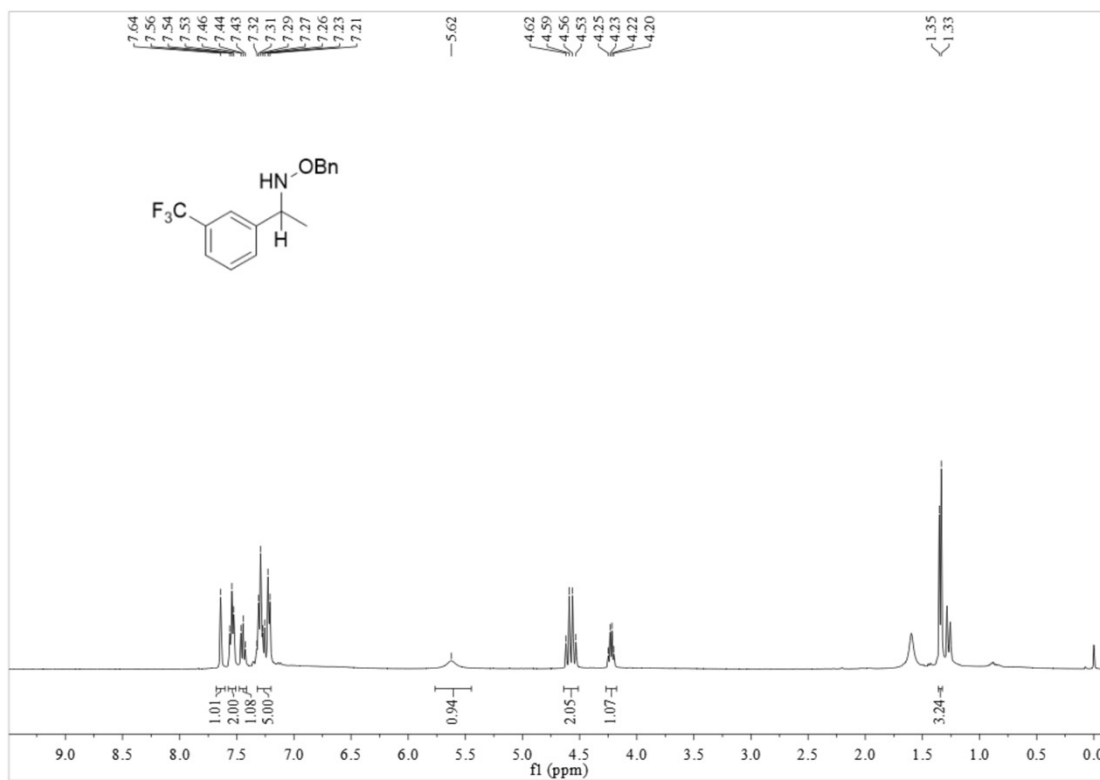

**<sup>13</sup>C NMR spectra of *O*-benzyl-*N*-(1-(3-(trifluoromethyl)phenyl)ethyl)hydroxylamine (2h)**

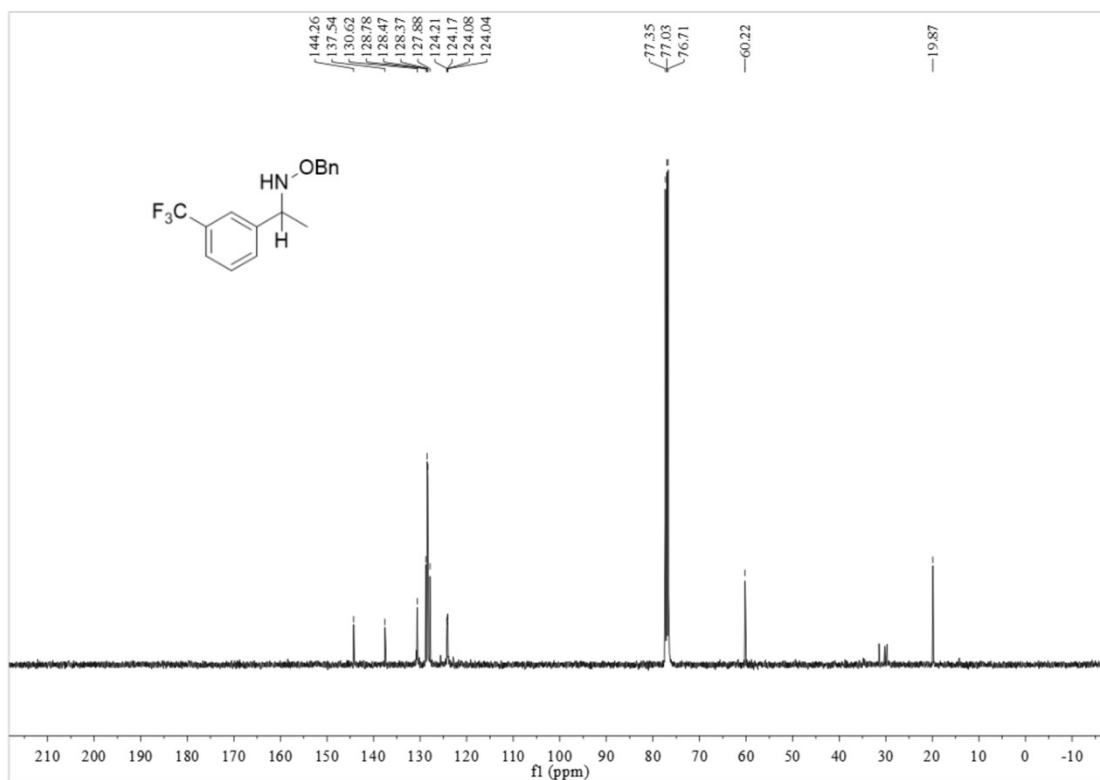

**<sup>1</sup>H NMR spectra of *O*-benzyl-*N*-(1-(2-fluorophenyl)ethyl)hydroxylamine (2i)**

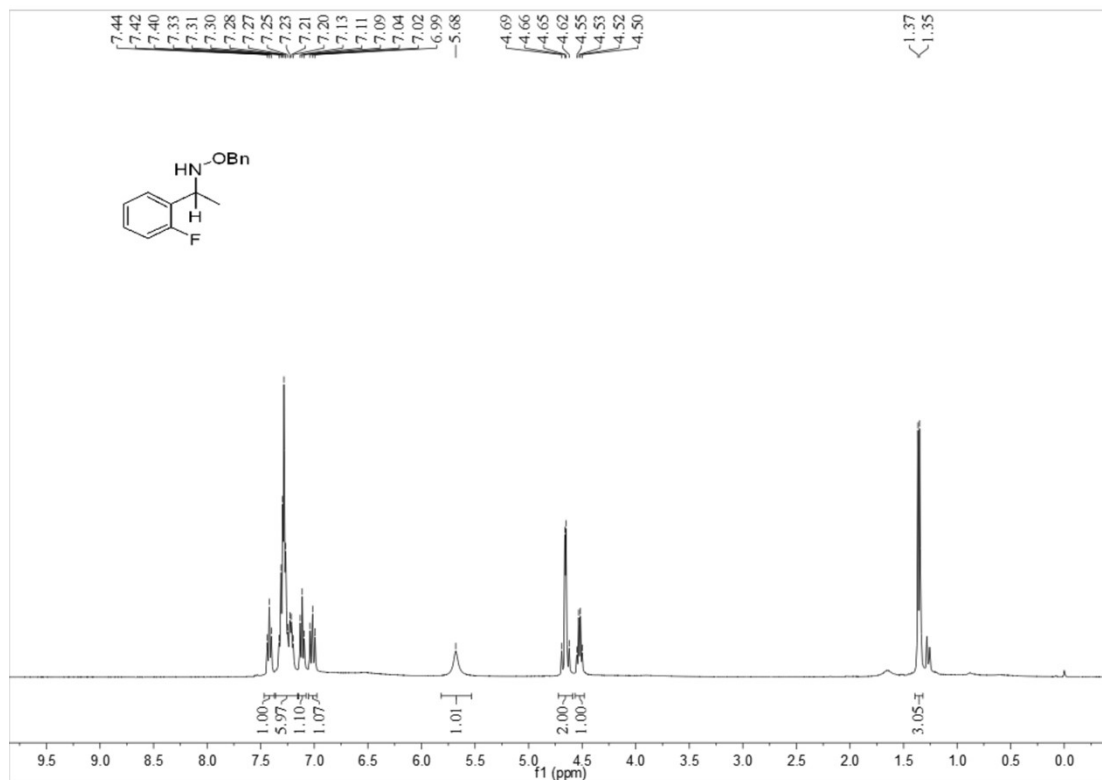

**<sup>13</sup>C NMR spectra of *O*-benzyl-*N*-(1-(2-fluorophenyl)ethyl)hydroxylamine (2i)**

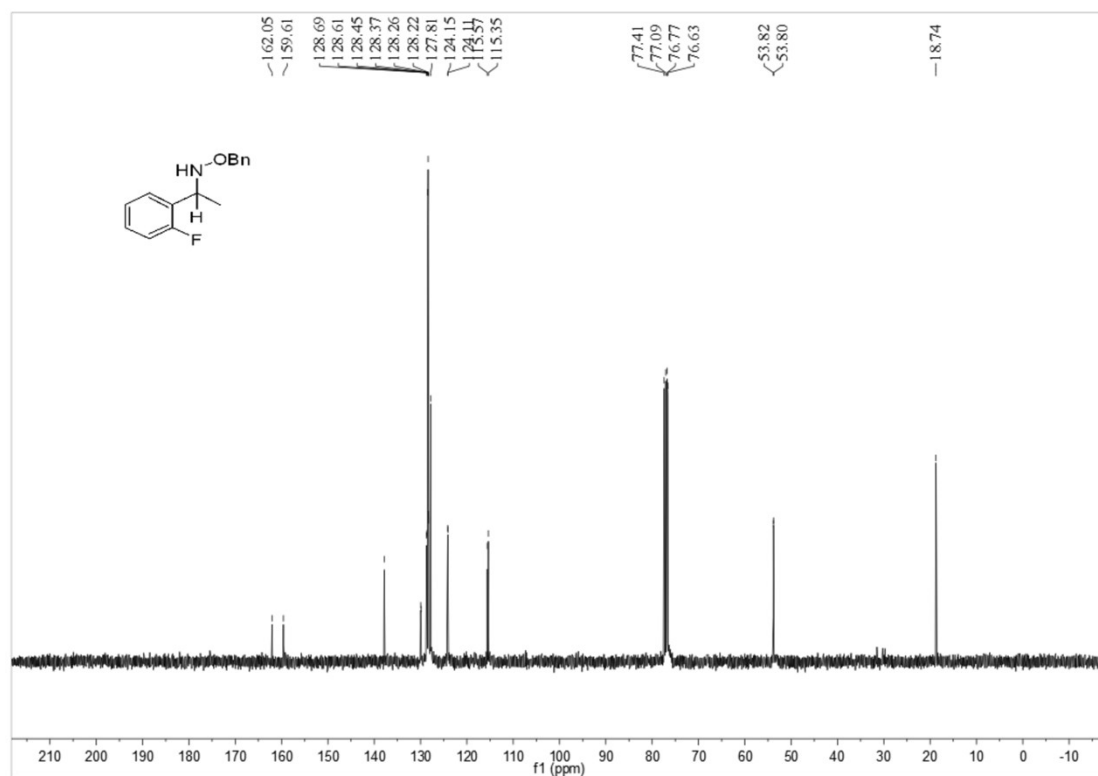

**<sup>1</sup>H NMR spectra of *O*-benzyl-*N*-(1-(3,5-dimethylphenyl)ethyl)hydroxylamine (2j)**

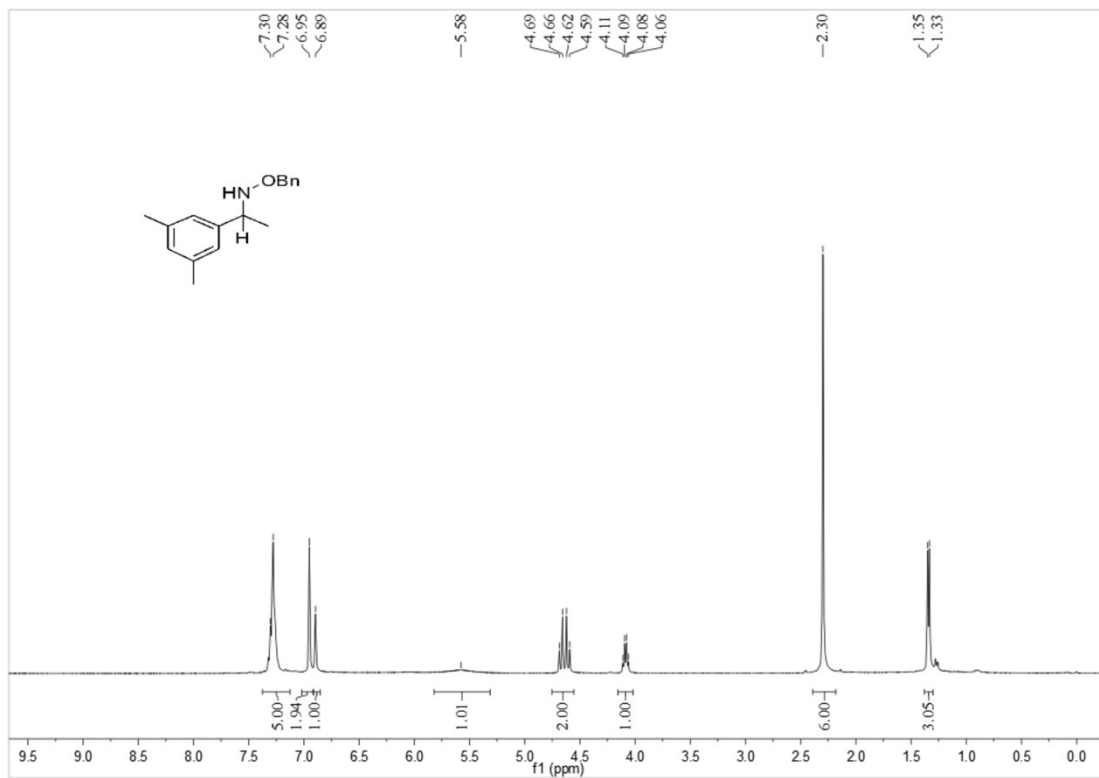

**<sup>13</sup>C NMR spectra of *O*-benzyl-*N*-(1-(3,5-dimethylphenyl)ethyl)hydroxylamine (2j)**

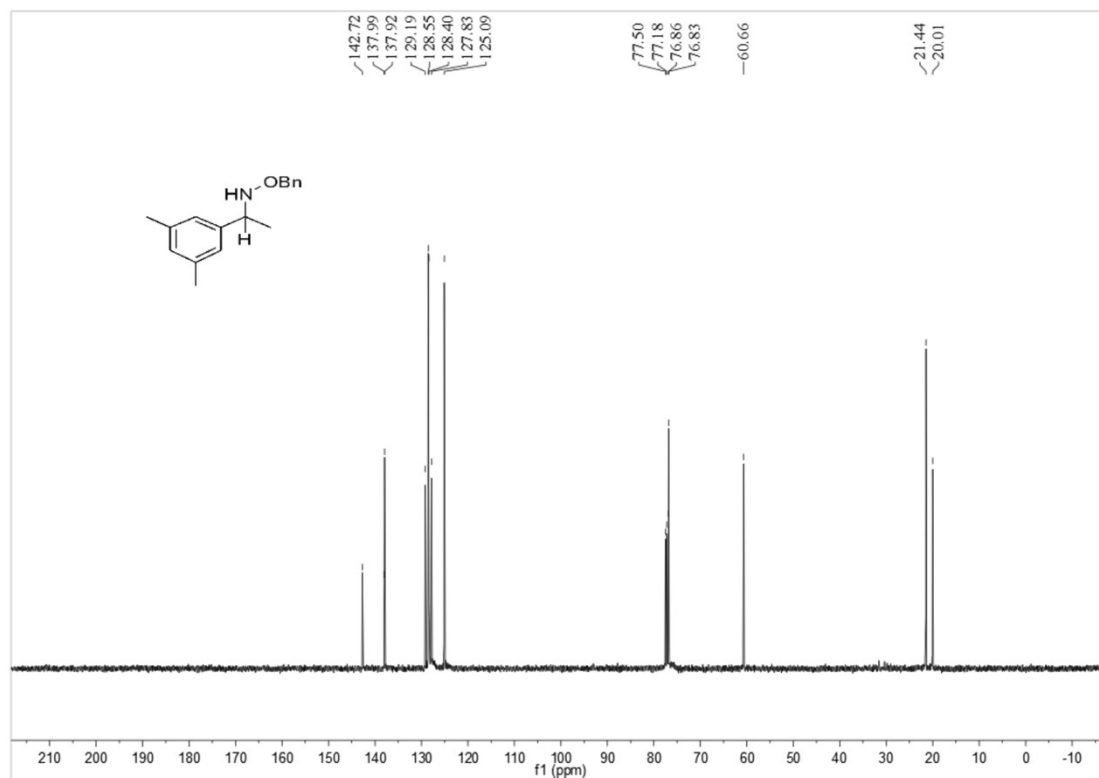

**<sup>1</sup>H NMR spectra of *O*-benzyl-*N*-(1-(4-fluoro-3-methoxyphenyl)ethyl)hydroxylamine (2k)**

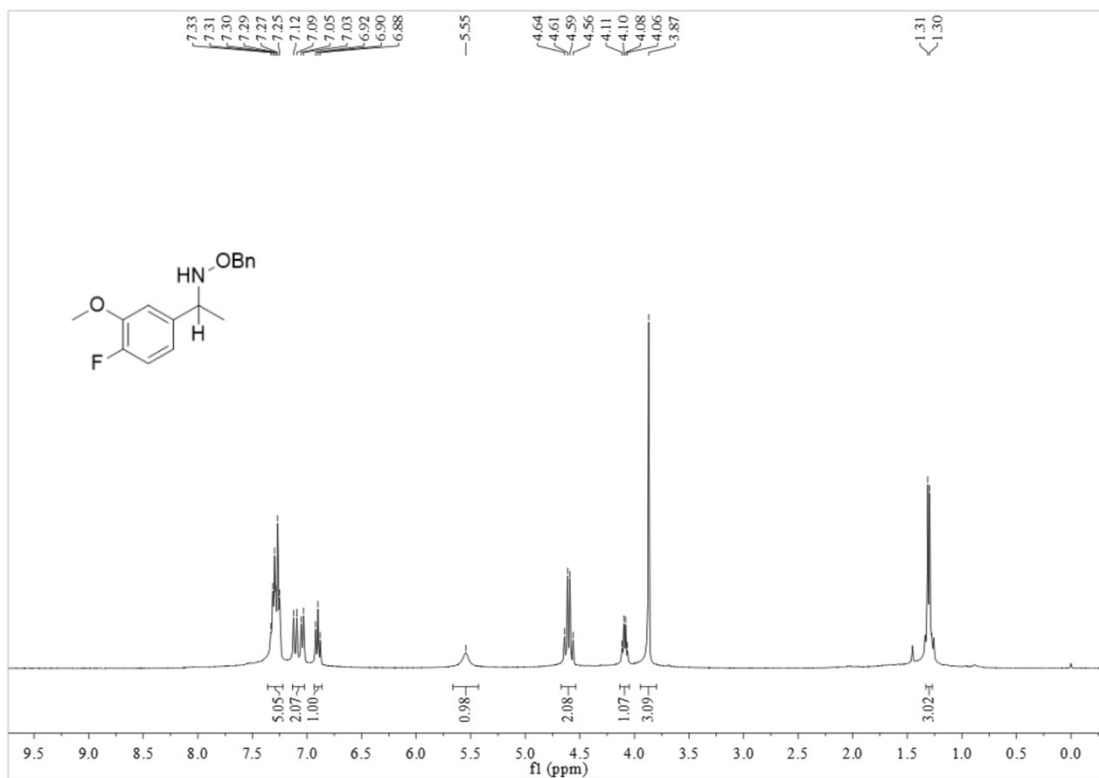

**<sup>13</sup>C NMR spectra of *O*-benzyl-*N*-(1-(4-fluoro-3-methoxyphenyl)ethyl)hydroxylamine (2k)**

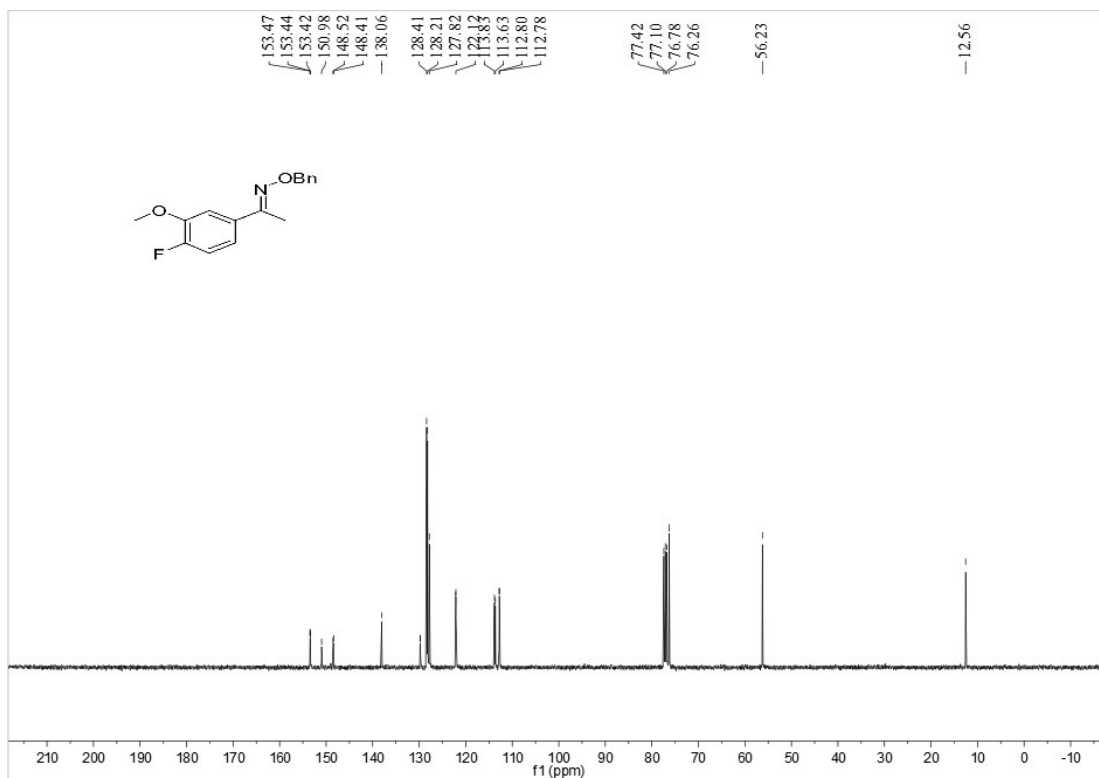

**<sup>1</sup>H NMR spectra of *O*-benzyl-*N*-(1-(naphthalen-2-yl)ethyl)hydroxylamine (21)**

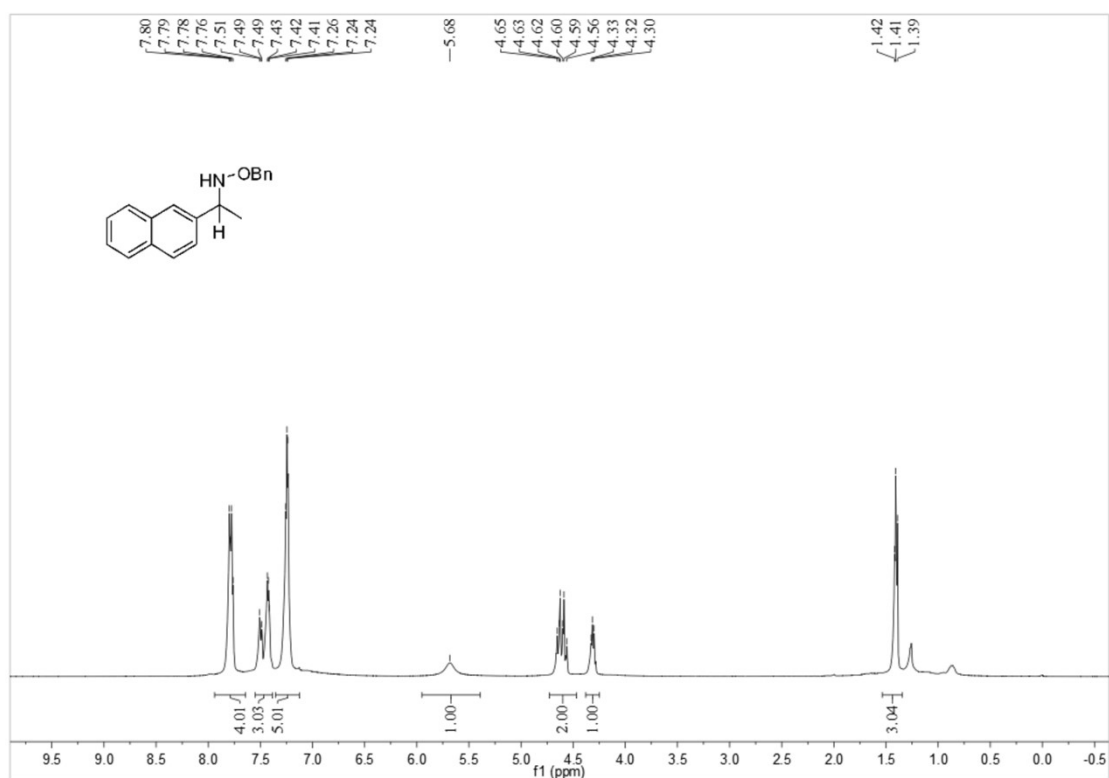

**<sup>13</sup>C NMR spectra of *O*-benzyl-*N*-(1-(naphthalen-2-yl)ethyl)hydroxylamine (21)**

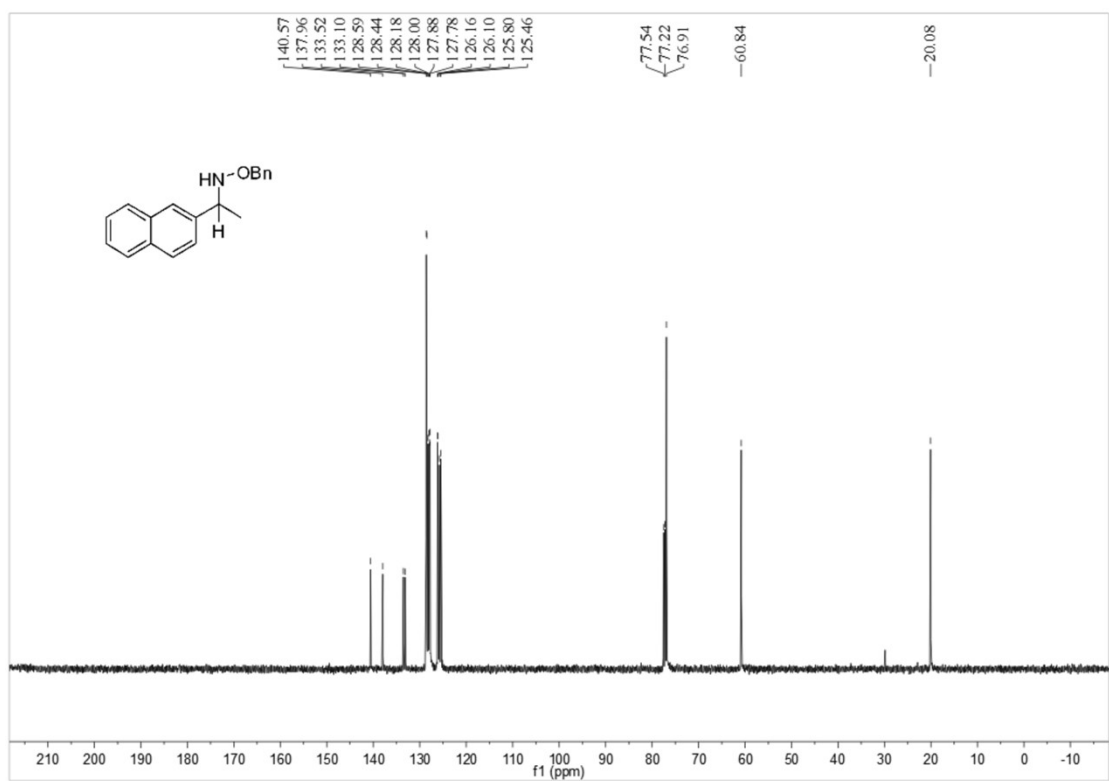

**<sup>1</sup>H NMR spectra of *O*-benzyl-*N*-(1-(6-methylpyridin-2-yl)ethyl)hydroxylamine (2m)**

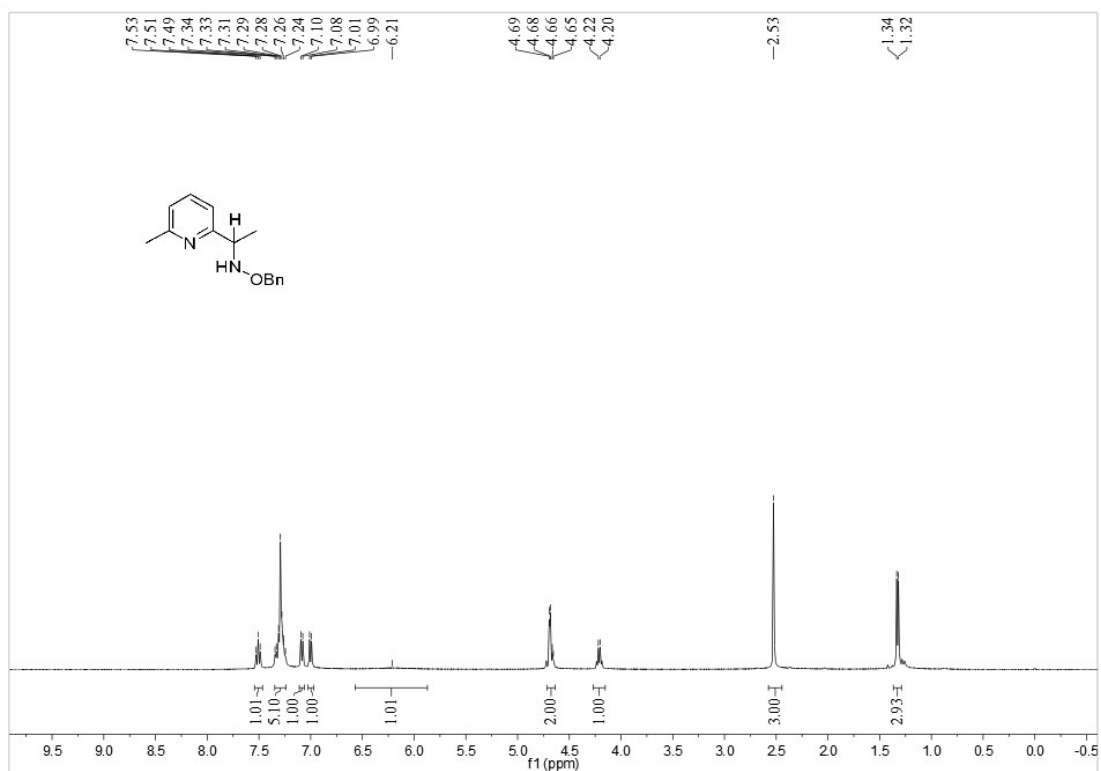

**<sup>13</sup>C NMR spectra of *O*-benzyl-*N*-(1-(6-methylpyridin-2-yl)ethyl)hydroxylamine (2m)**

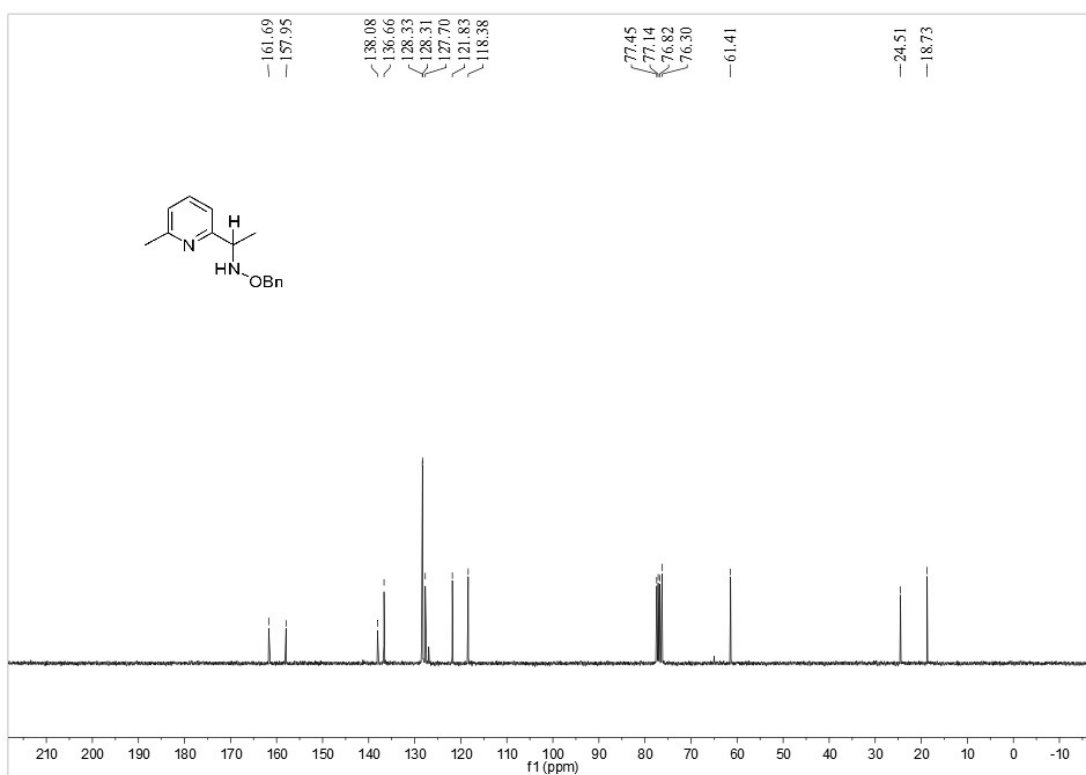

**<sup>1</sup>H NMR spectra of *O*-benzyl-*N*-(1-(thiophen-2-yl)ethyl)hydroxylamine (2n)**

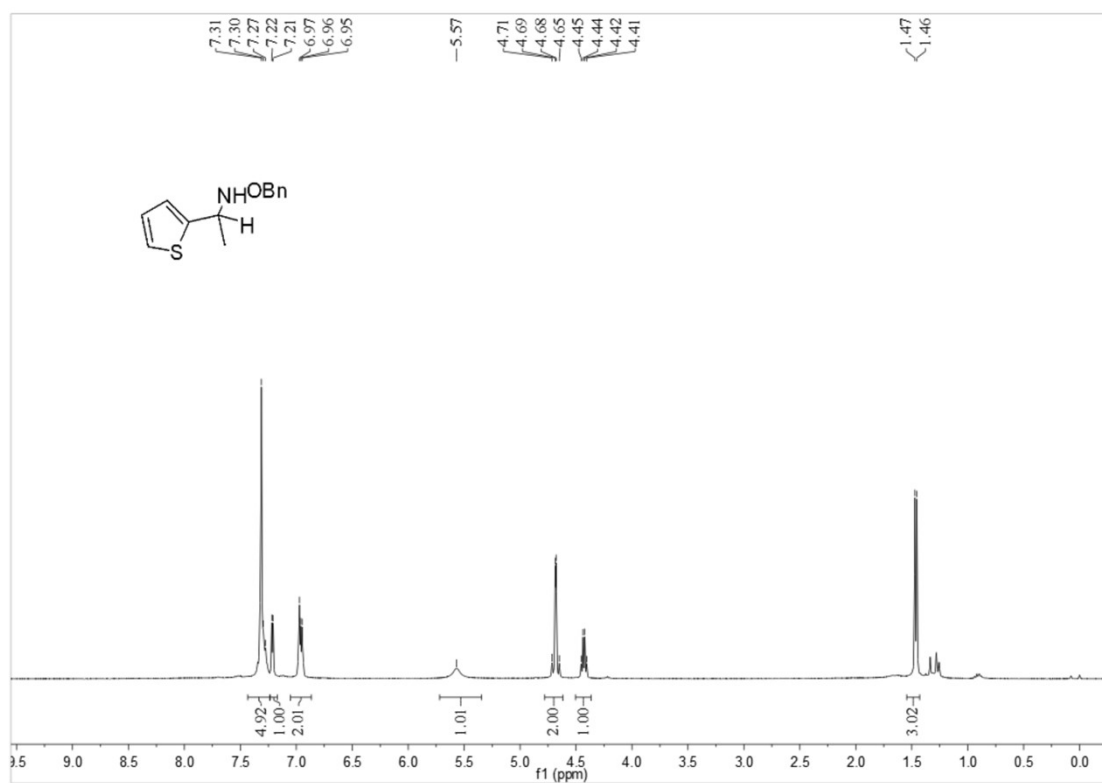

**<sup>13</sup>C NMR spectra of *O*-benzyl-*N*-(1-(thiophen-2-yl)ethyl)hydroxylamine (2n)**

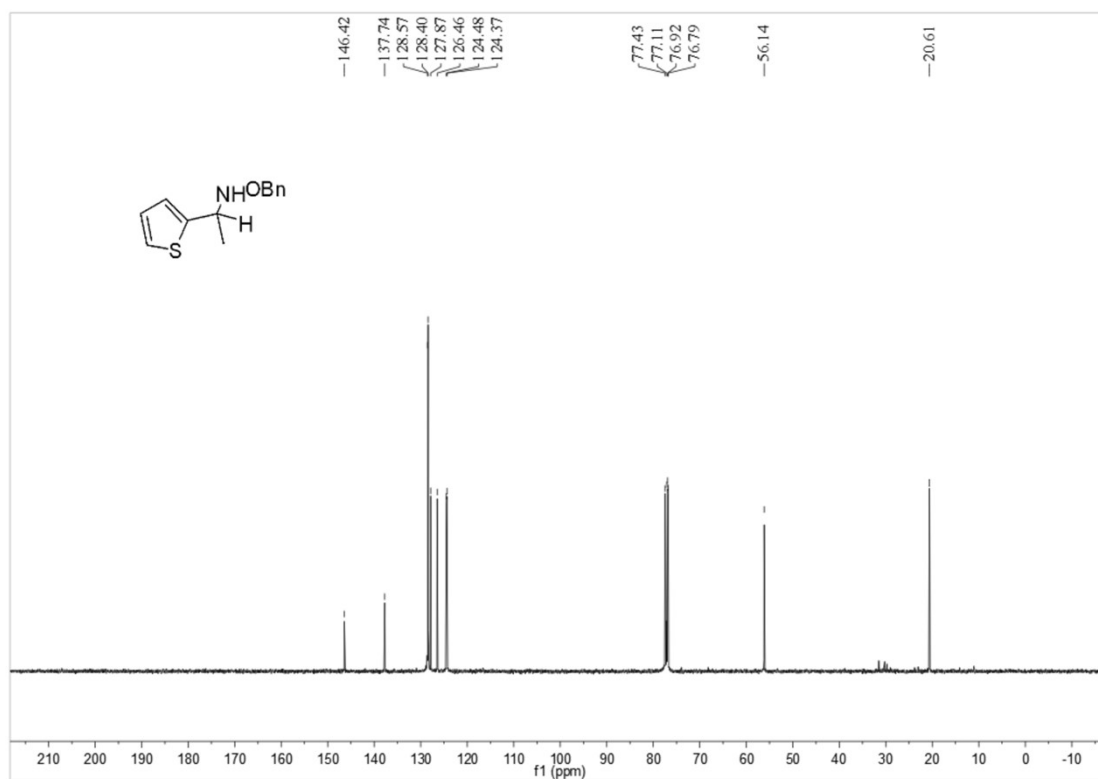



**<sup>1</sup>H NMR spectra of *O*-benzyl-*N*-(2,3-dihydro-1H-inden-1-yl)hydroxylamine (2o)**

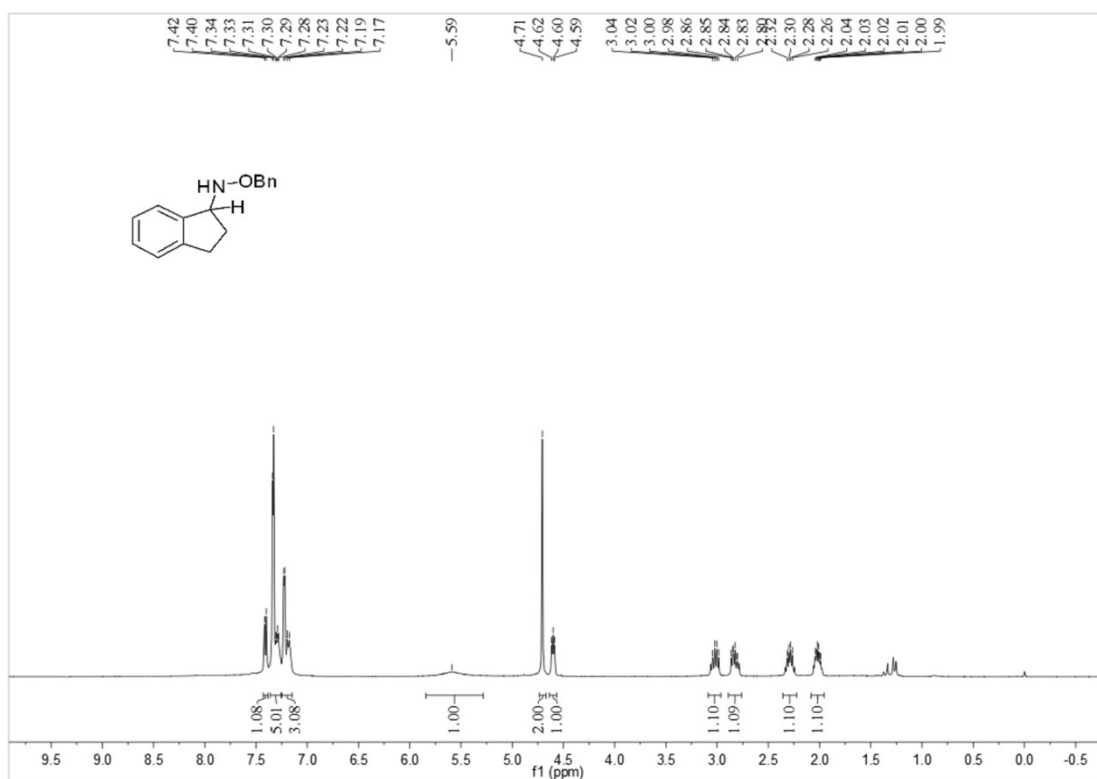

**<sup>13</sup>C NMR spectra of *O*-benzyl-*N*-(2,3-dihydro-1H-inden-1-yl)hydroxylamine (2o)**

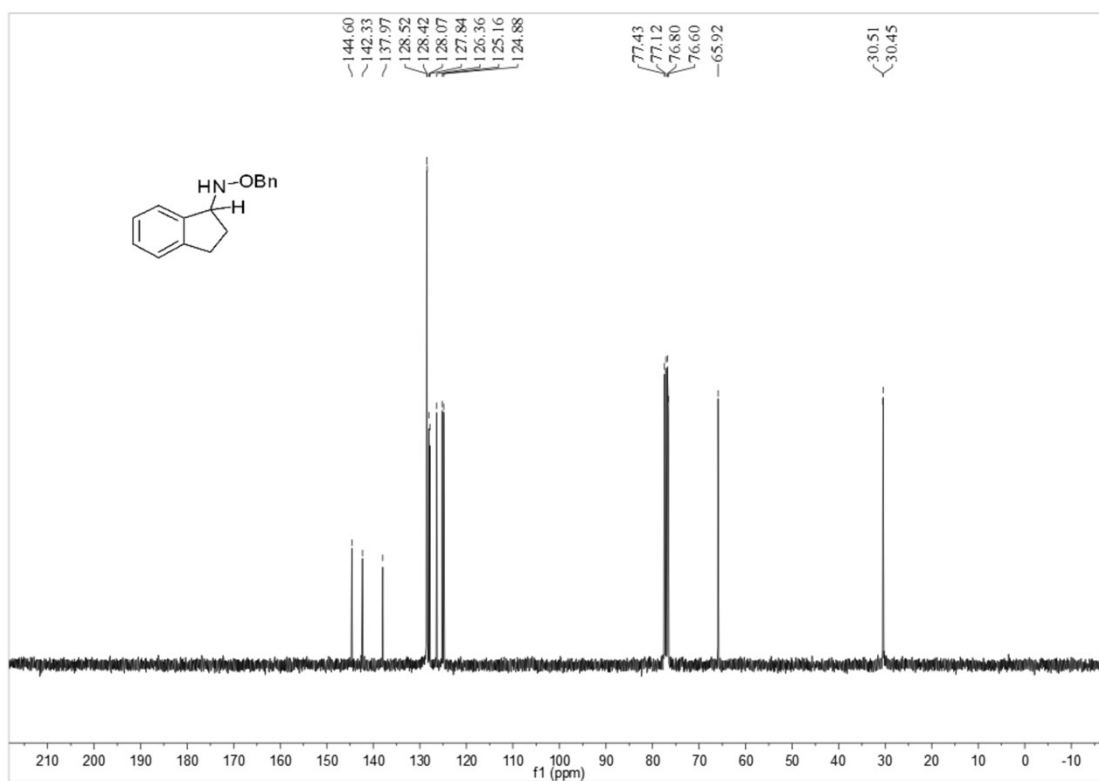

**<sup>1</sup>H NMR spectra of *O*-benzyl-*N*-(7-fluoro-2,3-dihydro-1*H*-inden-1-yl)hydroxylamine (2p)**

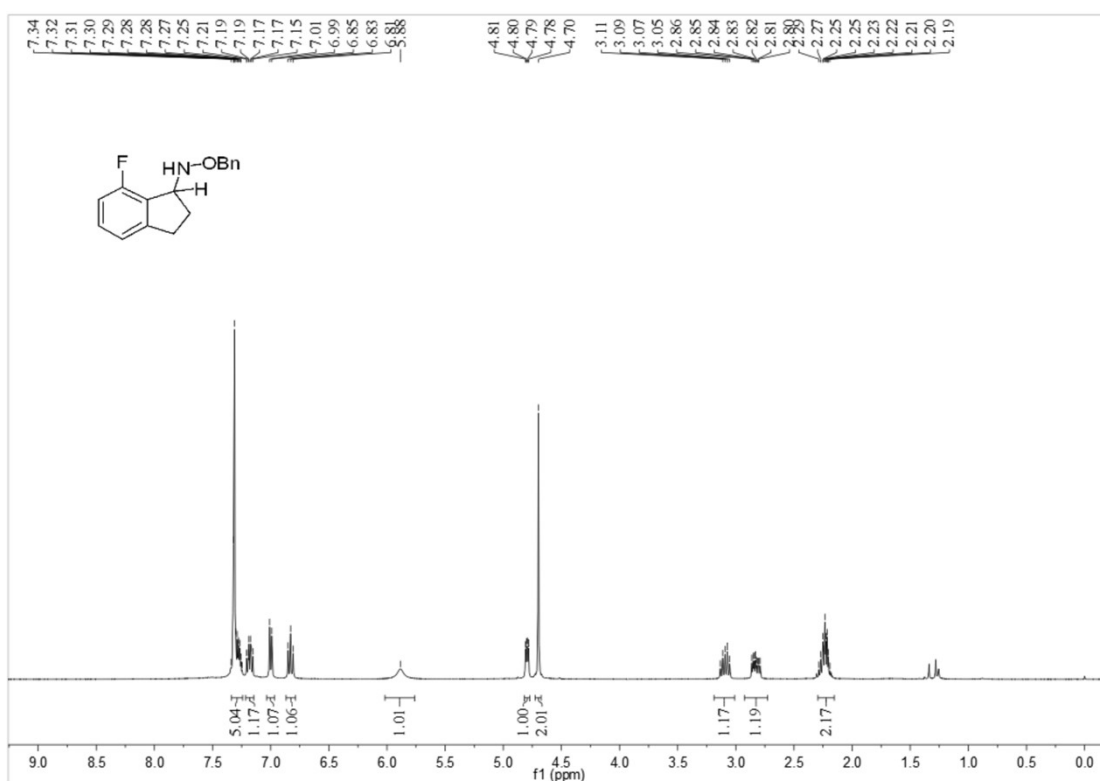

**<sup>13</sup>C NMR spectra of *O*-benzyl-*N*-(7-fluoro-2,3-dihydro-1*H*-inden-1-yl)hydroxylamine (2p)**

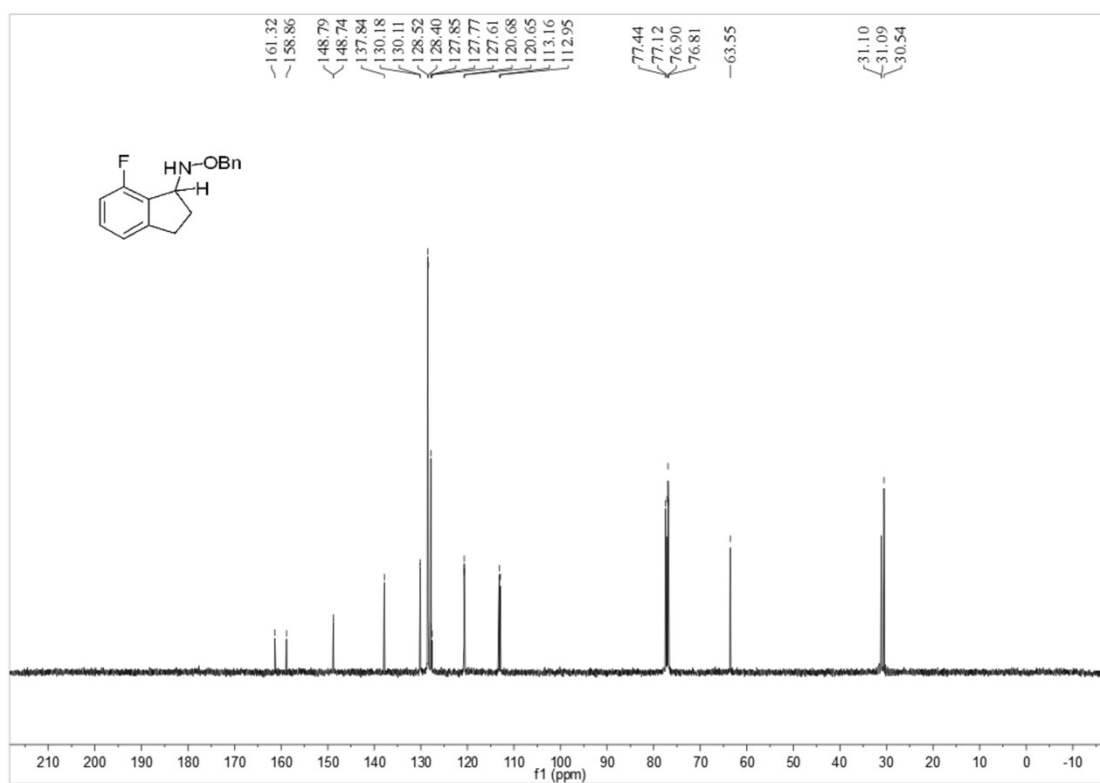

**<sup>1</sup>H NMR spectra of *O*-benzyl-*N*-(5-fluoro-2,3-dihydro-1H-inden-1-yl)hydroxylamine (2q)**

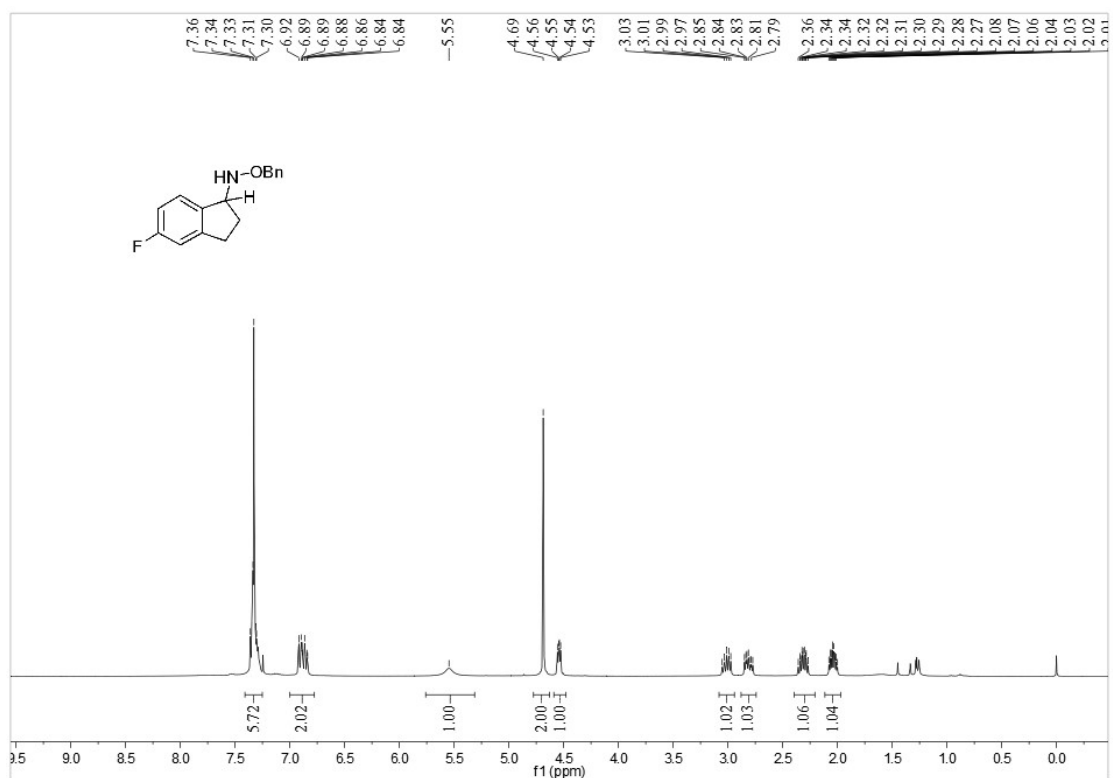

**<sup>13</sup>C NMR spectra of *O*-benzyl-*N*-(5-fluoro-2,3-dihydro-1H-inden-1-yl)hydroxylamine (2q)**

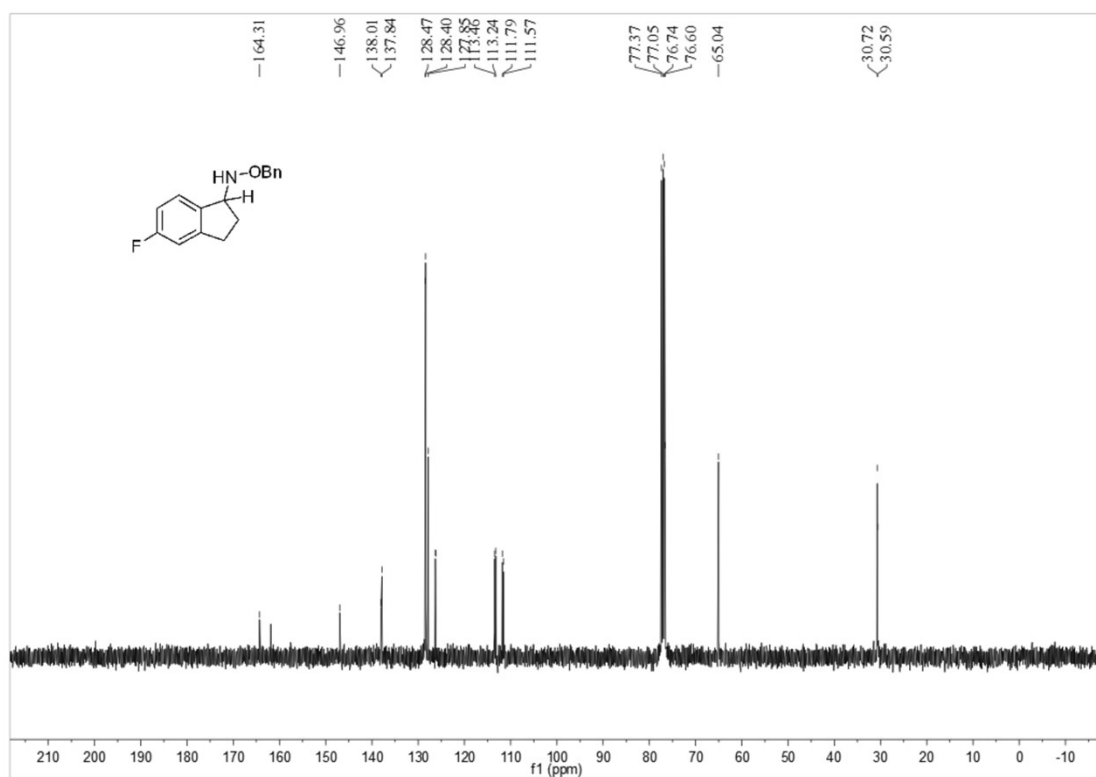

**<sup>1</sup>H NMR spectra of *O*-benzyl-*N*-(6-methyl-2,3-dihydro-1H-inden-1-yl)hydroxylamine (2r)**

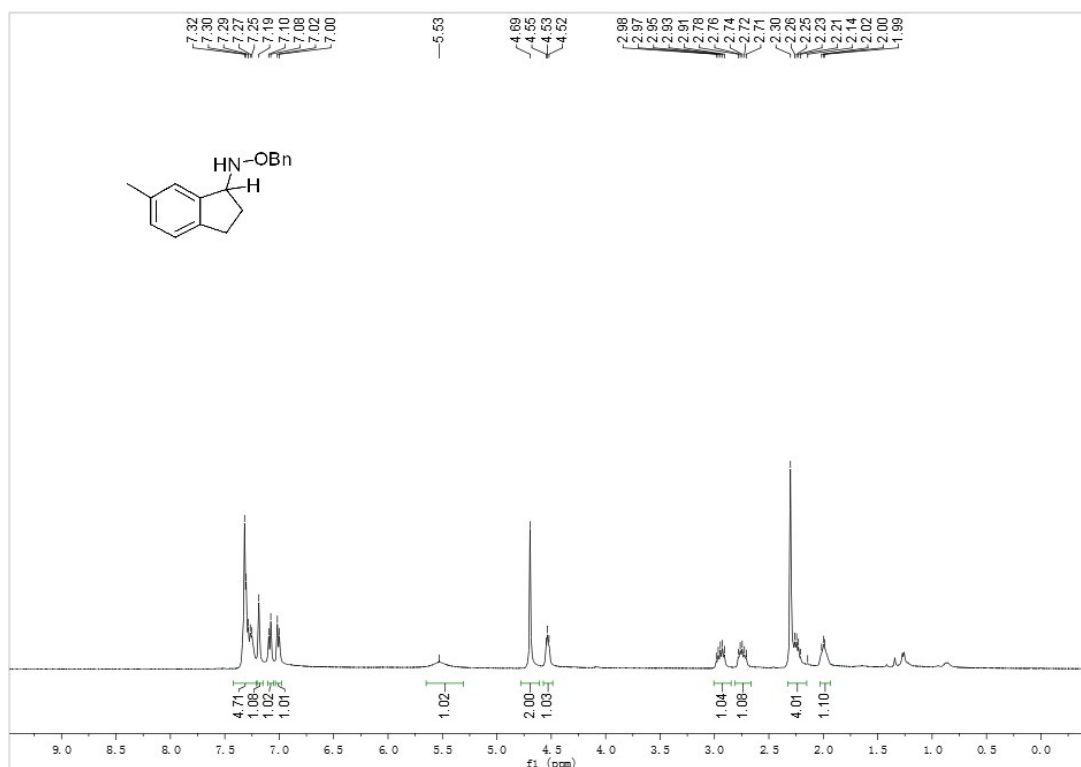

**<sup>13</sup>C NMR spectra of *O*-benzyl-*N*-(6-methyl-2,3-dihydro-1H-inden-1-yl)hydroxylamine (2r)**

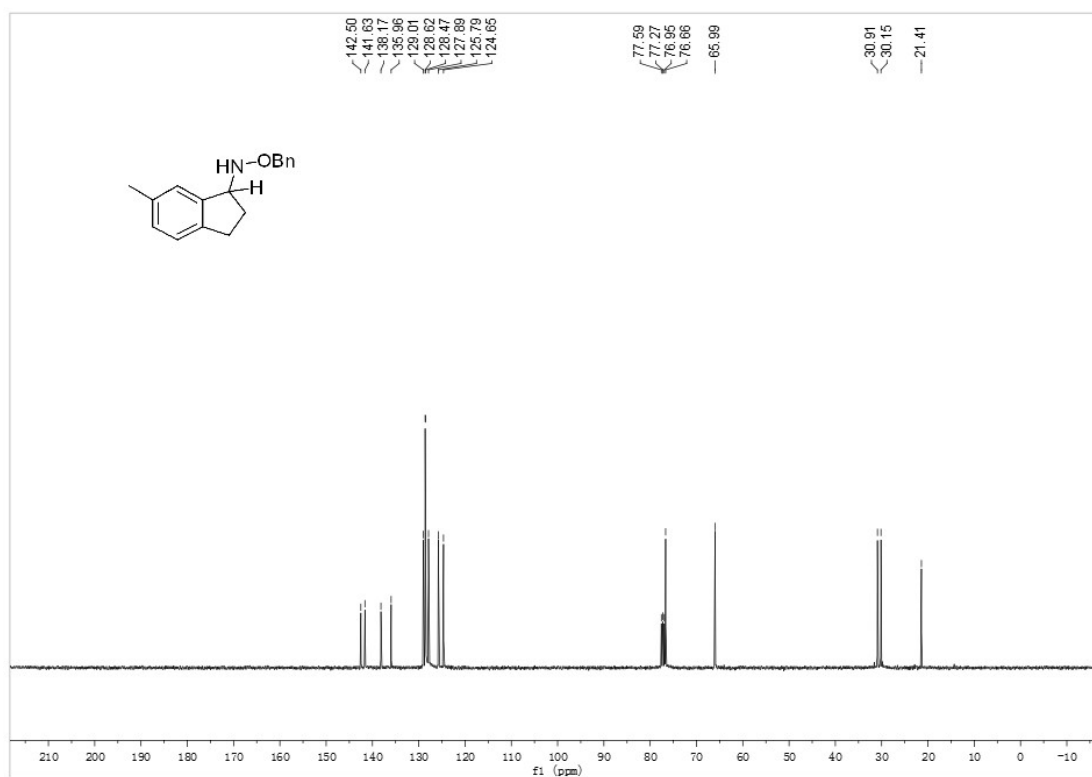

**<sup>1</sup>H NMR spectra of *O*-benzyl-*N*-(1,2,3,4-tetrahydronaphthalen-1-yl)hydroxylamine (2s)**

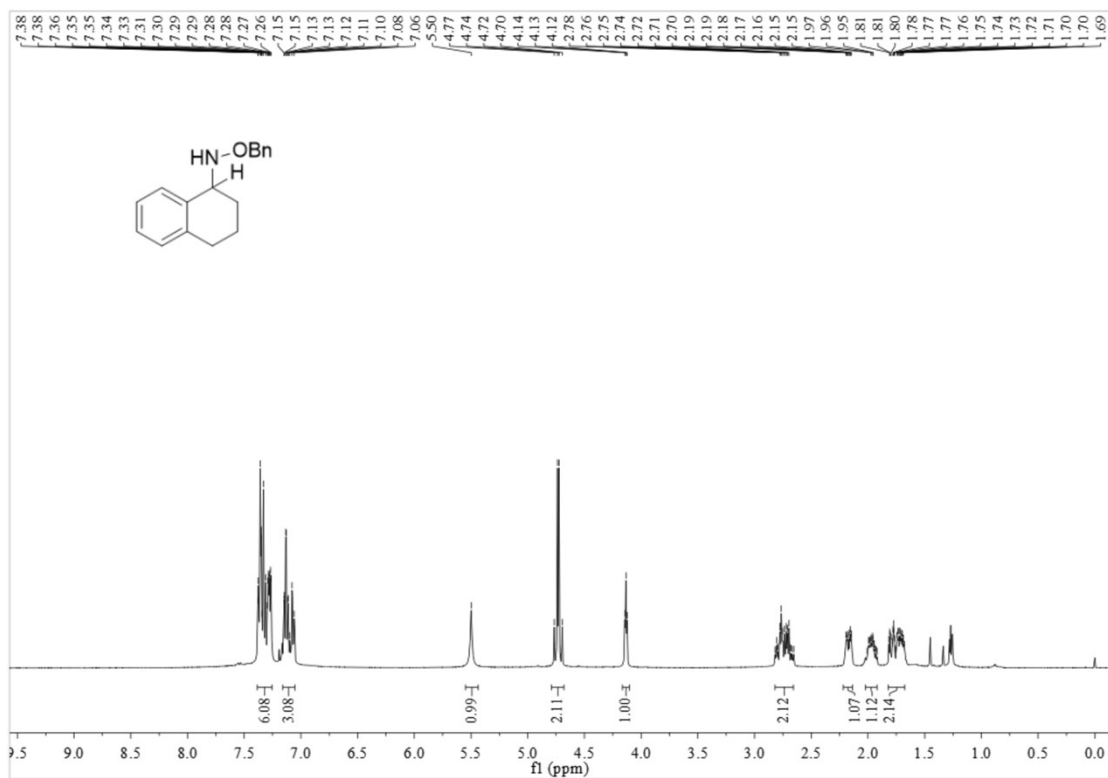

**<sup>13</sup>C NMR spectra of *O*-benzyl-*N*-(1,2,3,4-tetrahydronaphthalen-1-yl)hydroxylamine (2s)**

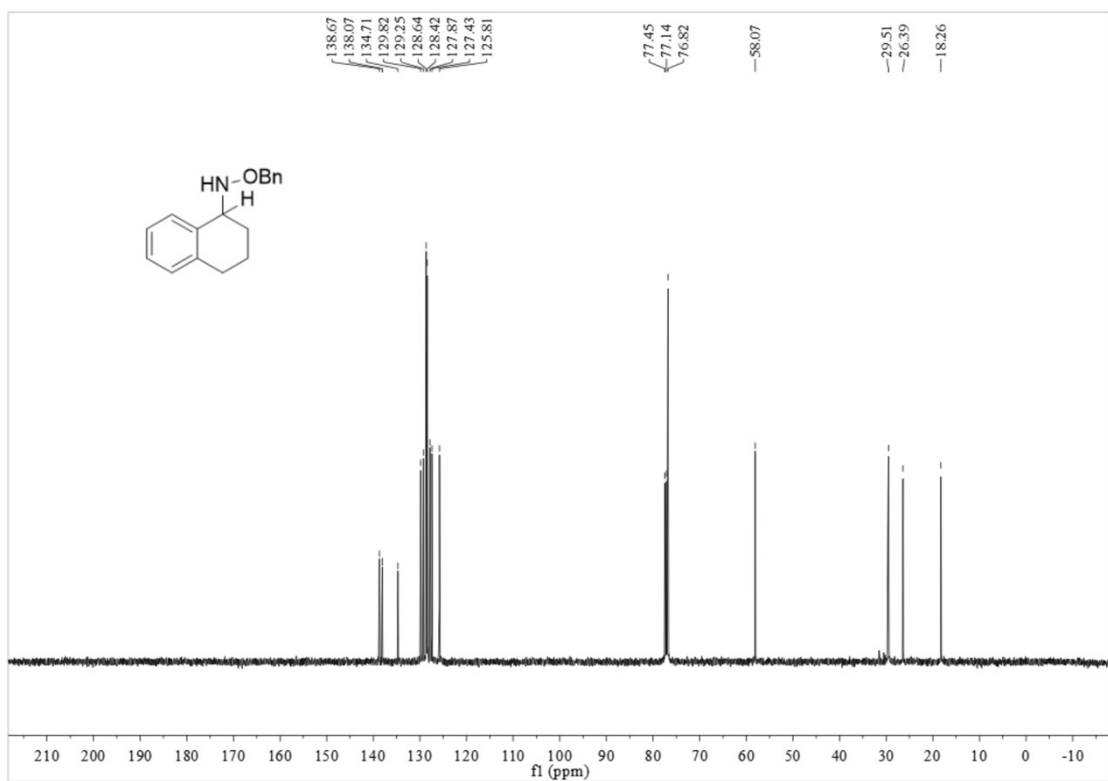

**<sup>1</sup>H NMR spectra of *O*-methyl-*N*-(1,2,3,4-tetrahydronaphthalen-1-yl)hydroxylaminee (2t)**

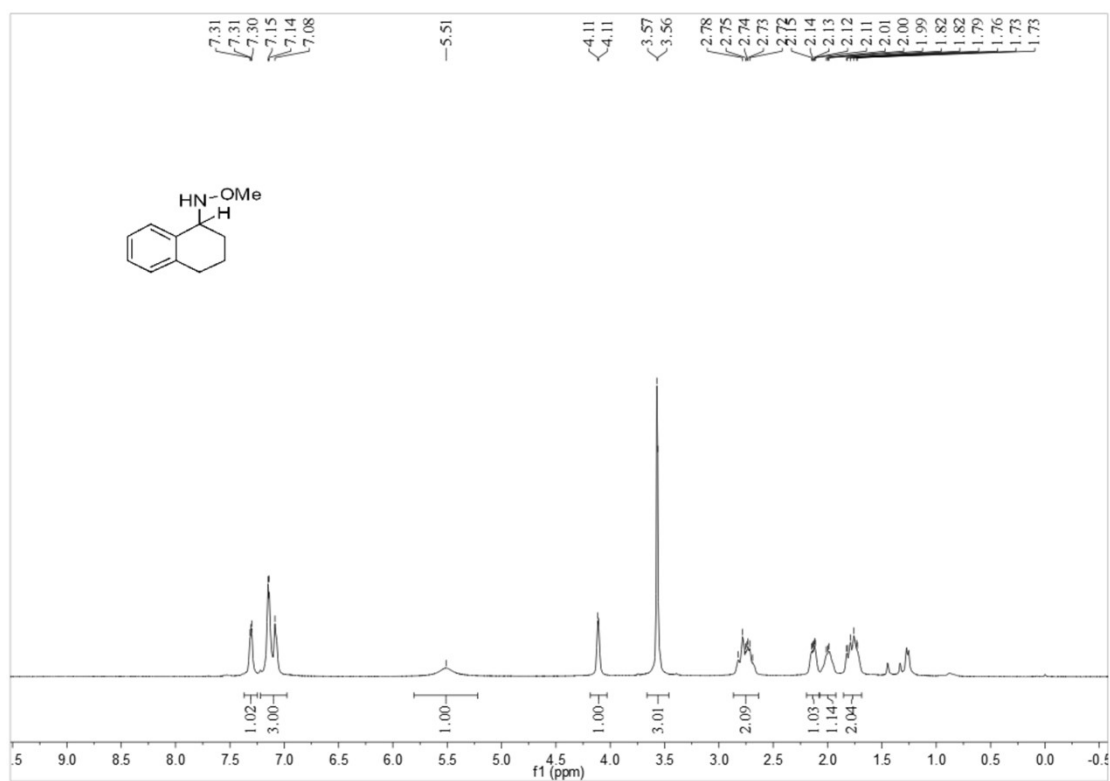

**<sup>13</sup>C NMR spectra of *O*-methyl-*N*-(1,2,3,4-tetrahydronaphthalen-1-yl)hydroxylaminee (2t)**

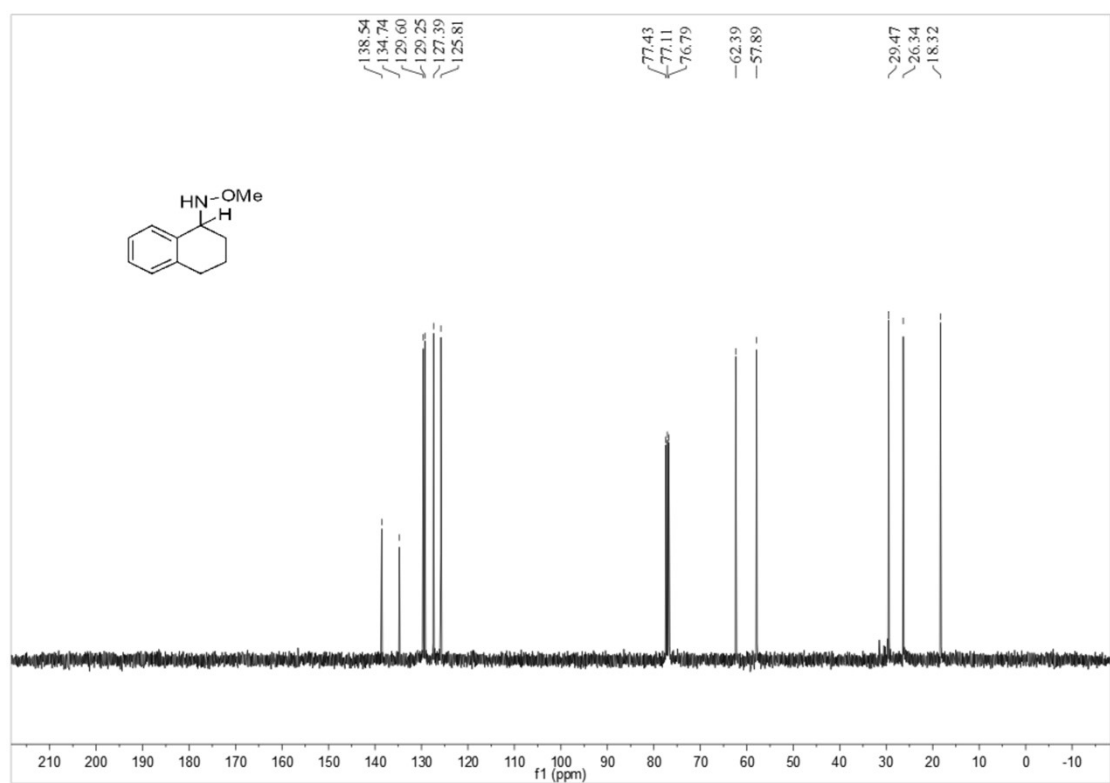

**<sup>1</sup>H NMR spectra of *O*-benzyl-*N*-(7-methoxy-1,2,3,4-tetrahydronaphthalen-1-yl)hydroxylamine (2v):**

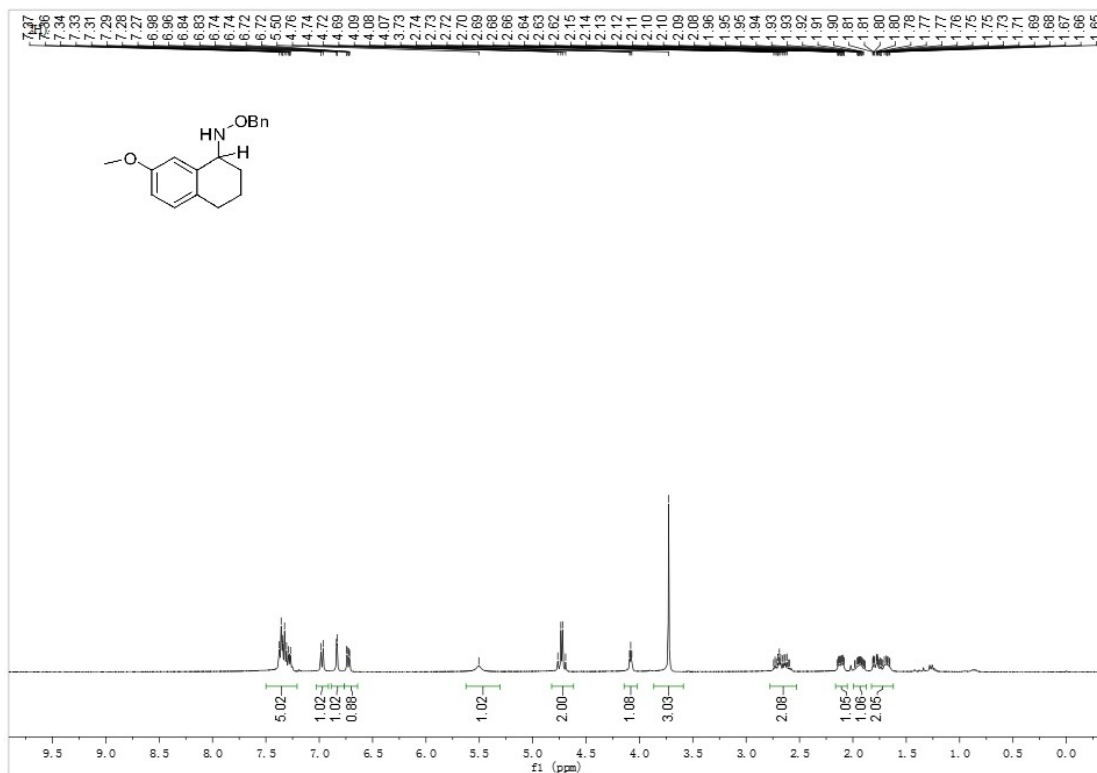

**<sup>13</sup>C NMR spectra of *O*-benzyl-*N*-(7-methoxy-1,2,3,4-tetrahydronaphthalen-1-yl)hydroxylamine (2v):**

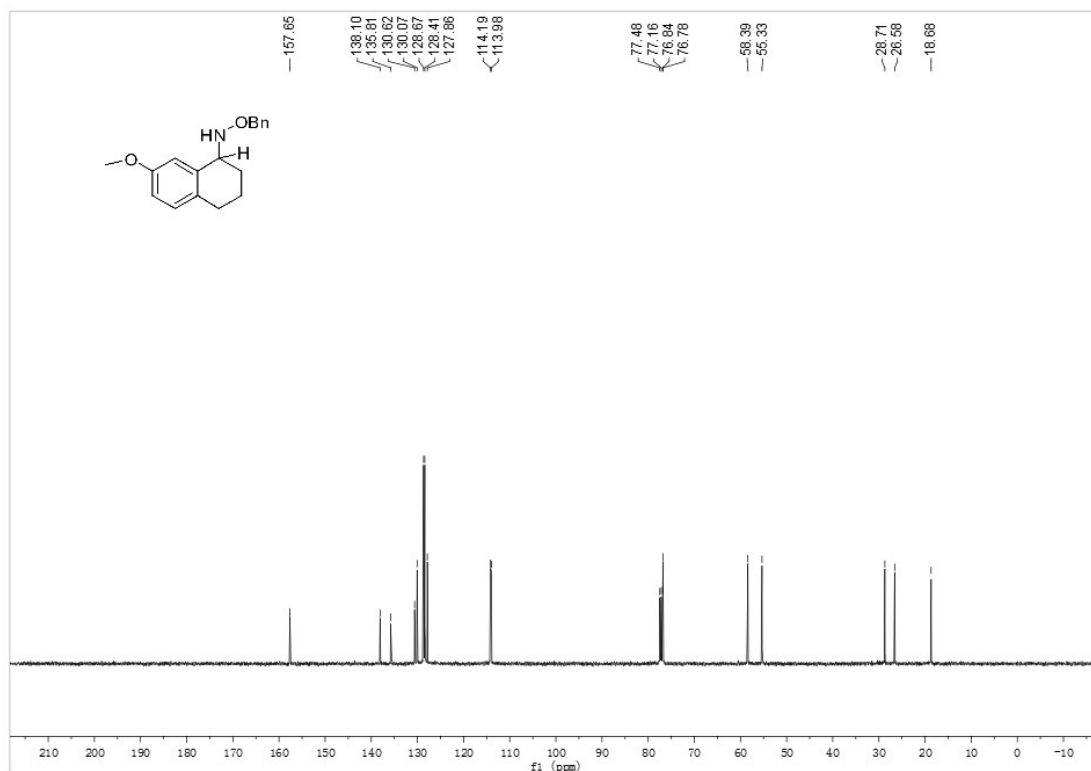

**<sup>1</sup>H NMR spectra of *O*-benzyl-*N*-(6-chloro-1,2,3,4-tetrahydronaphthalen-1-yl)hydroxylamine (2w)**

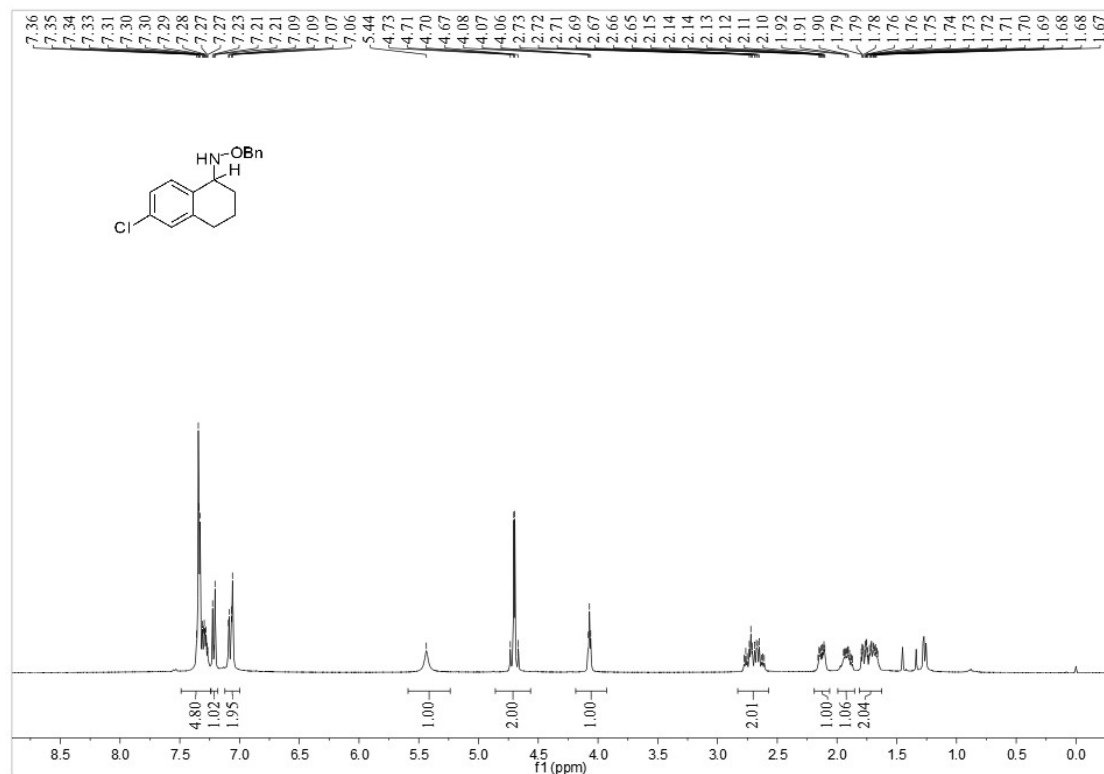

**<sup>13</sup>C NMR spectra of *O*-benzyl-*N*-(6-chloro-1,2,3,4-tetrahydronaphthalen-1-yl)hydroxylamine (2w)**

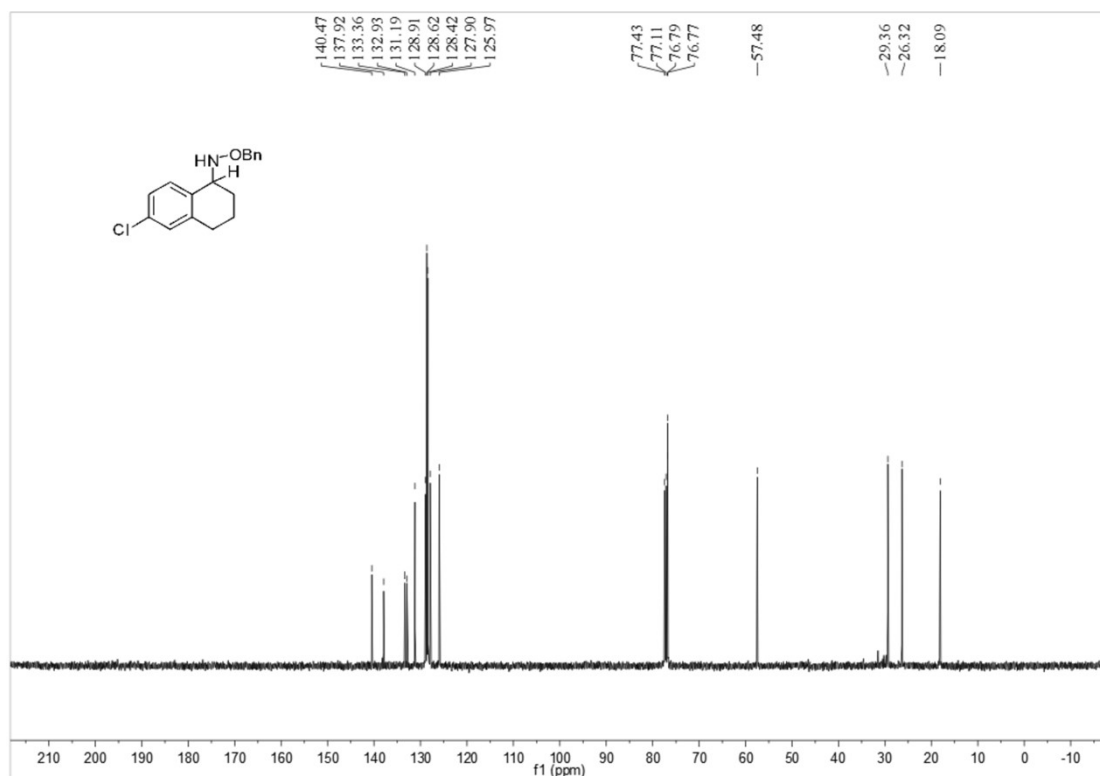



**<sup>1</sup>H NMR spectra of *O*-benzyl-*N*-(1-phenylbutyl)hydroxylamine (2x):**

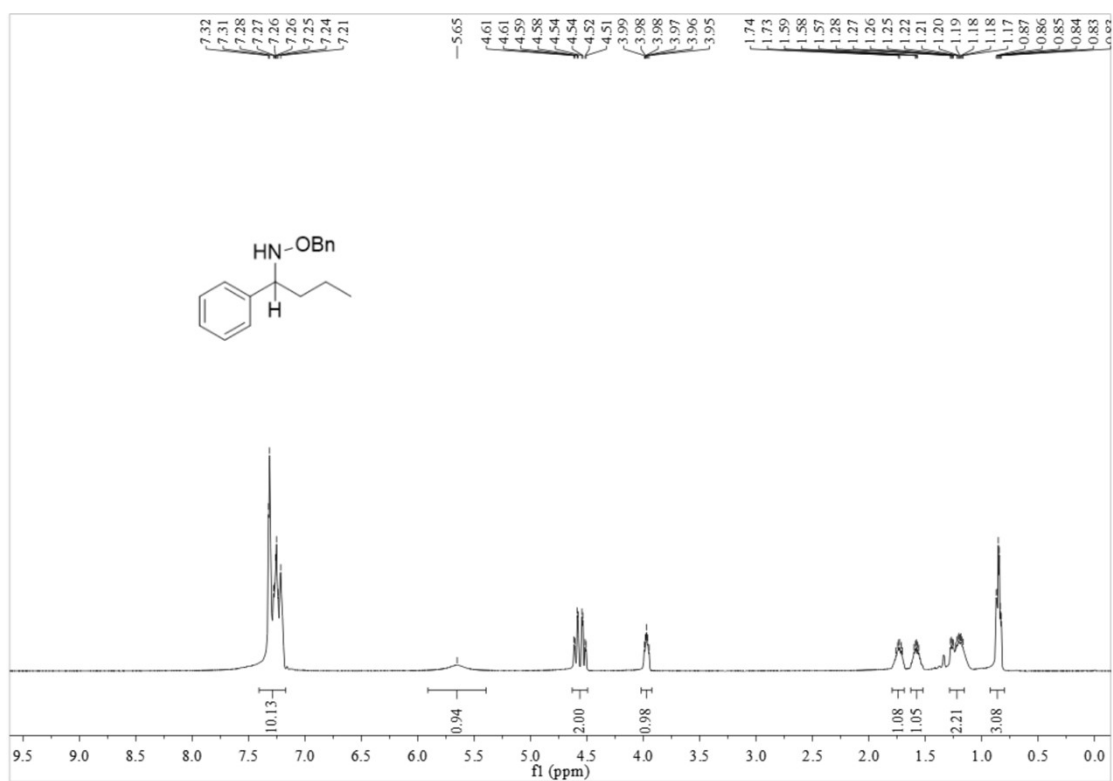

**<sup>13</sup>C NMR spectra of *O*-benzyl-*N*-(1-phenylbutyl)hydroxylamine (2x):**

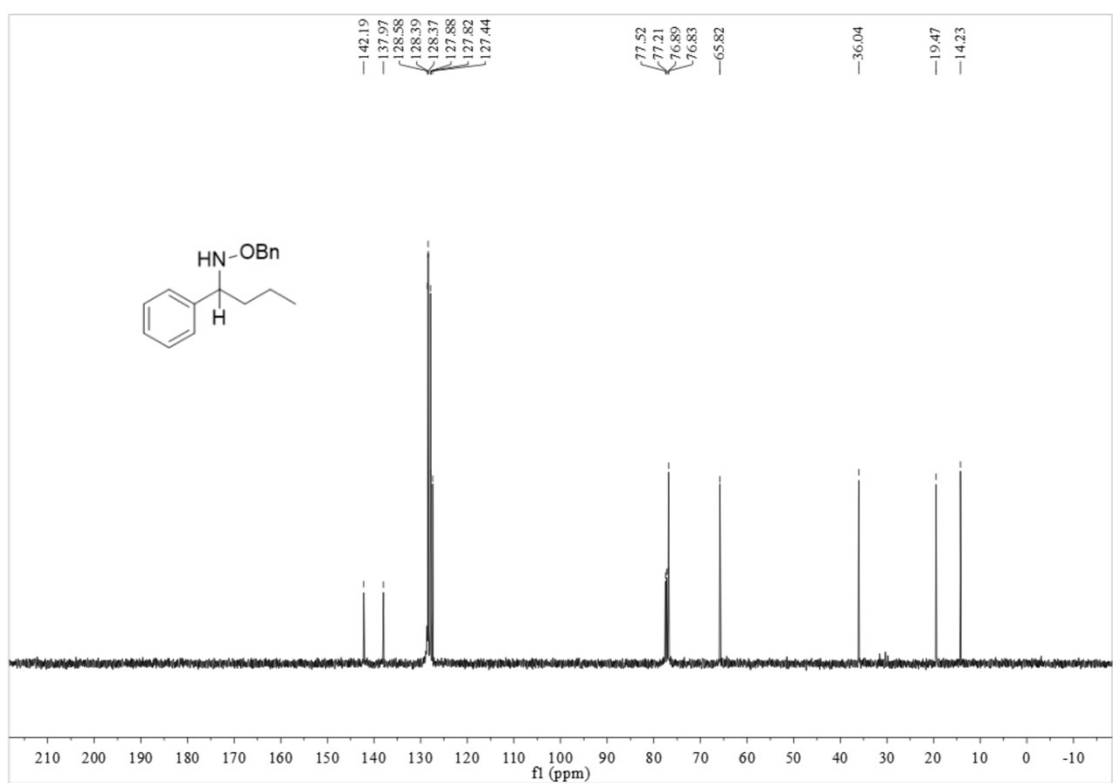

**<sup>1</sup>H NMR spectra of *O*-methyl-*N*-(phenyl(*p*-tolyl)methyl)hydroxylamine (2y)**

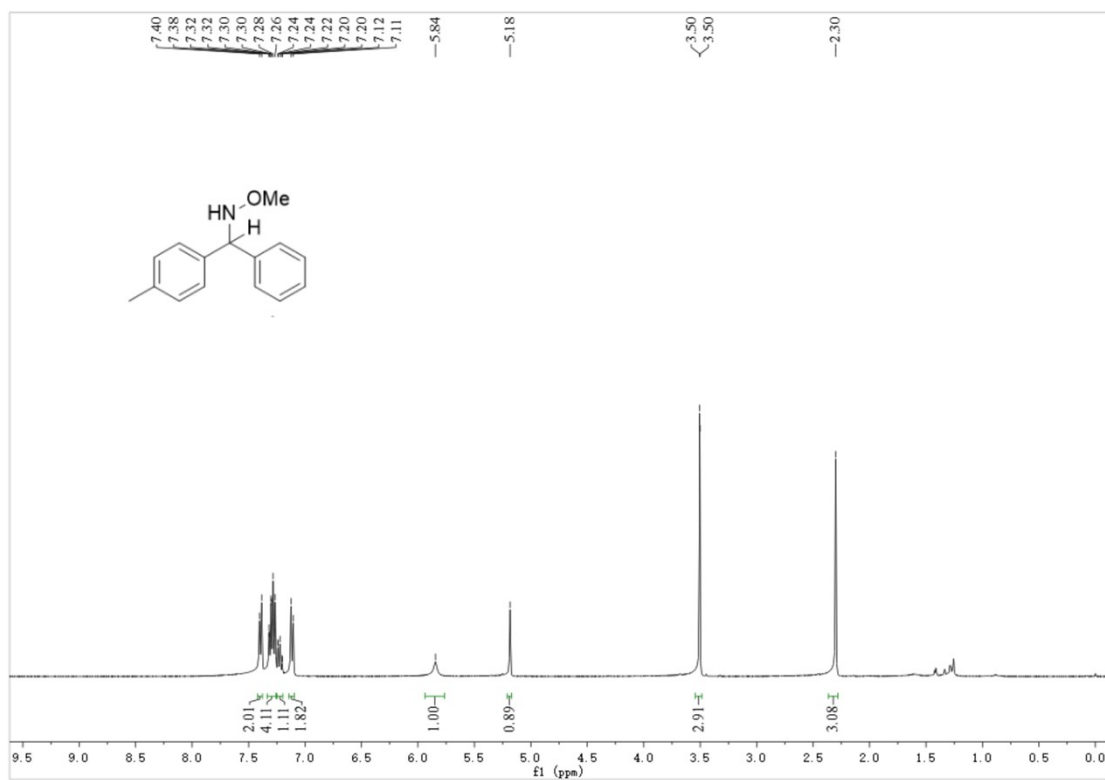

**<sup>13</sup>C NMR spectra of *O*-methyl-*N*-(phenyl(*p*-tolyl)methyl)hydroxylamine (2y)**

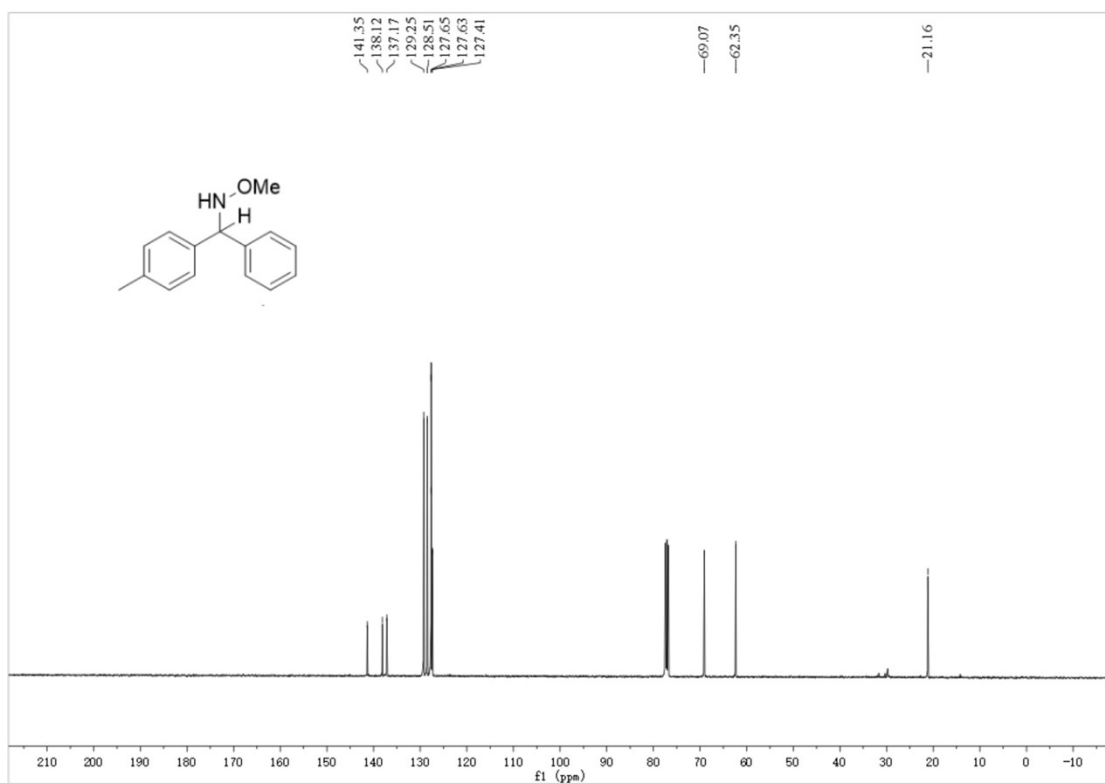

### <sup>1</sup>H NMR spectra of *N*-(1-phenylethyl)hydroxylamine (2ba)

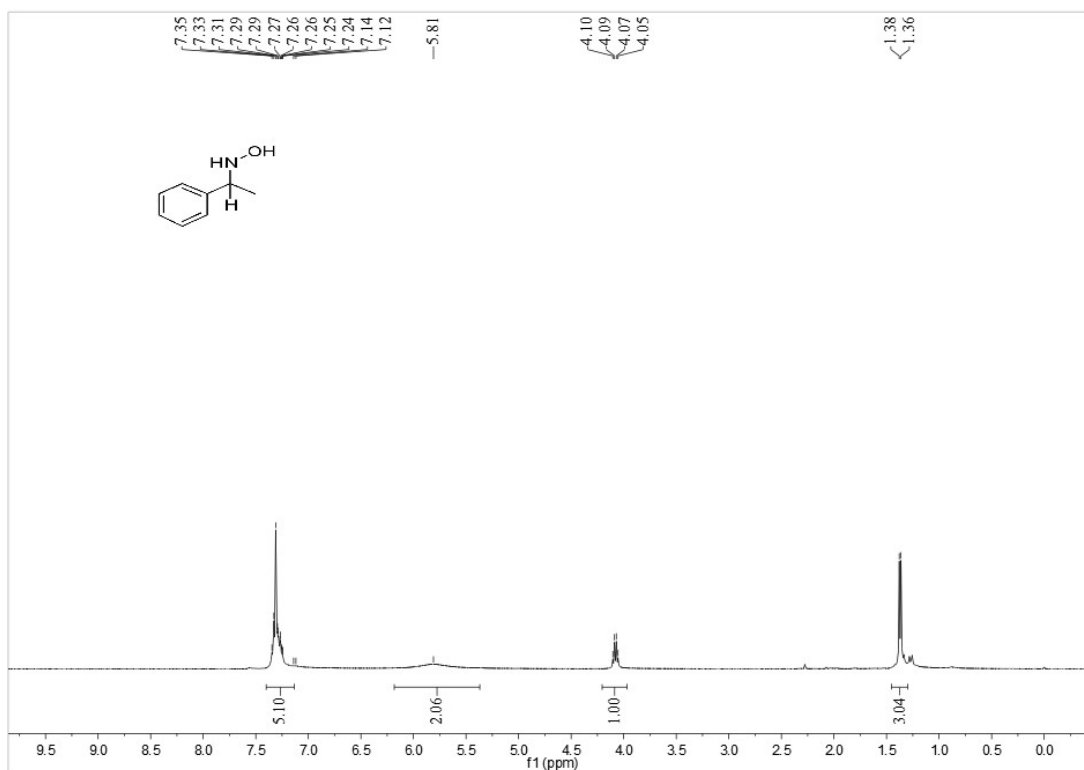

### <sup>13</sup>C NMR spectra of *N*-(1-phenylethyl)hydroxylamine (2ba)

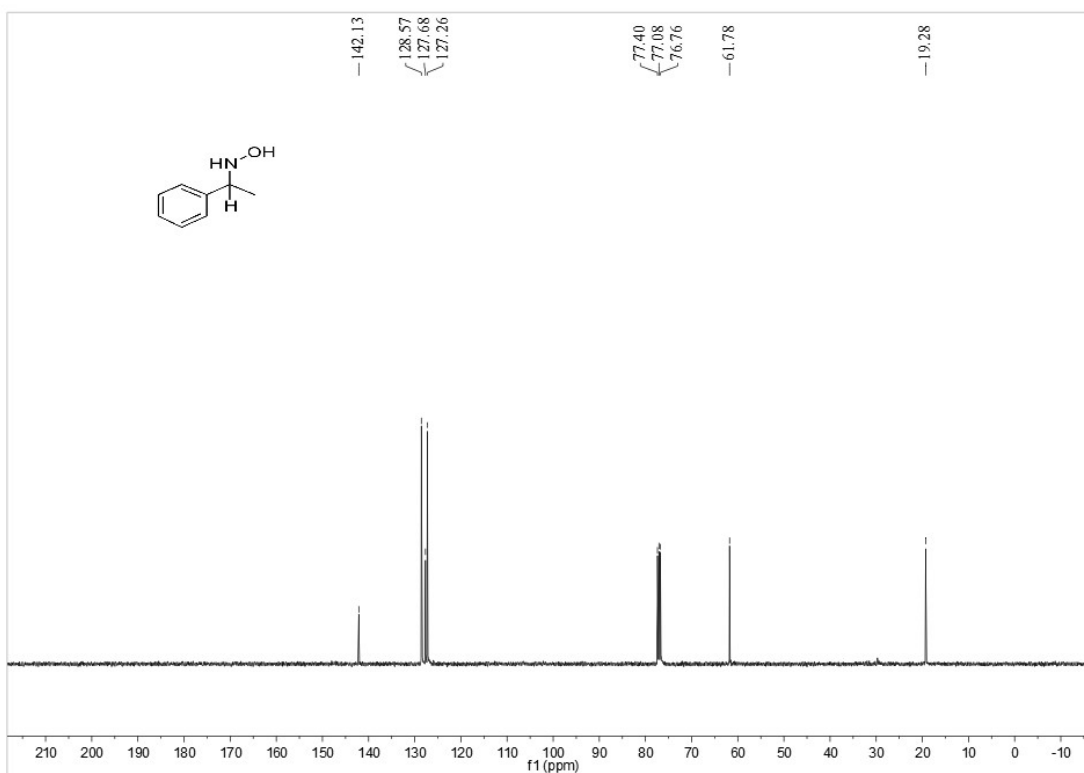

**<sup>1</sup>H NMR spectra of *N*-(1-(4-fluorophenyl)ethyl)hydroxylamine (2bb)**

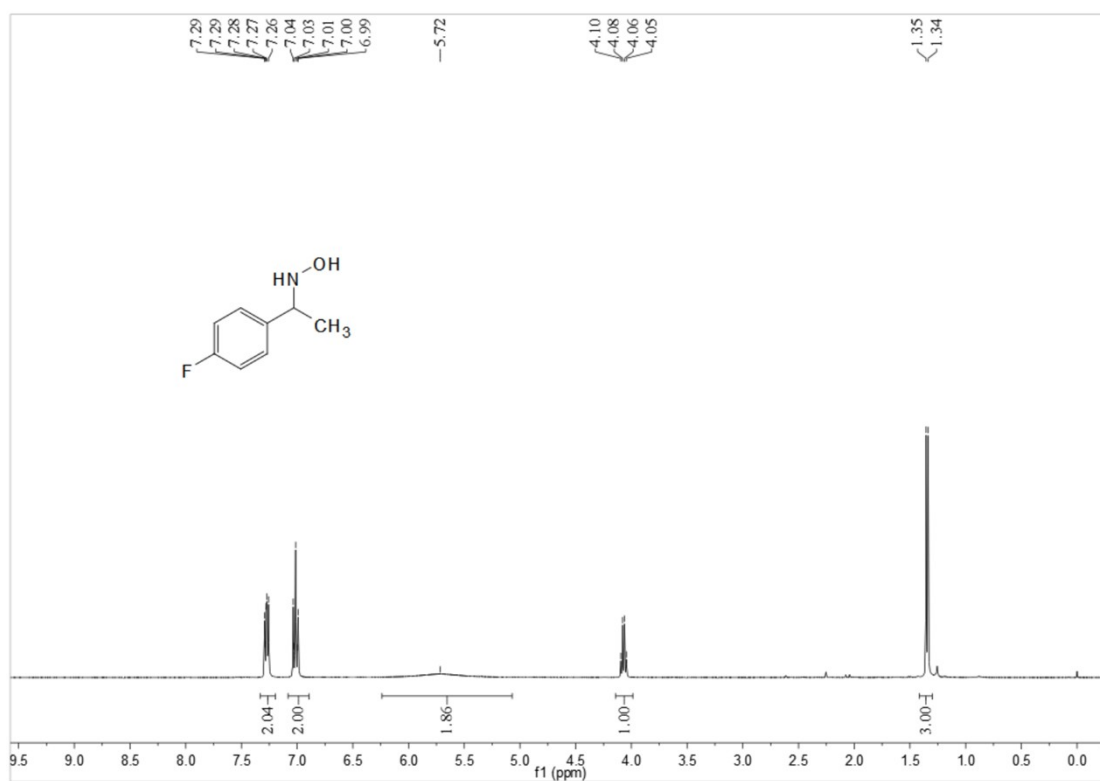

**<sup>13</sup>C NMR spectra of *N*-(1-(4-fluorophenyl)ethyl)hydroxylamine (2bb)**

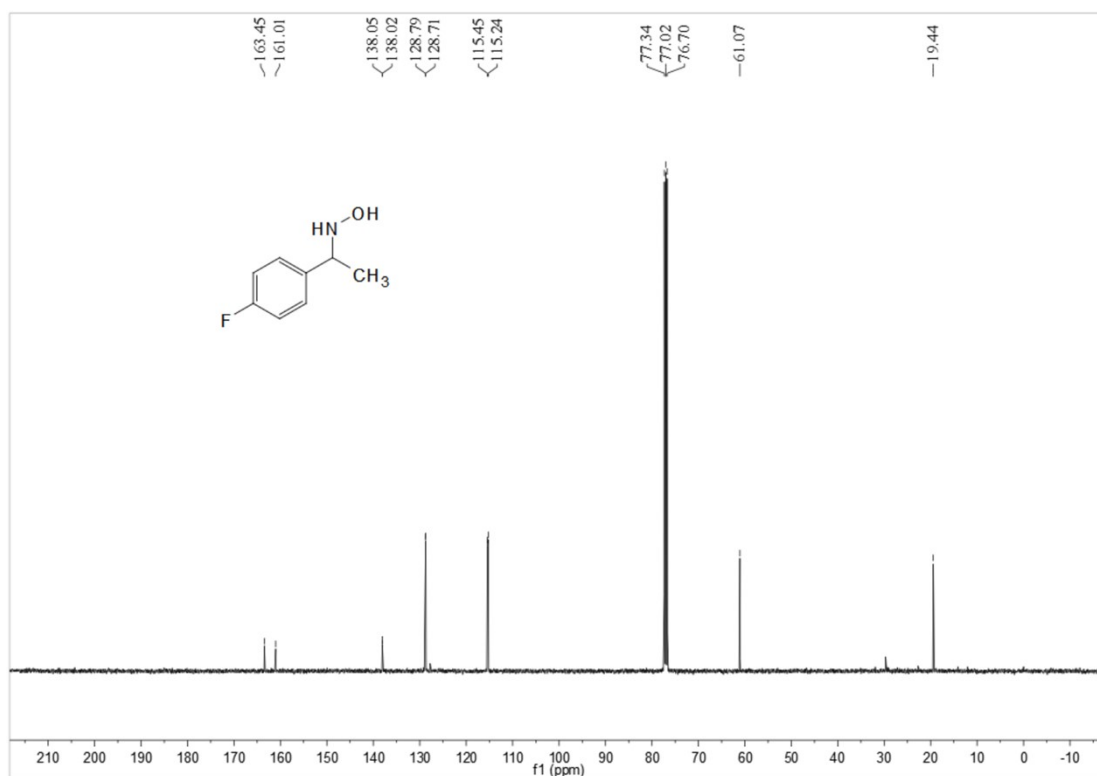

**<sup>1</sup>H NMR spectra of *N*-(1-(4-chlorophenyl)ethyl)hydroxylamine (2bc)**

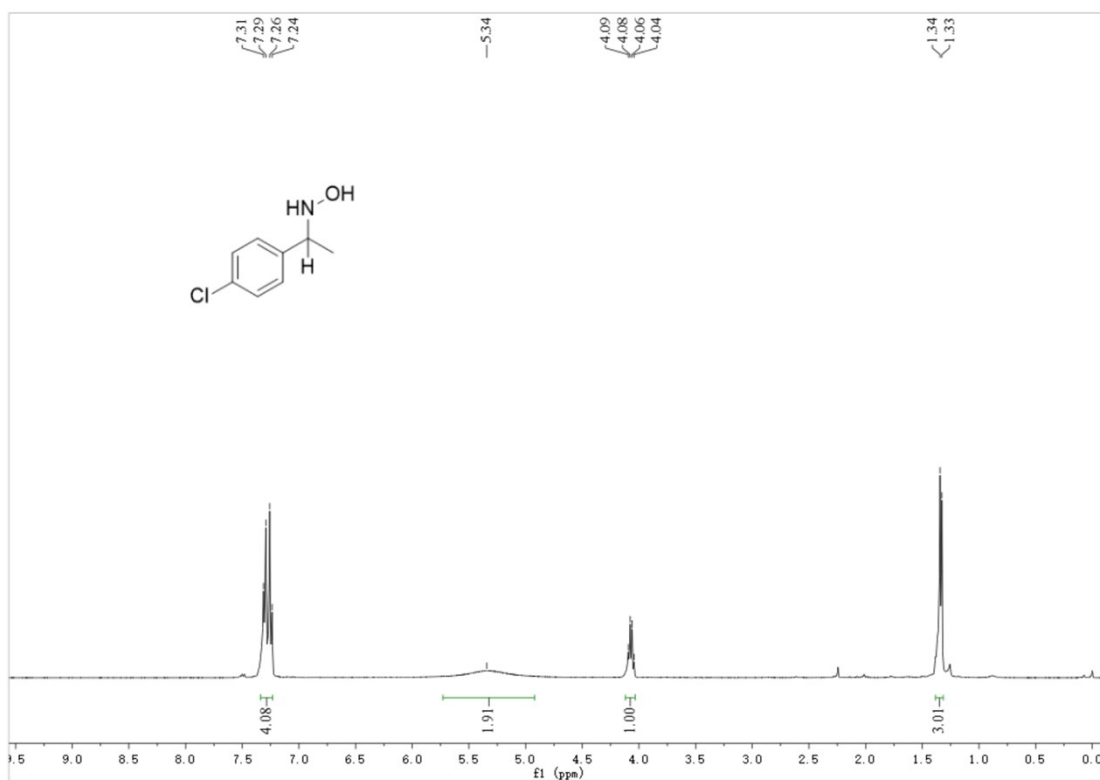

**<sup>13</sup>C NMR spectra of *N*-(1-(4-chlorophenyl)ethyl)hydroxylamine (2bc)**

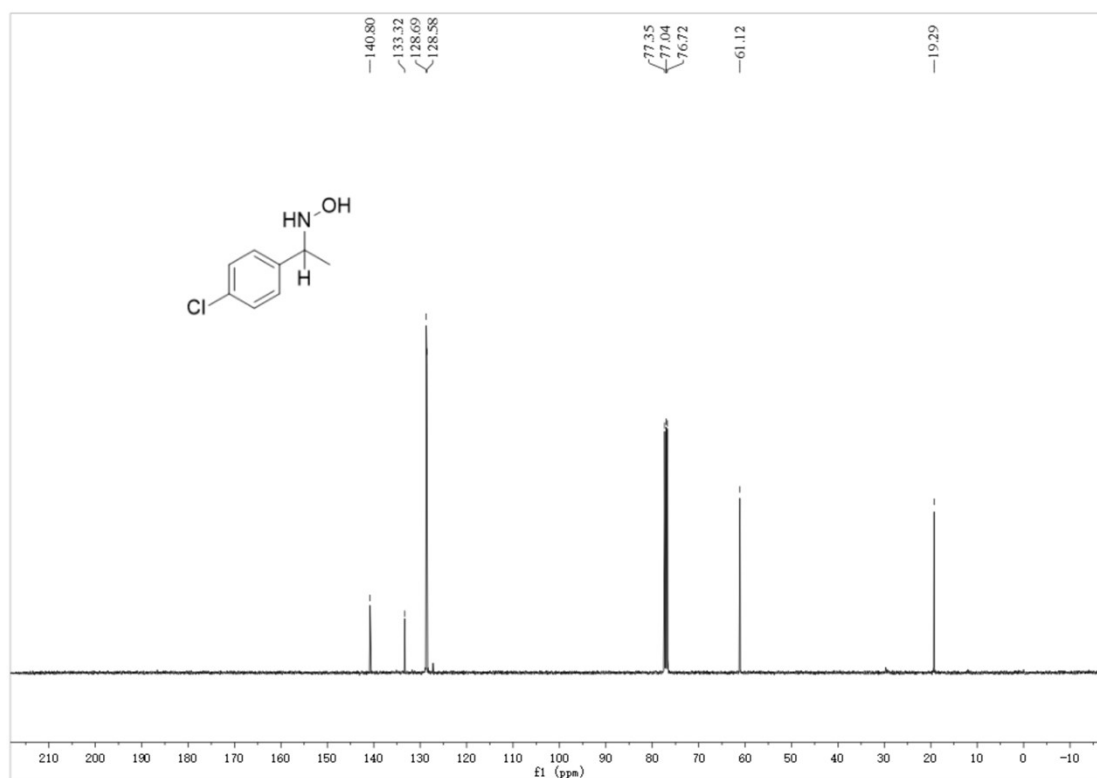

**<sup>1</sup>H NMR spectra of *N*-(1-(*p*-tolyl)ethyl)hydroxylamine (2bd)**

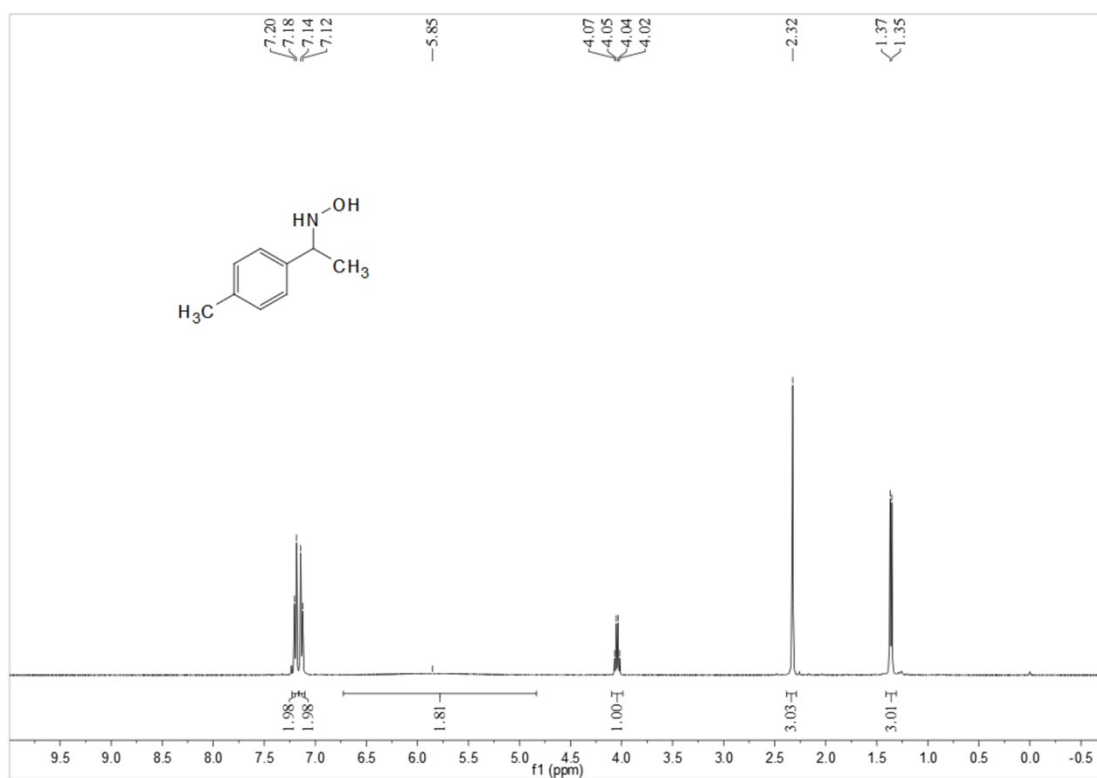

**<sup>13</sup>C NMR spectra of *N*-(1-(*p*-tolyl)ethyl)hydroxylamine (2bd)**

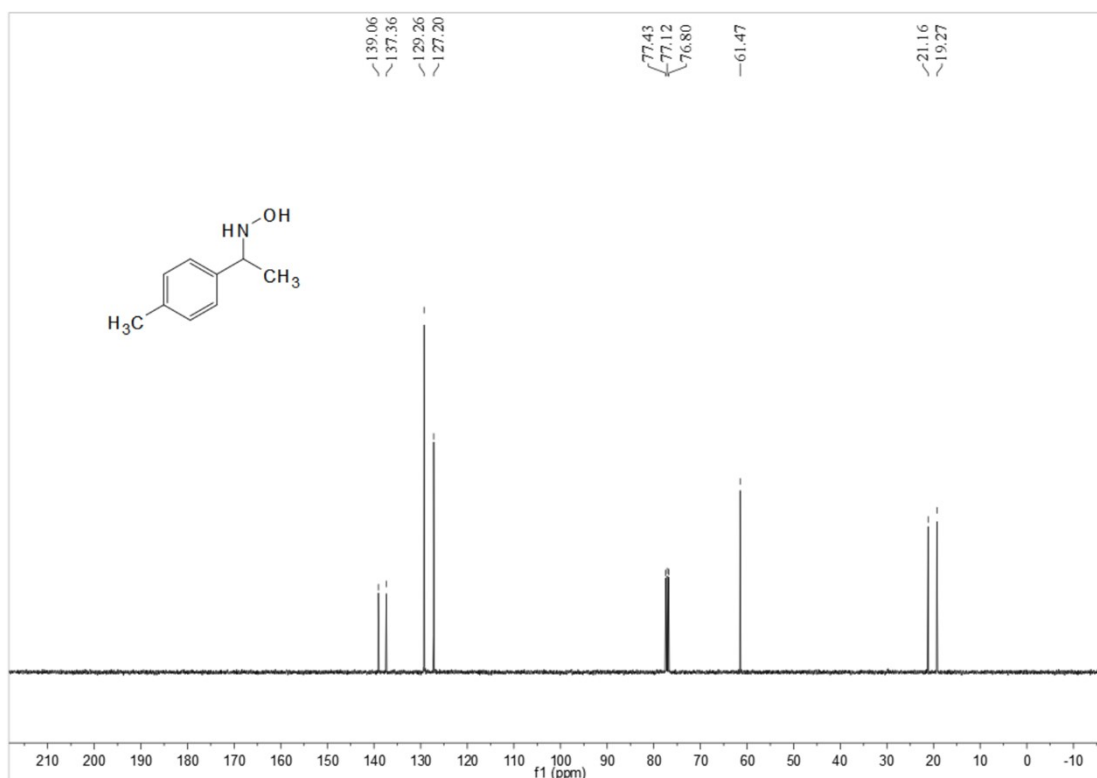

**<sup>1</sup>H NMR spectra of *N*-(1-(4-(tert-butyl)phenyl)ethyl)hydroxylamine (2be)**

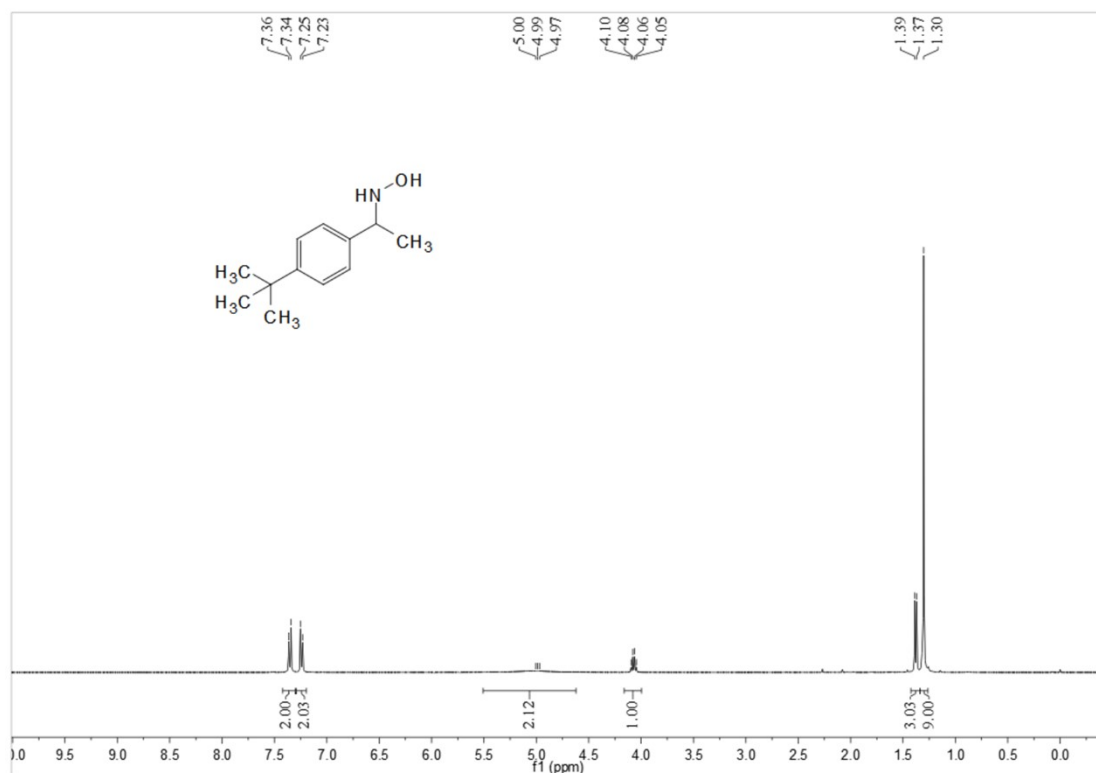

**<sup>13</sup>C NMR spectra of *N*-(1-(4-(tert-butyl)phenyl)ethyl)hydroxylamine (2be)**

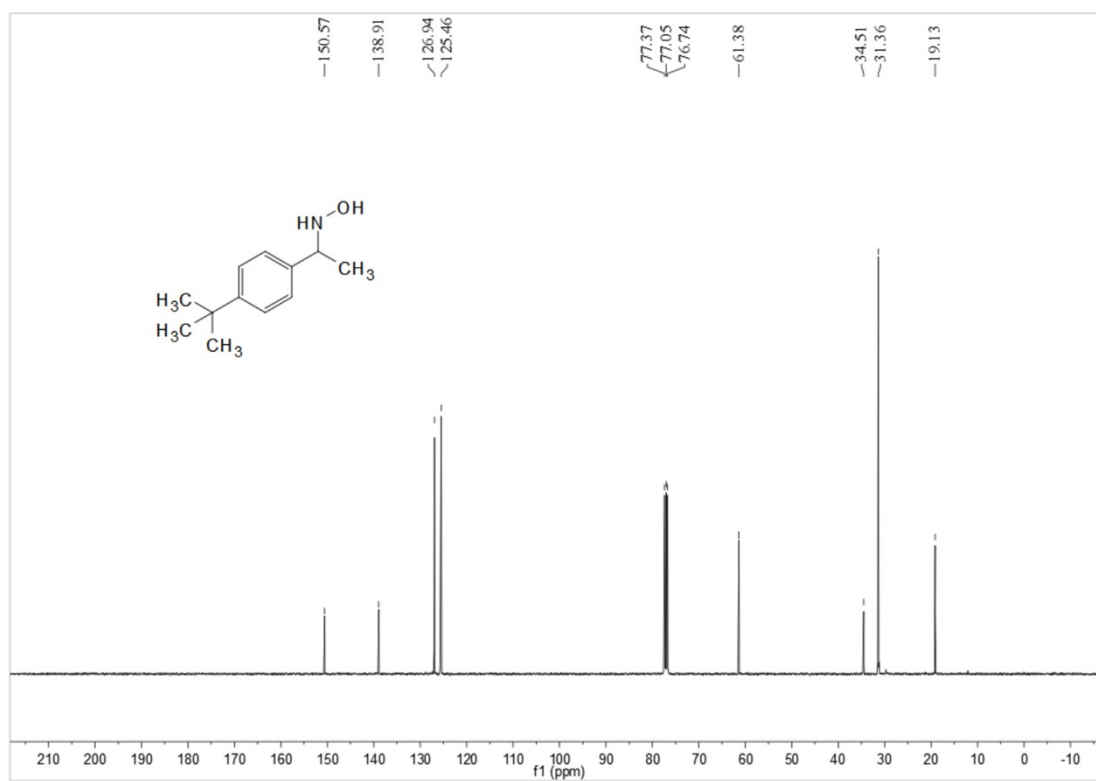

**<sup>1</sup>H NMR spectra of *N*-(1-(naphthalen-2-yl)ethyl)hydroxylamine (2bf)**

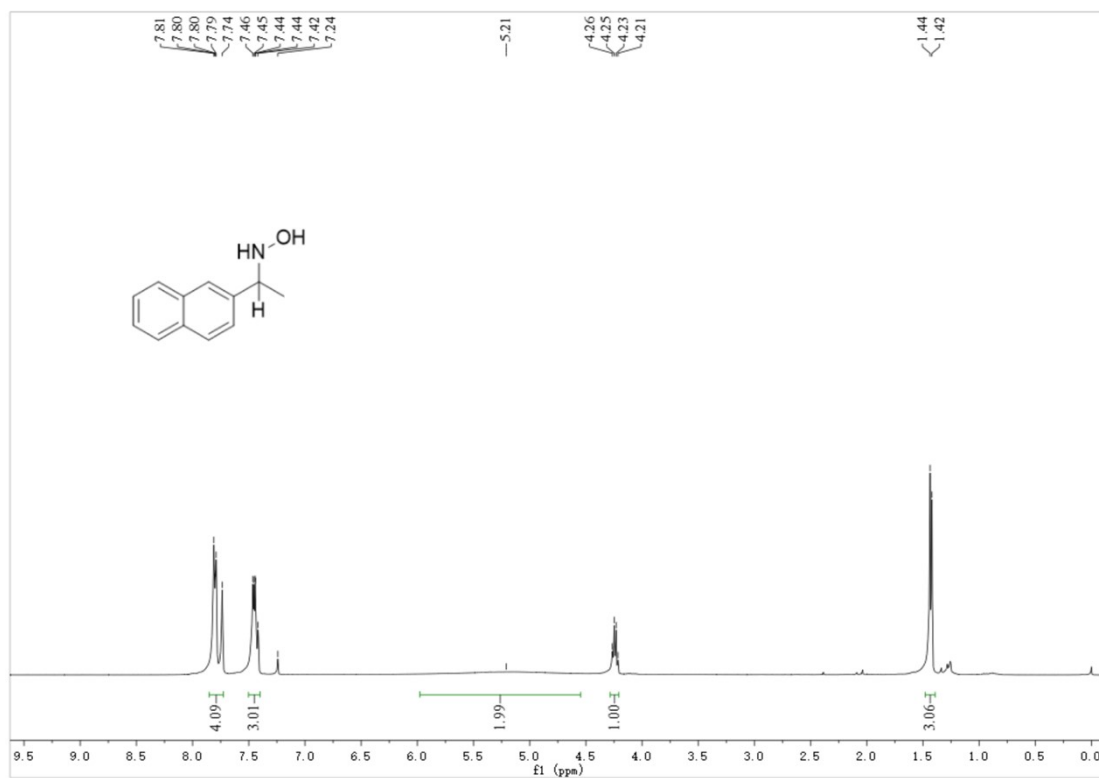

**<sup>13</sup>C NMR spectra of *N*-(1-(naphthalen-2-yl)ethyl)hydroxylamine (2bf)**

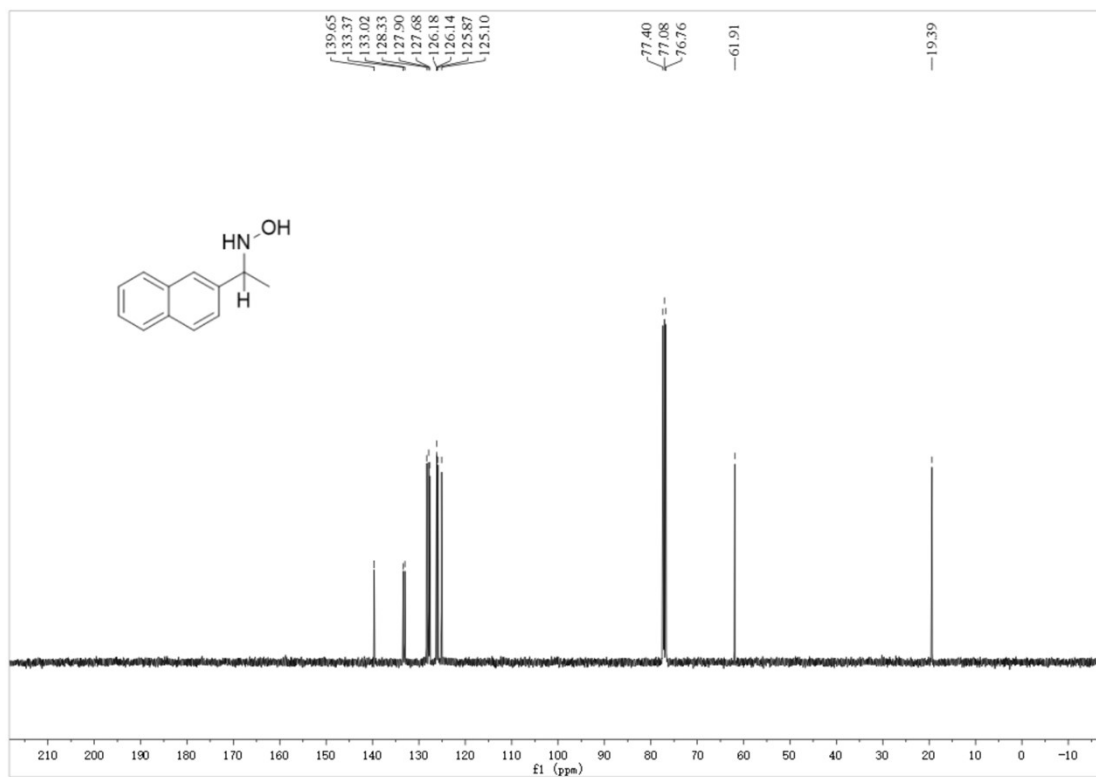



**<sup>1</sup>H NMR spectra of *N*-(1-(furan-2-yl)ethyl)hydroxylamine (2bg)**

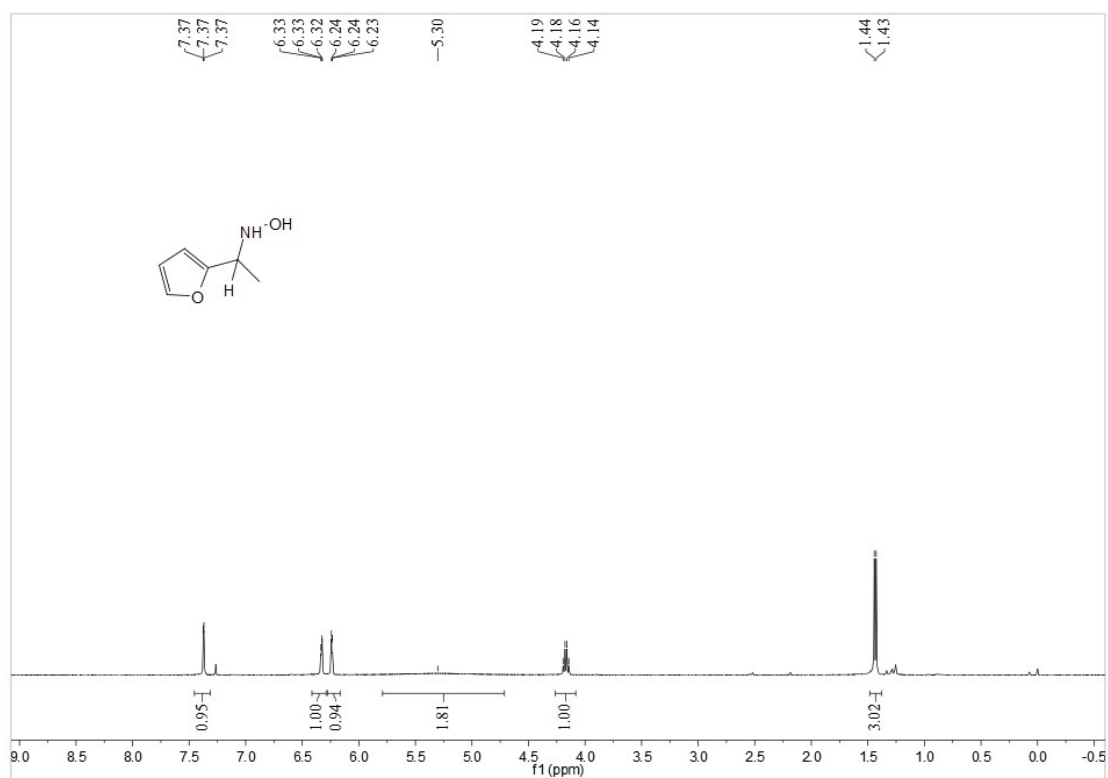

**<sup>13</sup>C NMR spectra of *N*-(1-(furan-2-yl)ethyl)hydroxylamine (2bg)**

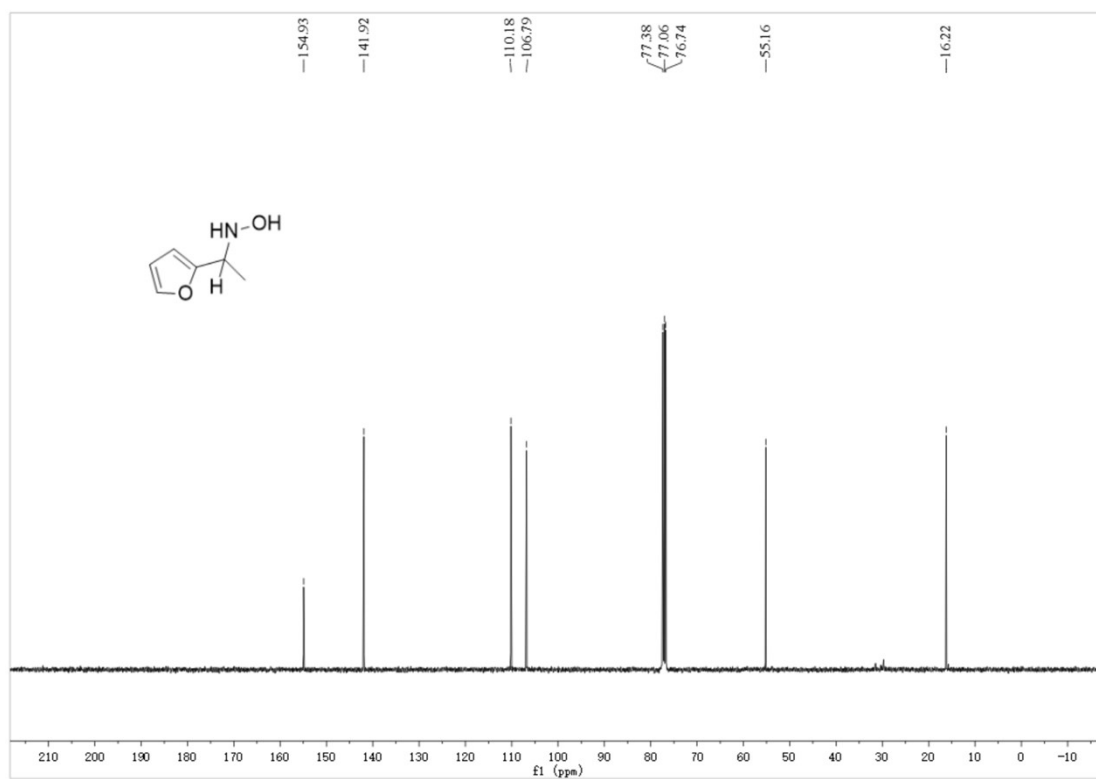

### <sup>1</sup>H NMR spectra of *N,O*-dibenzylhydroxylamine (2bh)

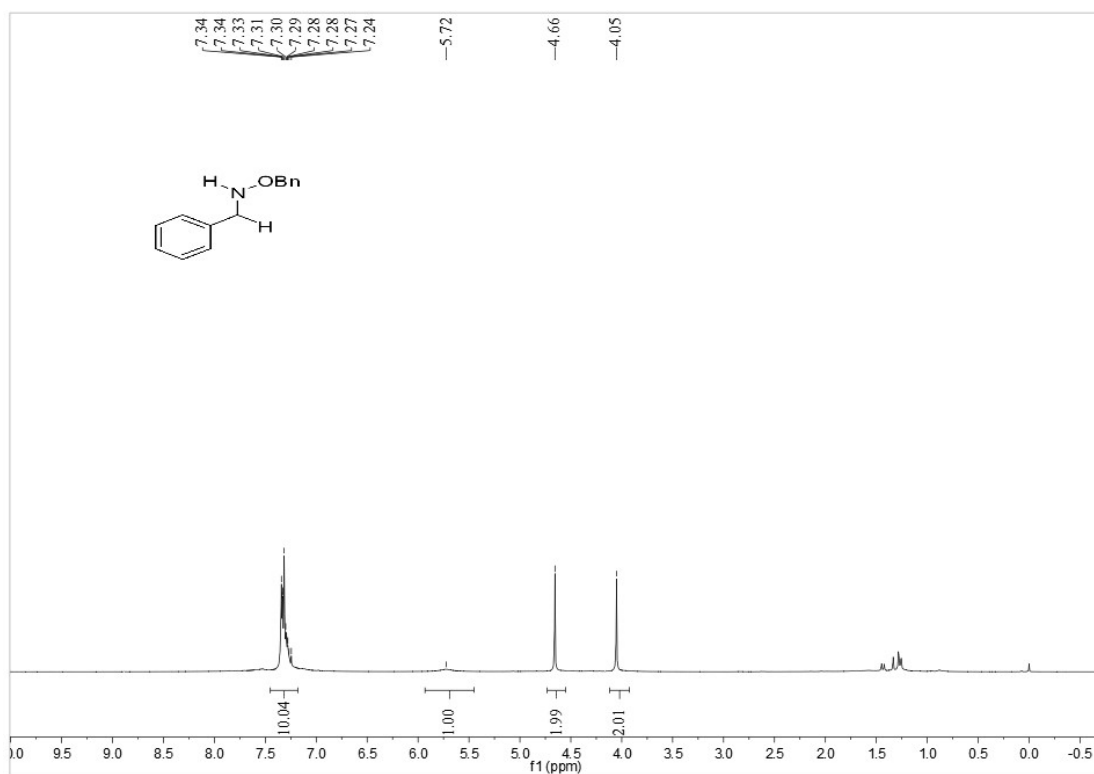

### <sup>13</sup>C NMR spectra of *N,O*-dibenzylhydroxylamine (2bh)

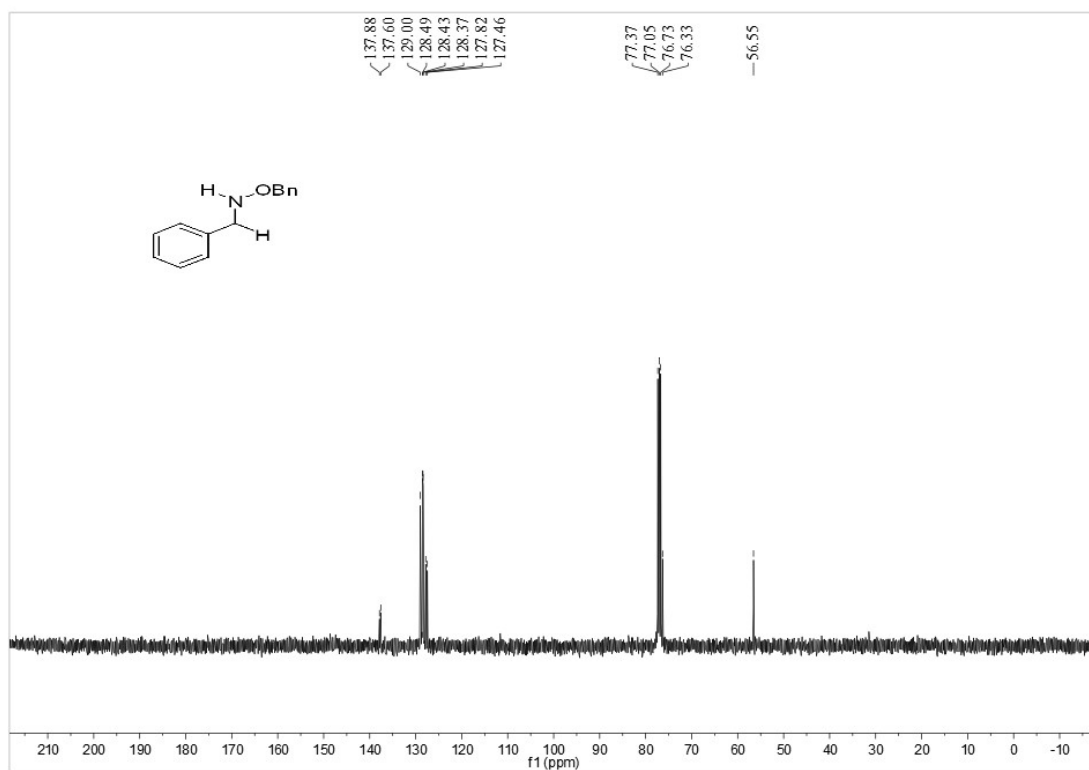

**<sup>1</sup>H NMR spectra of *O*-benzyl-*N*-(4-fluorobenzyl)hydroxylamine (2bi)**

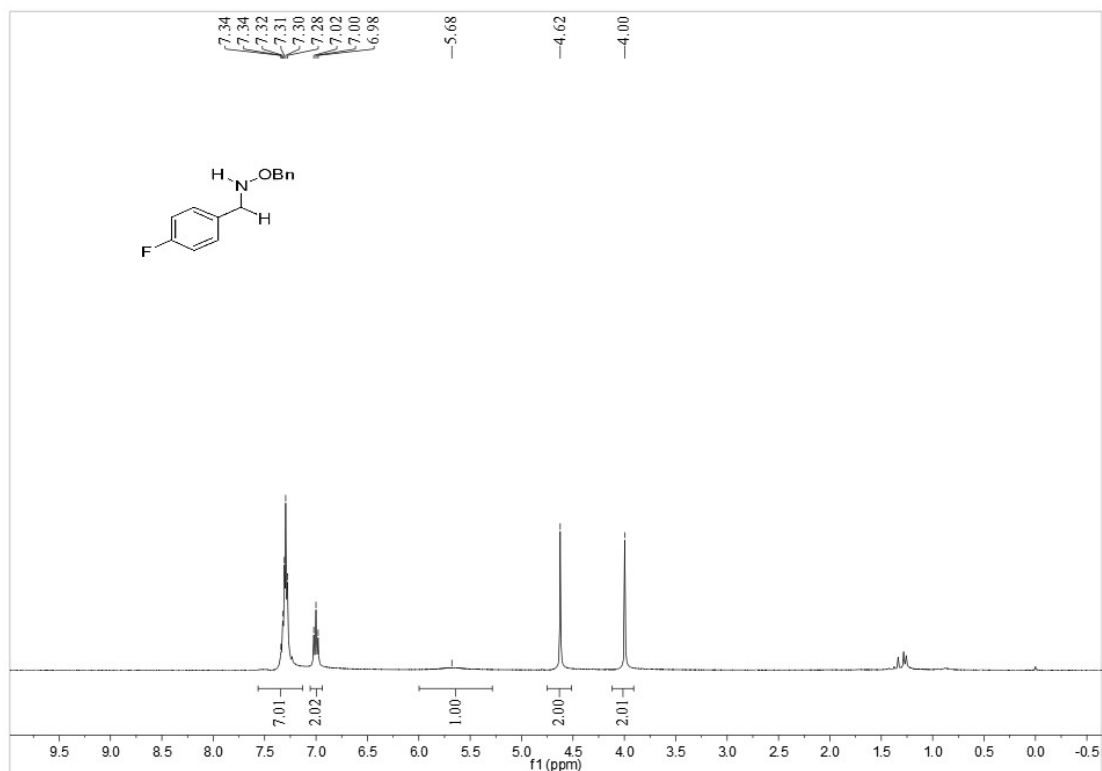

**<sup>13</sup>C NMR spectra of *O*-benzyl-*N*-(4-fluorobenzyl)hydroxylamine (2bi)**

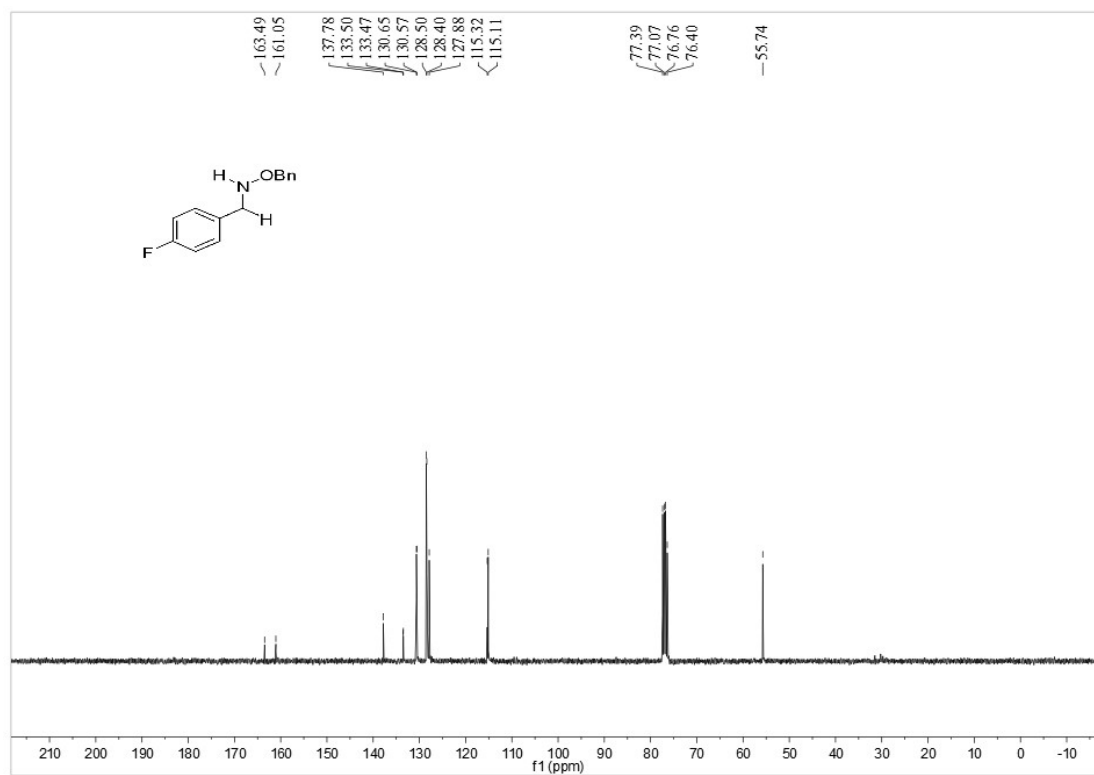

**<sup>1</sup>H NMR spectra of *O*-benzyl-*N*-(4-methylbenzyl)hydroxylamine (2bj)**

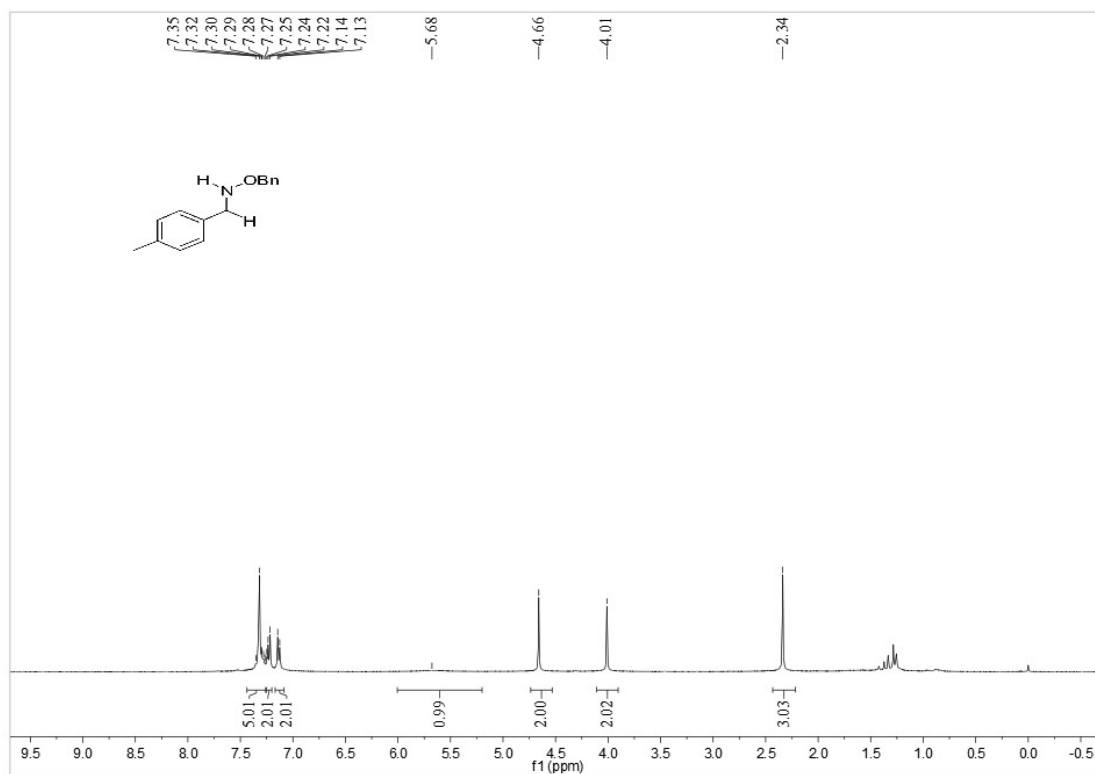

**<sup>13</sup>C NMR spectra of *O*-benzyl-*N*-(4-methylbenzyl)hydroxylamine (2bj)**

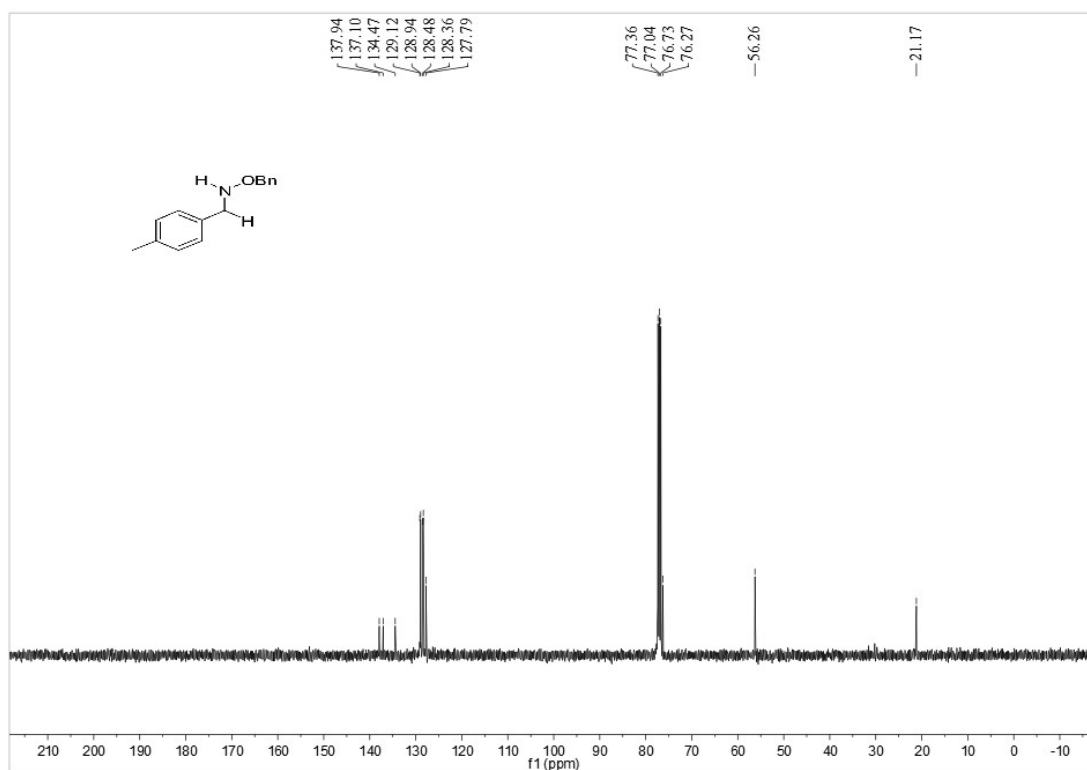

**<sup>1</sup>H NMR spectra of *O*-benzyl-*N*-(naphthalen-2-ylmethyl)hydroxylamine (2bk)**

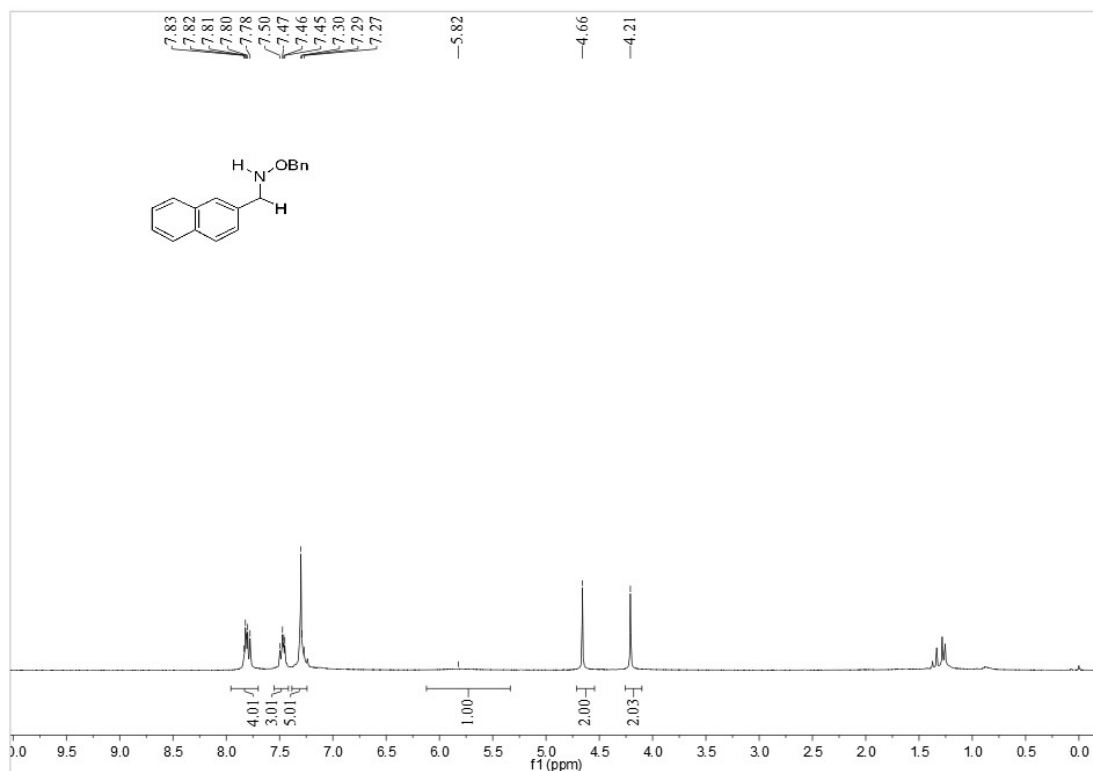

**<sup>13</sup>C NMR spectra of *O*-benzyl-*N*-(naphthalen-2-ylmethyl)hydroxylamine (2bk)**

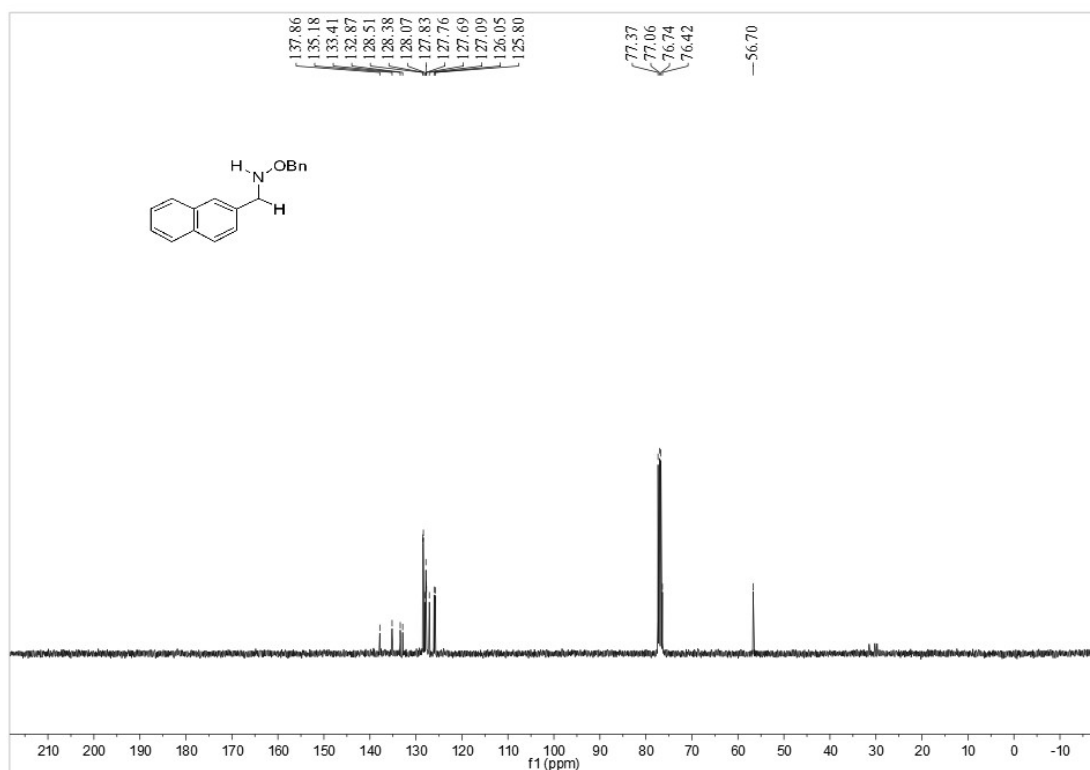

**<sup>1</sup>H NMR spectra of *O*-benzyl-*N*-(furan-2-ylmethyl)hydroxylamine (2bl)**

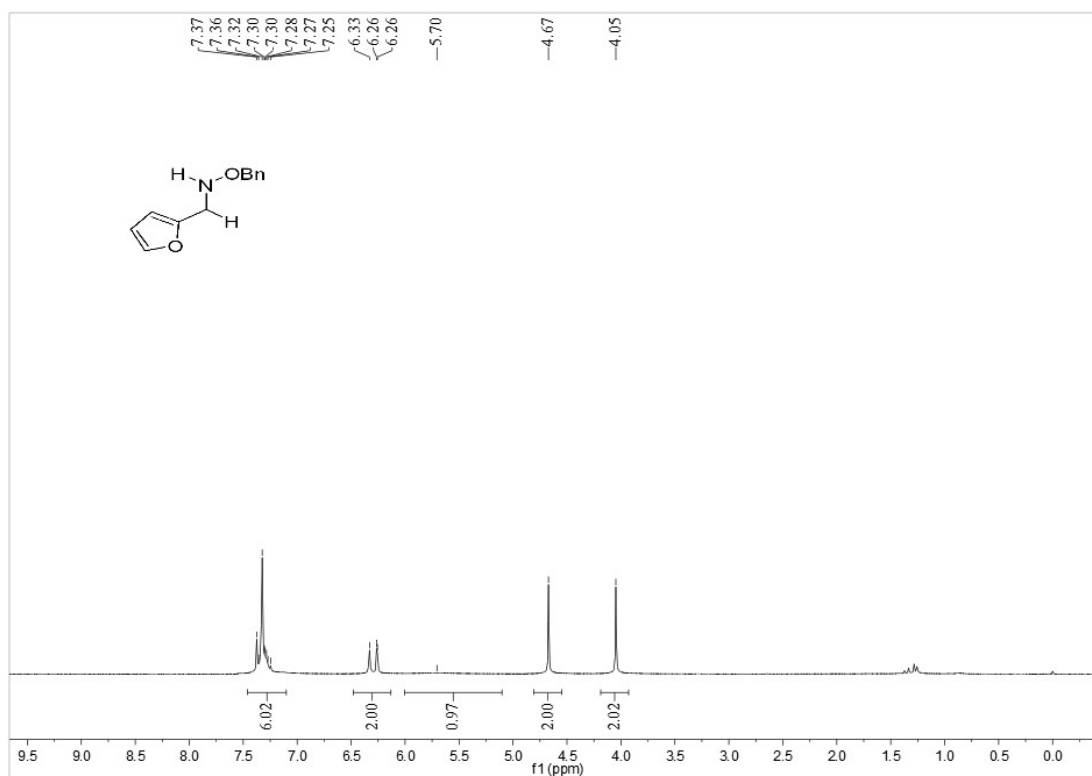

**<sup>13</sup>C NMR spectra of *O*-benzyl-*N*-(furan-2-ylmethyl)hydroxylamine (2bl)**

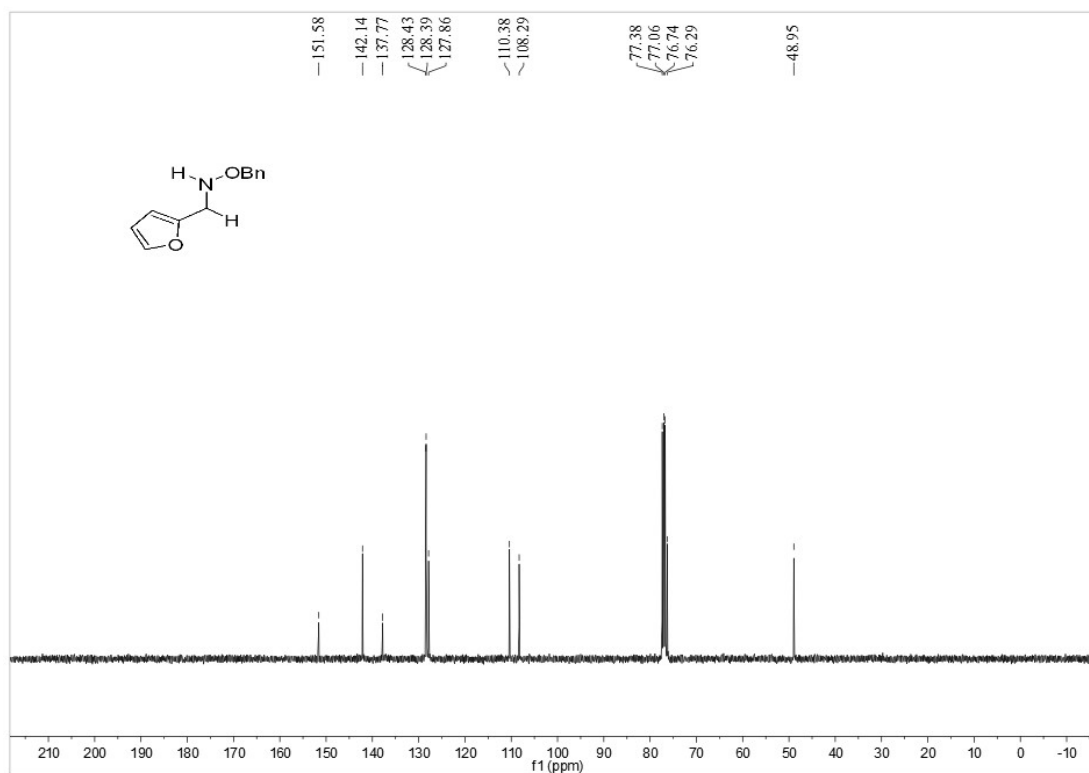

<sup>1</sup>H NMR spectra of *O*-benzyl-*N*-isopropylhydroxylamine (2aa)

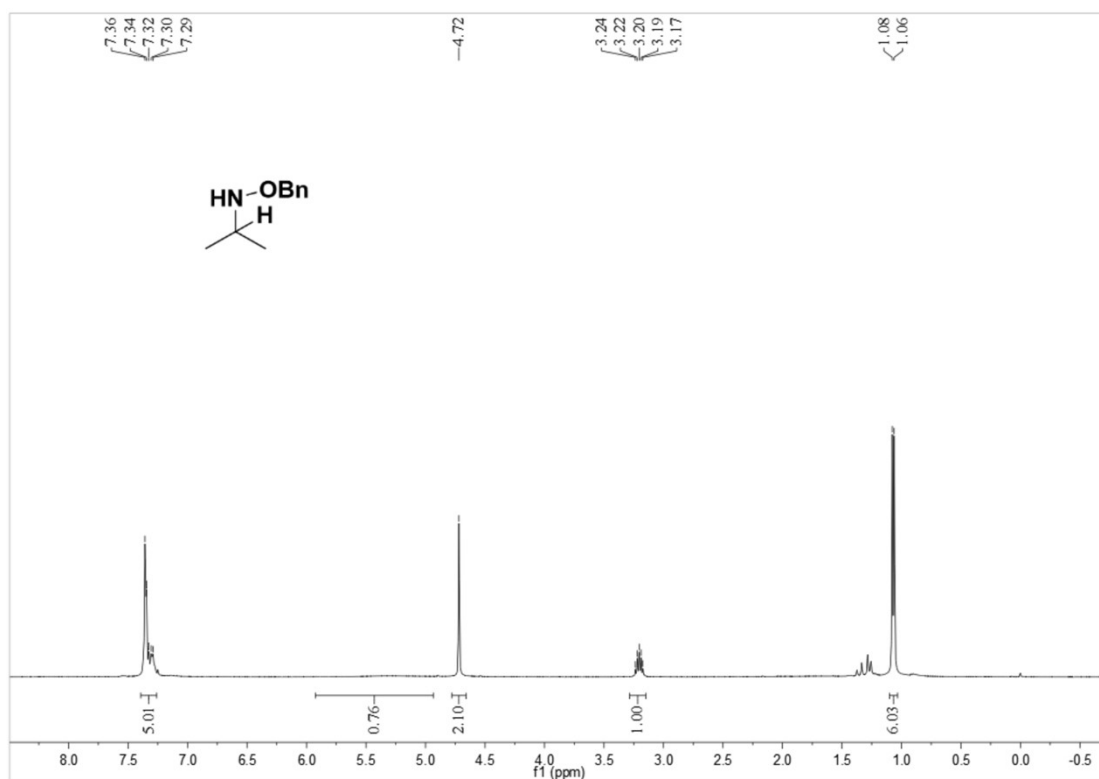

<sup>13</sup>C NMR spectra of *O*-benzyl-*N*-isopropylhydroxylamine (2aa)

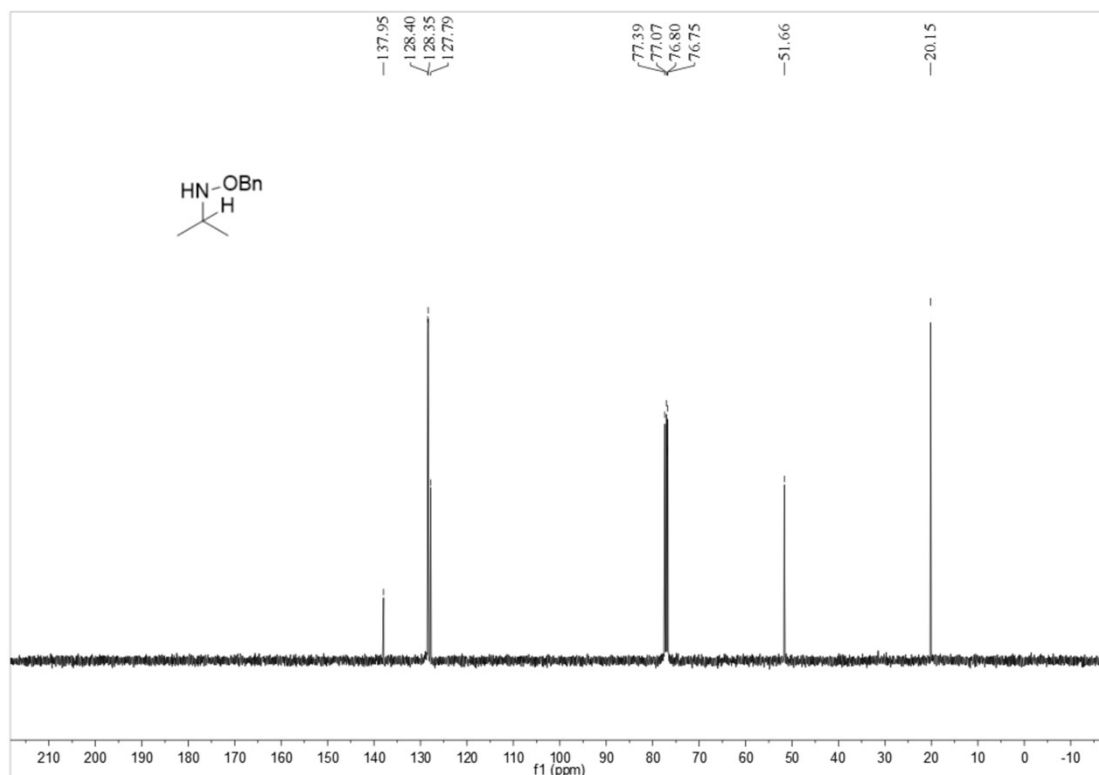

**<sup>1</sup>H NMR spectra of *O*-benzyl-*N*-(3,3-dimethylbutan-2-yl)hydroxylamine (2ab)**

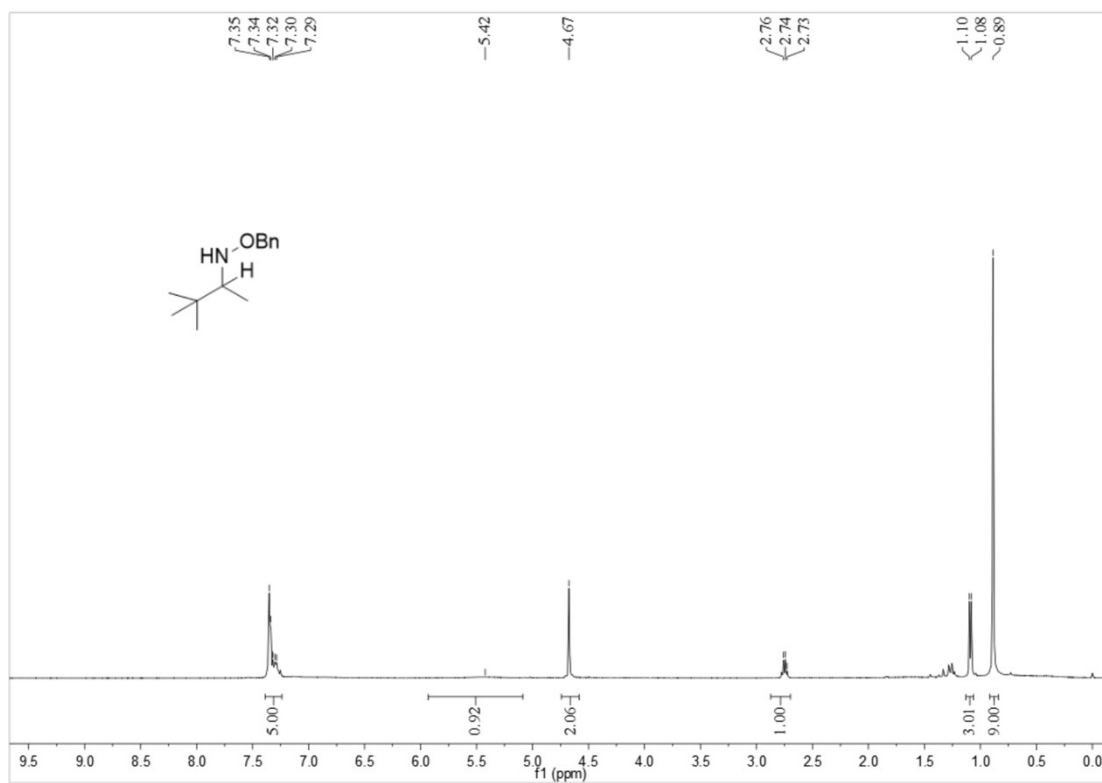

**<sup>13</sup>C NMR spectra of *O*-benzyl-*N*-(3,3-dimethylbutan-2-yl)hydroxylamine (2ab)**

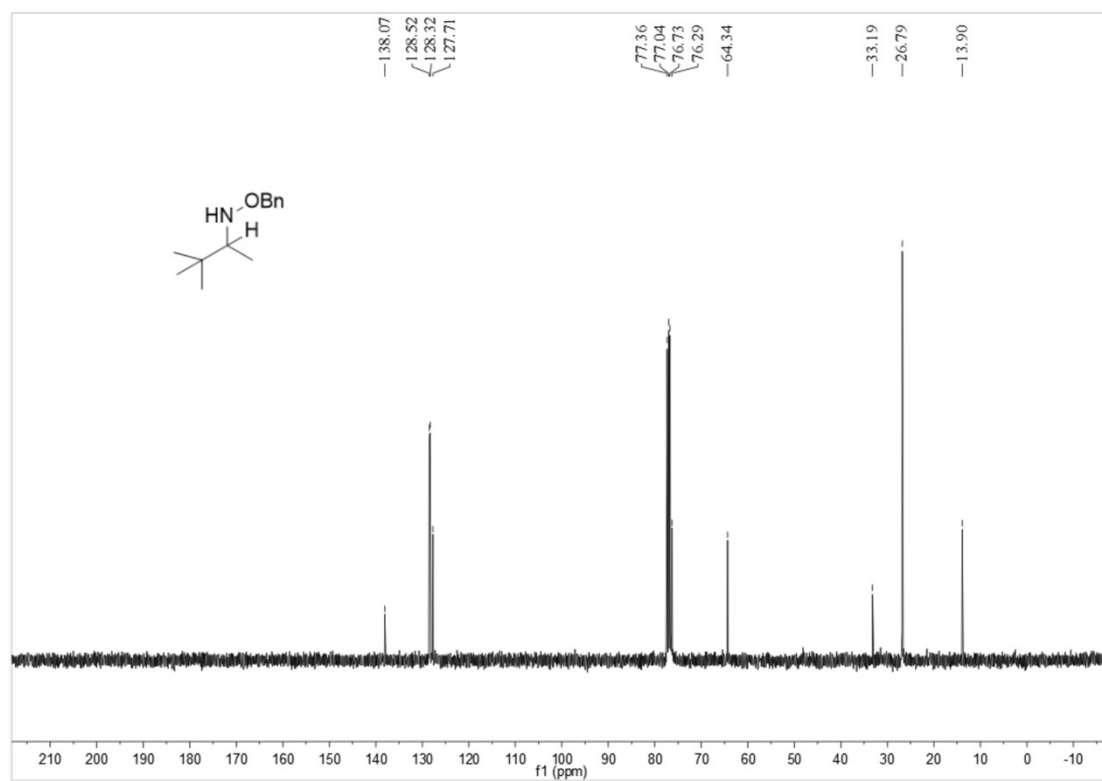



**<sup>1</sup>H NMR spectra of *O*-benzyl-*N*-(pentan-3-yl)hydroxylamine (2ac):**

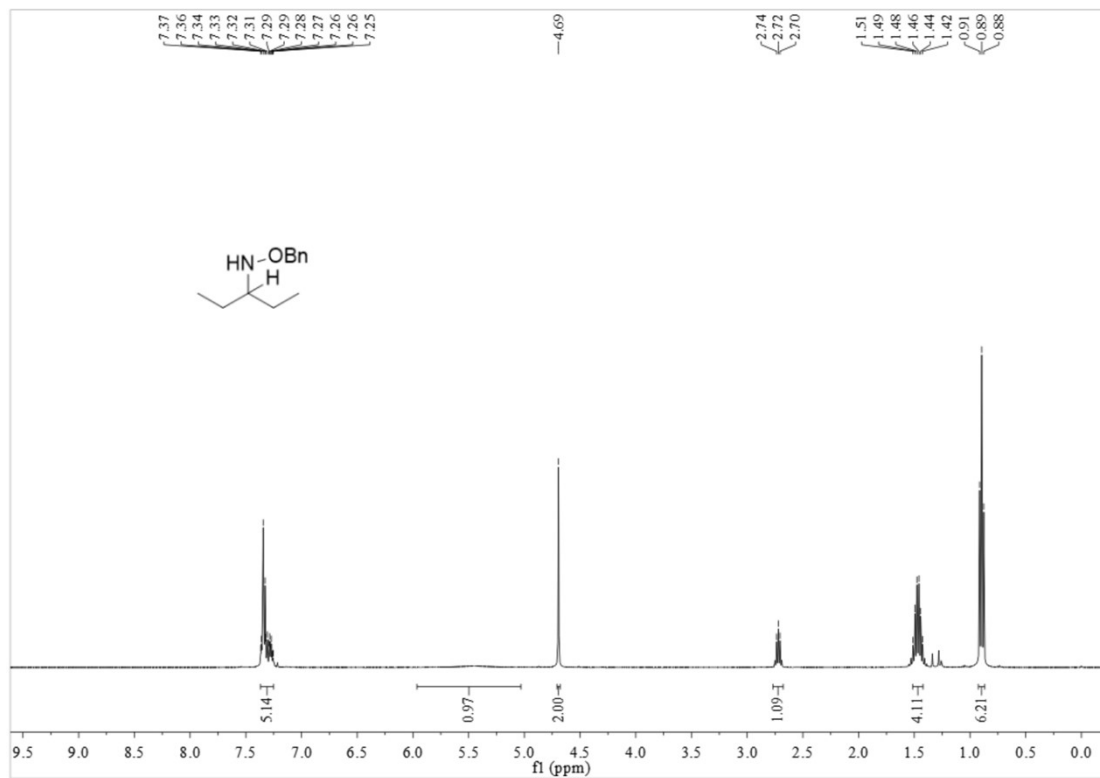

**<sup>13</sup>C NMR spectra of *O*-benzyl-*N*-(pentan-3-yl)hydroxylamine (2ac):**

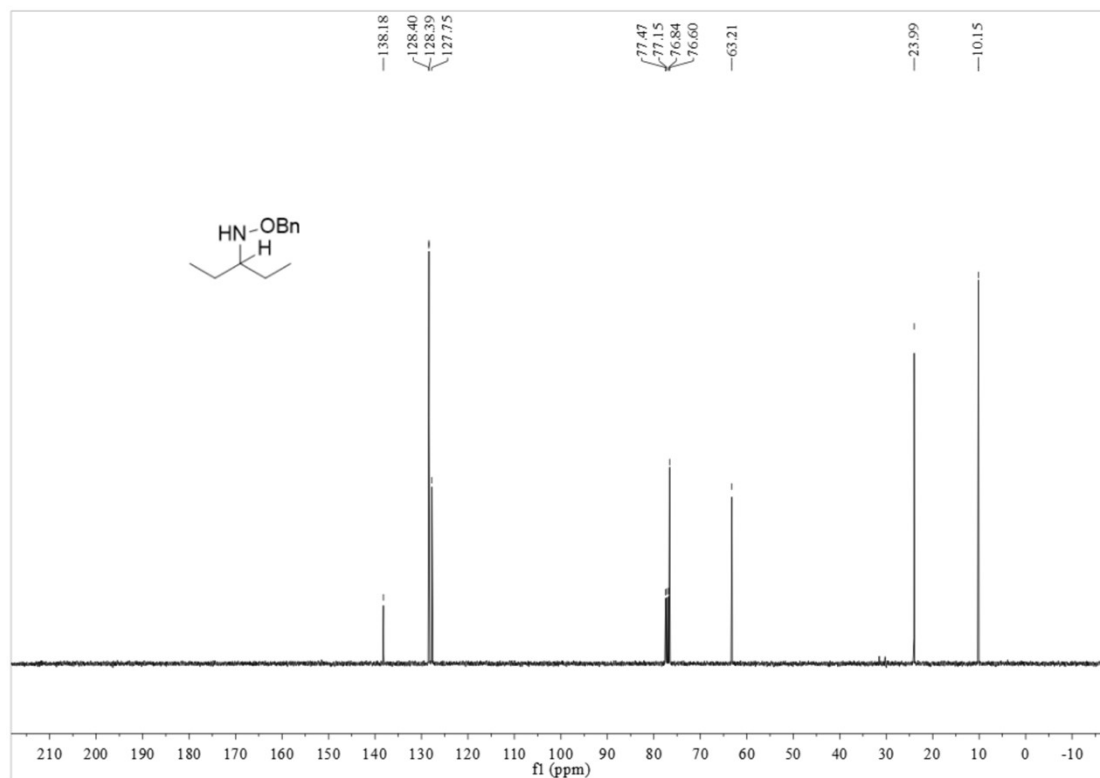

**<sup>1</sup>H NMR spectra of *O*-benzyl-*N*-(pentan-2-yl)hydroxylamine (2ad):**

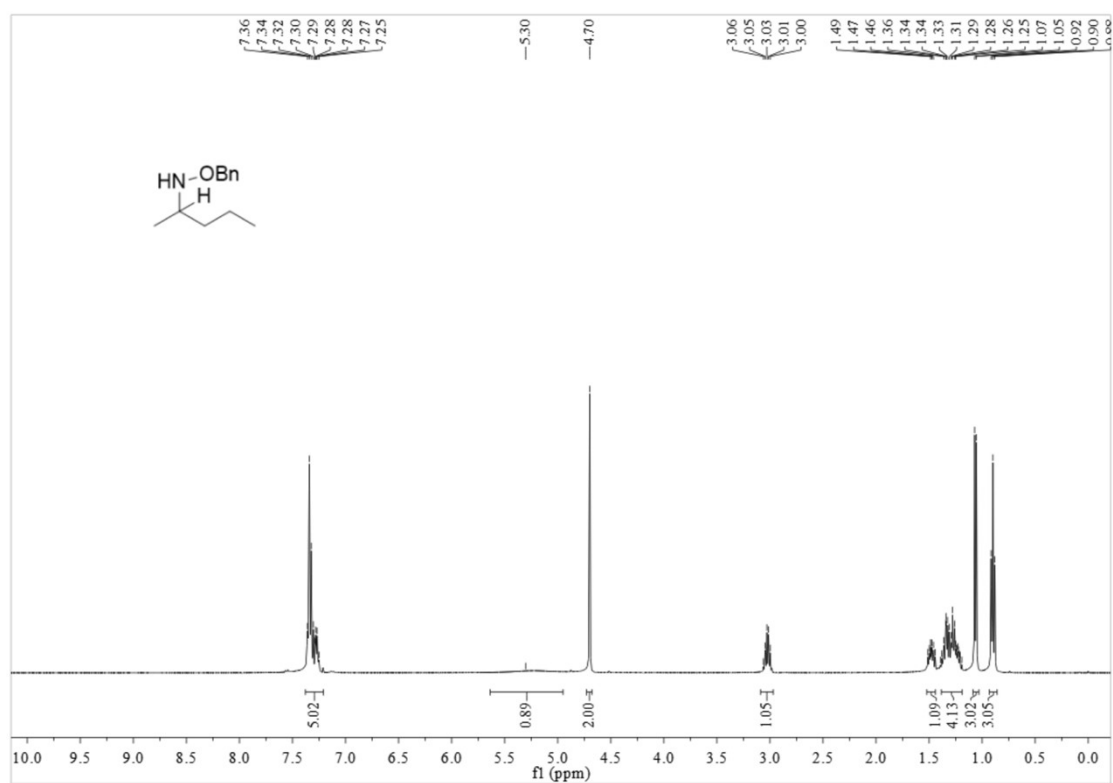

**<sup>13</sup>C NMR spectra of *O*-benzyl-*N*-(pentan-2-yl)hydroxylamine (2ad):**

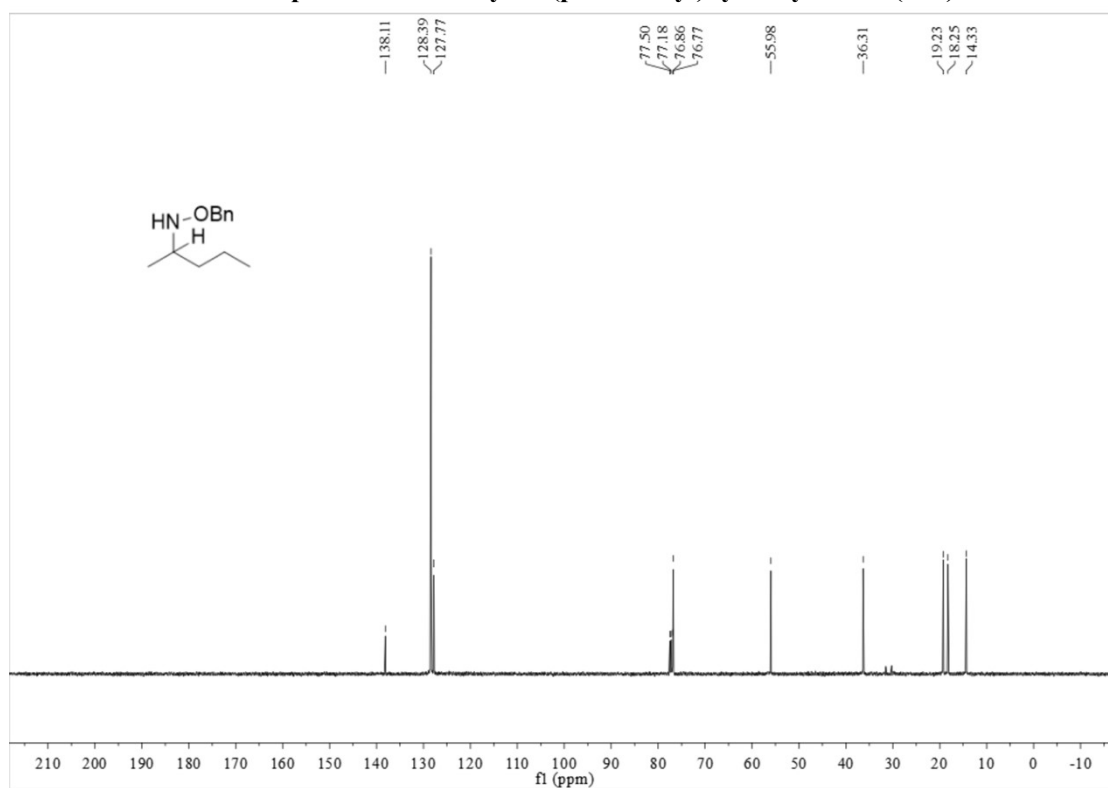

**<sup>1</sup>H NMR spectra of *O*-benzyl-*N*-cyclohexylhydroxylamine (2af)**

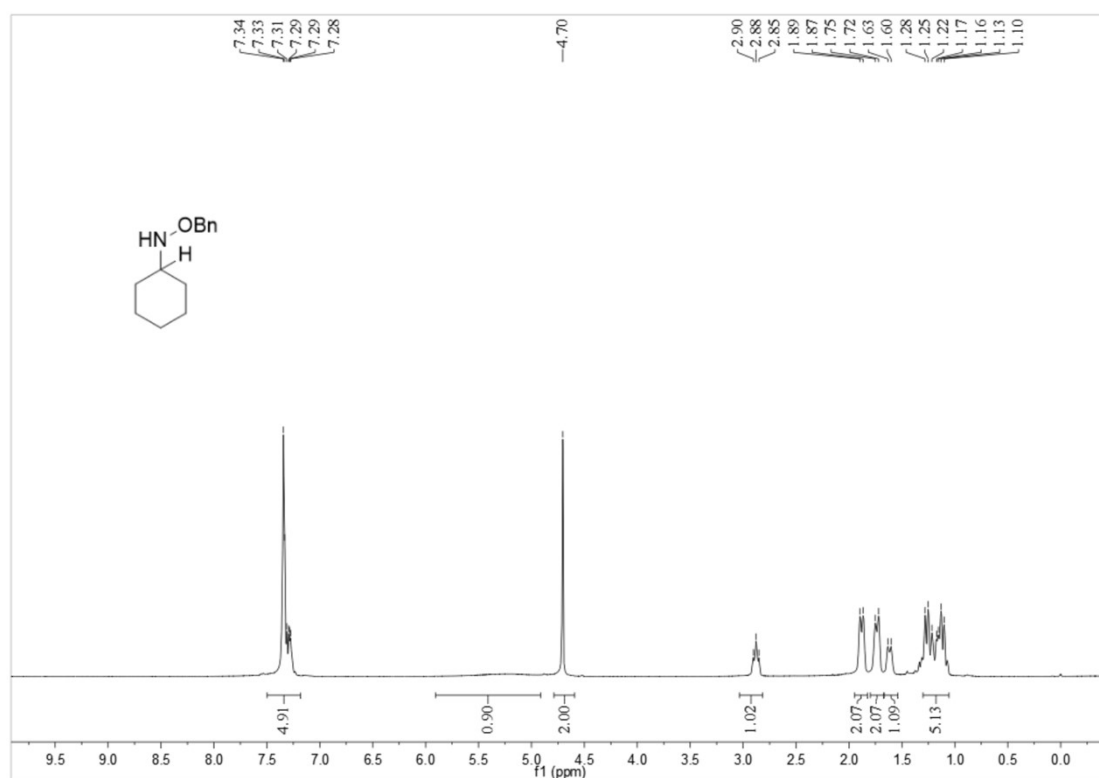

**<sup>13</sup>C NMR spectra of *O*-benzyl-*N*-cyclohexylhydroxylamine (2af)**

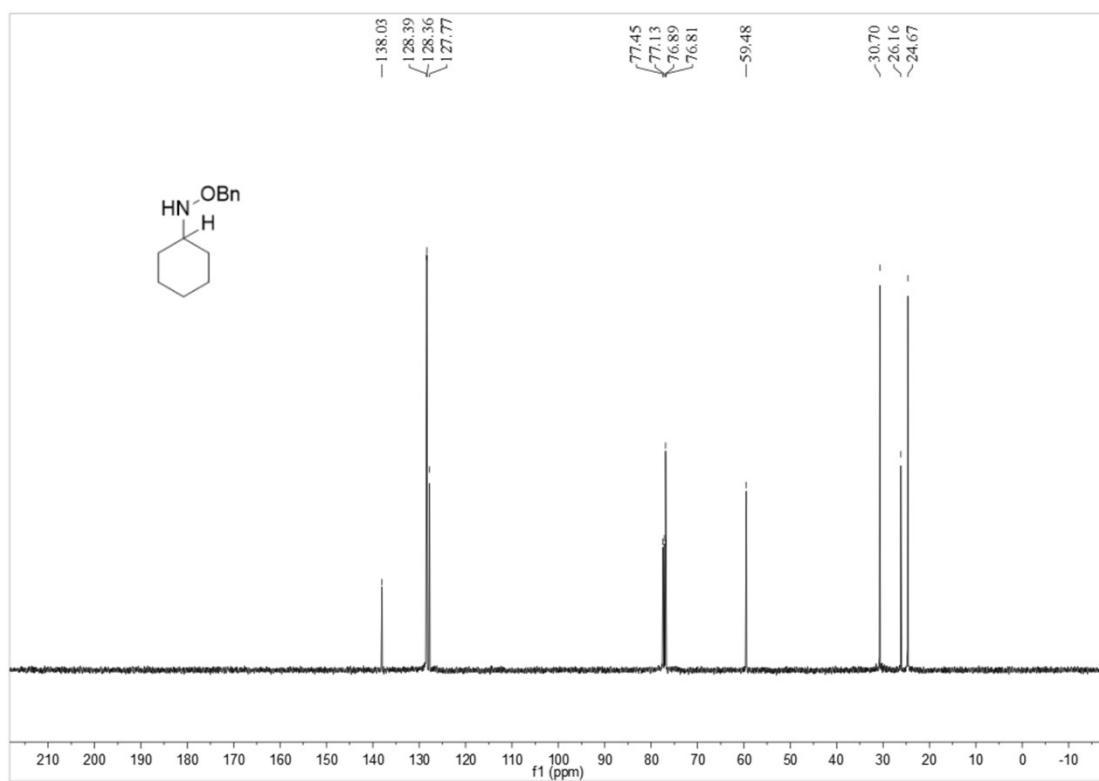

**<sup>1</sup>H NMR spectra of *O*-benzyl-*N*-(5-methoxy-1,2,3,4-tetrahydronaphthalen-1-yl)hydroxylamine (2ag)**

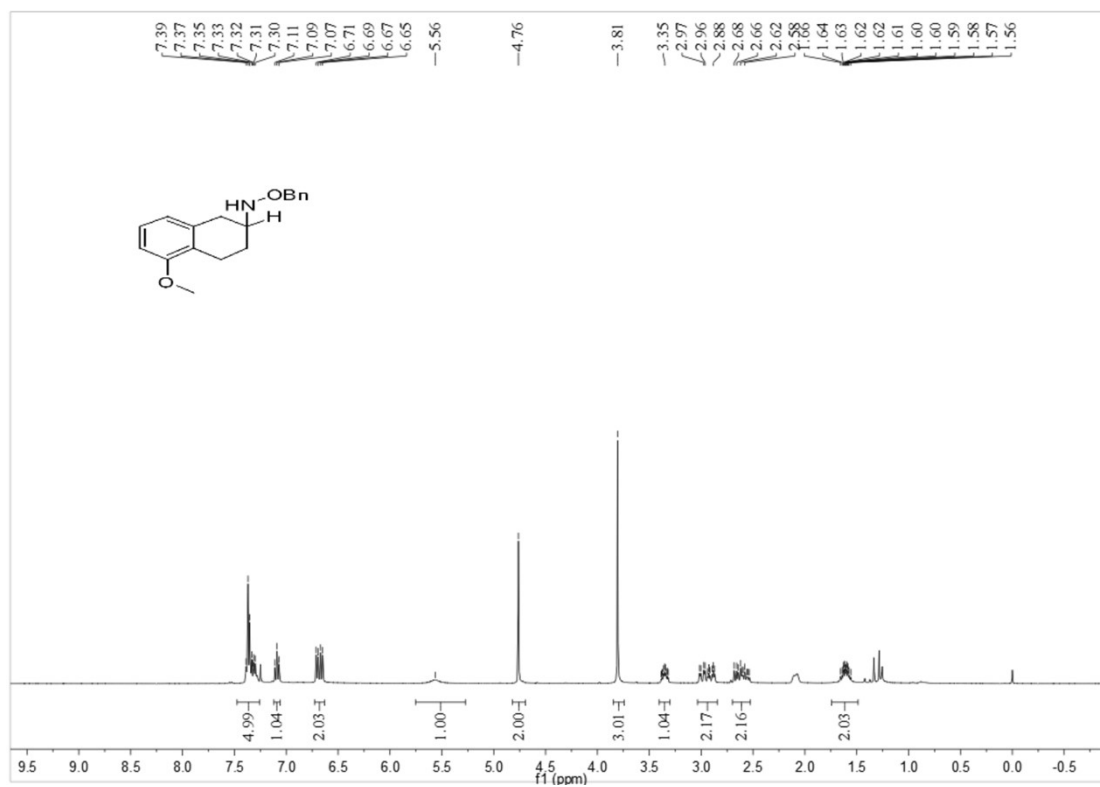

**<sup>13</sup>C NMR spectra of *O*-benzyl-*N*-(5-methoxy-1,2,3,4-tetrahydronaphthalen-1-yl)hydroxylamine (2ag)**

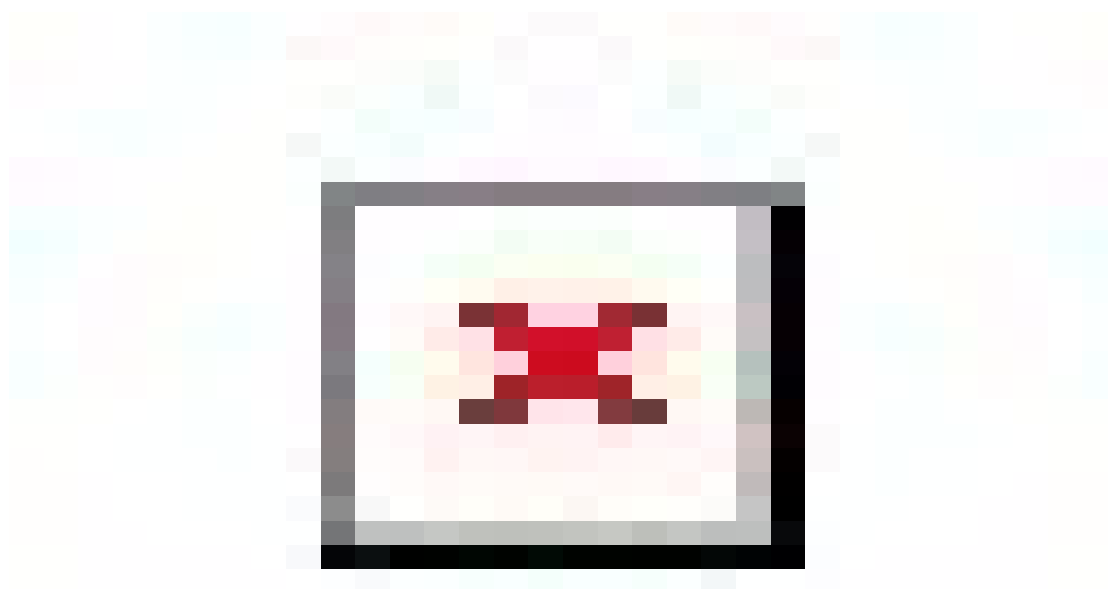

**<sup>1</sup>H NMR spectra of *N*-cyclohexyl-*O*-methylhydroxylamine (2ah)**

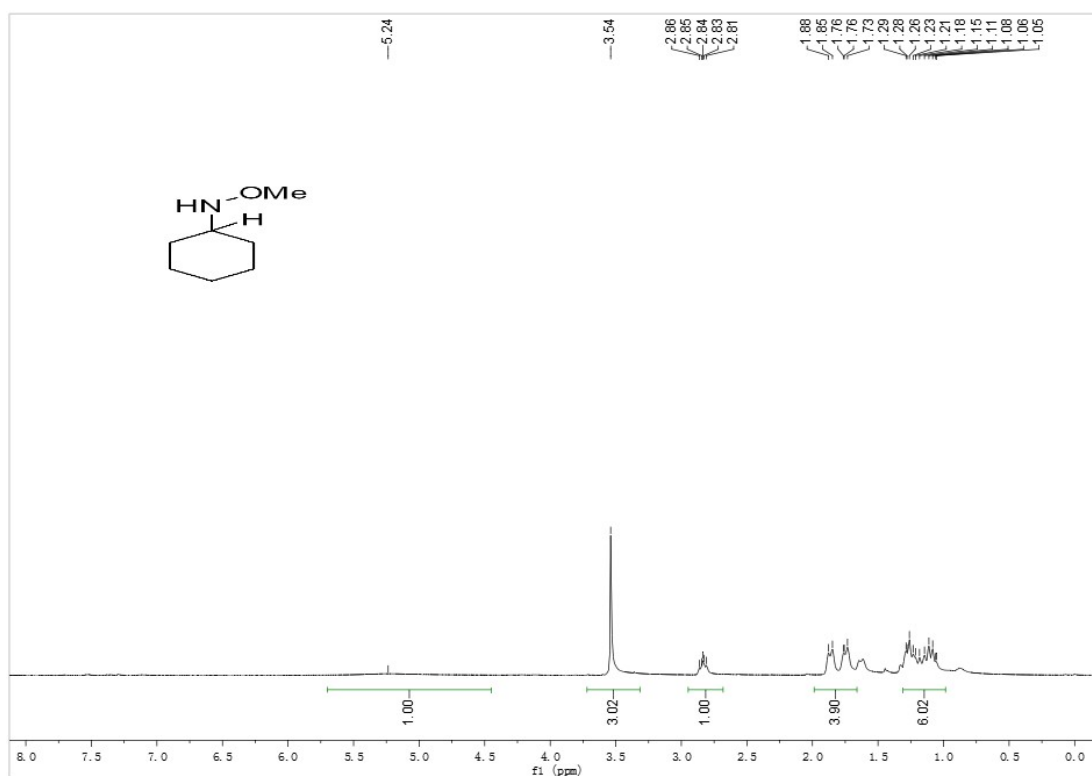

**<sup>13</sup>C NMR spectra of *N*-cyclohexyl-*O*-methylhydroxylamine (2ah)**

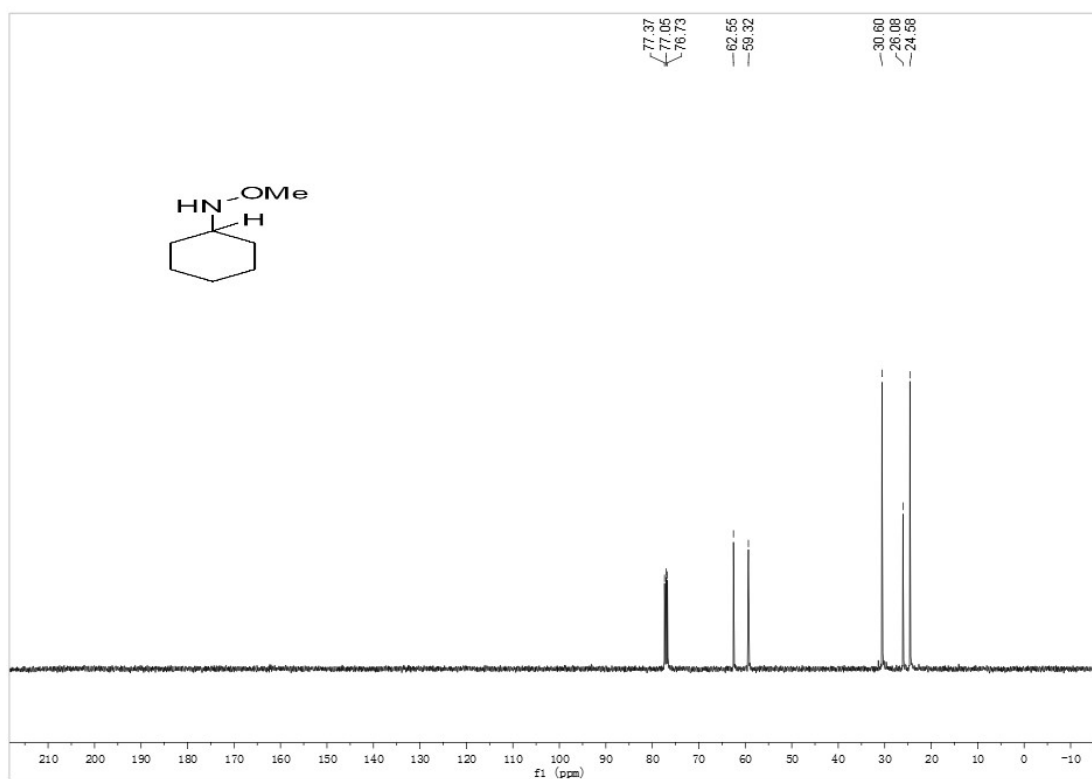

**<sup>1</sup>H NMR spectra of *O*-benzyl-*N*-(4-phenylbutan-2-yl)hydroxylamine (2ai)**



**<sup>13</sup>C NMR spectra of *O*-benzyl-*N*-(4-phenylbutan-2-yl)hydroxylamine (2ai)**

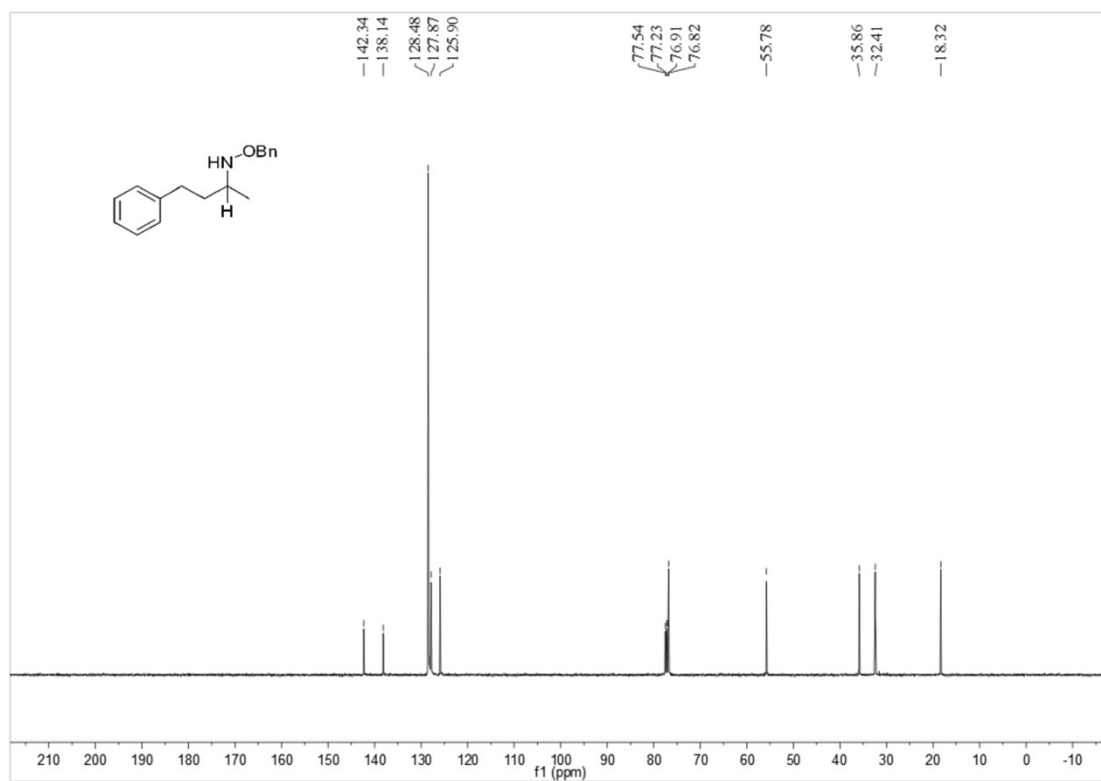

**<sup>1</sup>H NMR spectra of *O*-benzyl-*N*-cyclobutylhydroxylamine (2aj)**

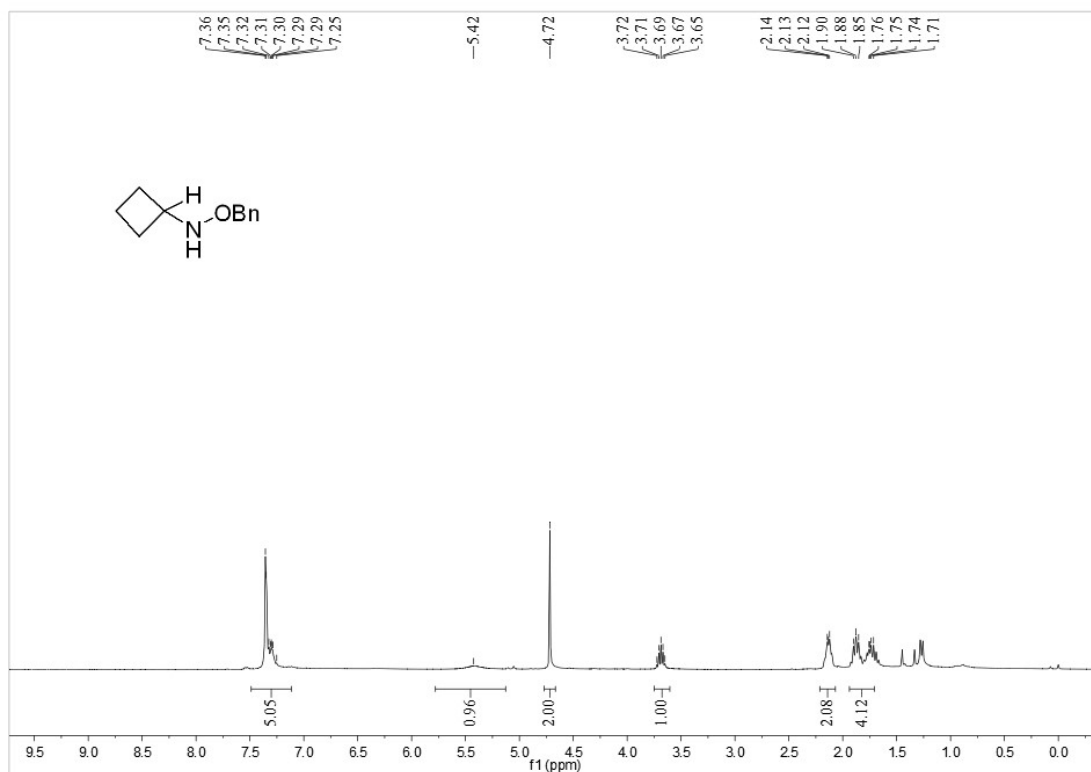

**<sup>13</sup>C NMR spectra of *O*-benzyl-*N*-cyclobutylhydroxylamine (2aj)**

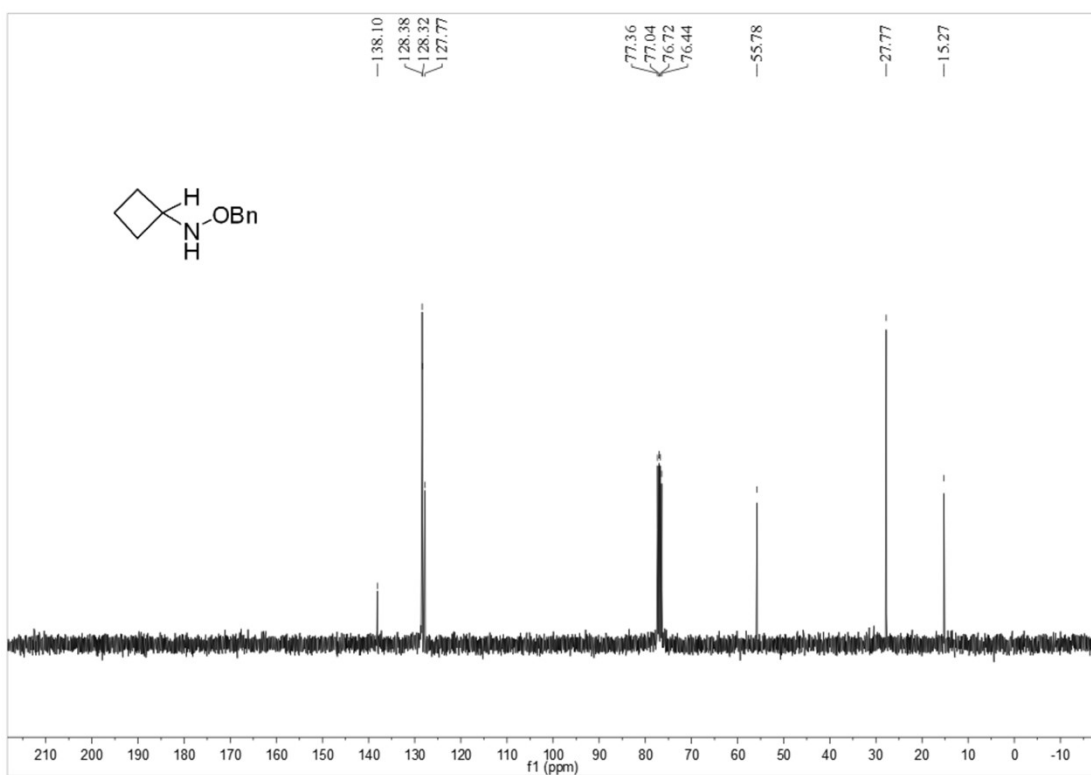

### $^1\text{H}$ NMR spectra of *N*-cyclohexylhydroxylamine (2ak)

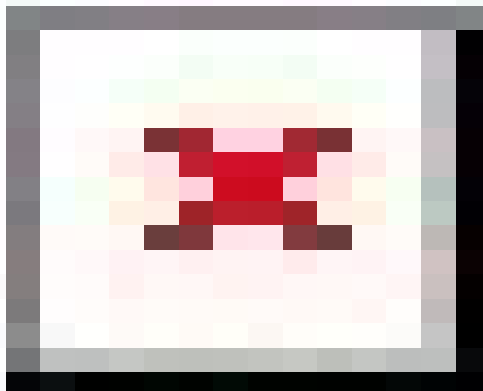

### $^{13}\text{C}$ NMR spectra of *N*-cyclohexylhydroxylamine (2ak)

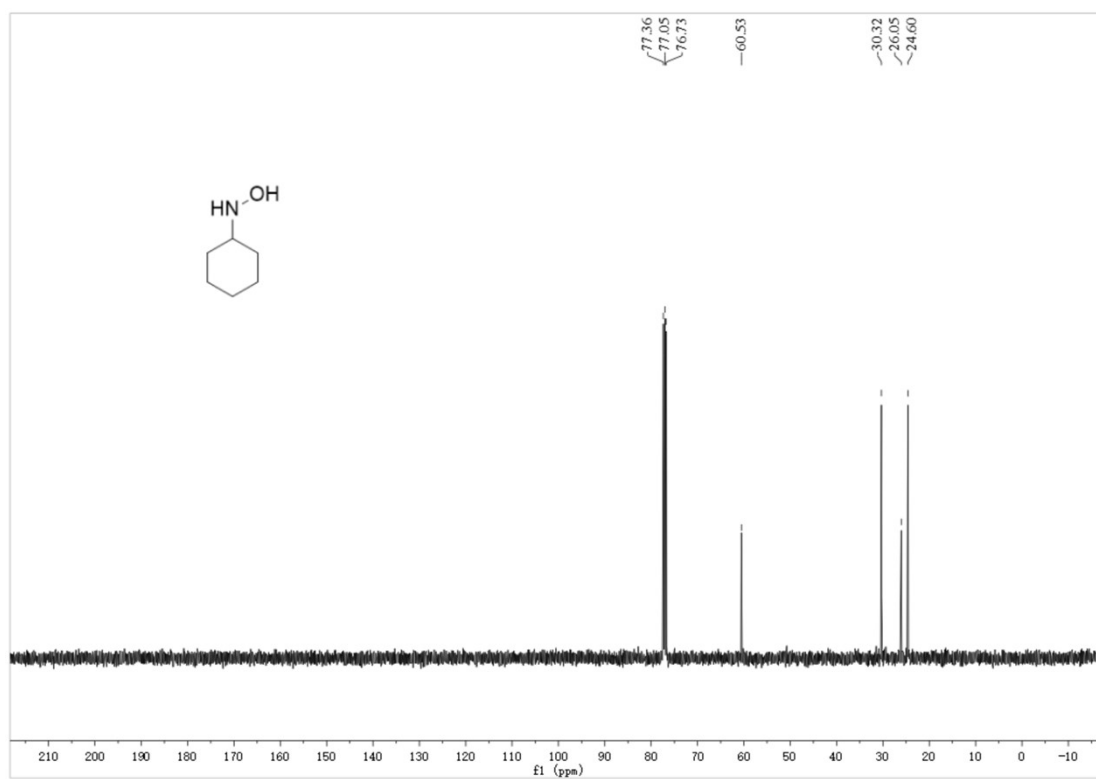



**<sup>1</sup>H NMR spectra of *N*-(5-methoxy-1,2,3,4-tetrahydronaphthalen-2-yl)hydroxylamine (2a)**

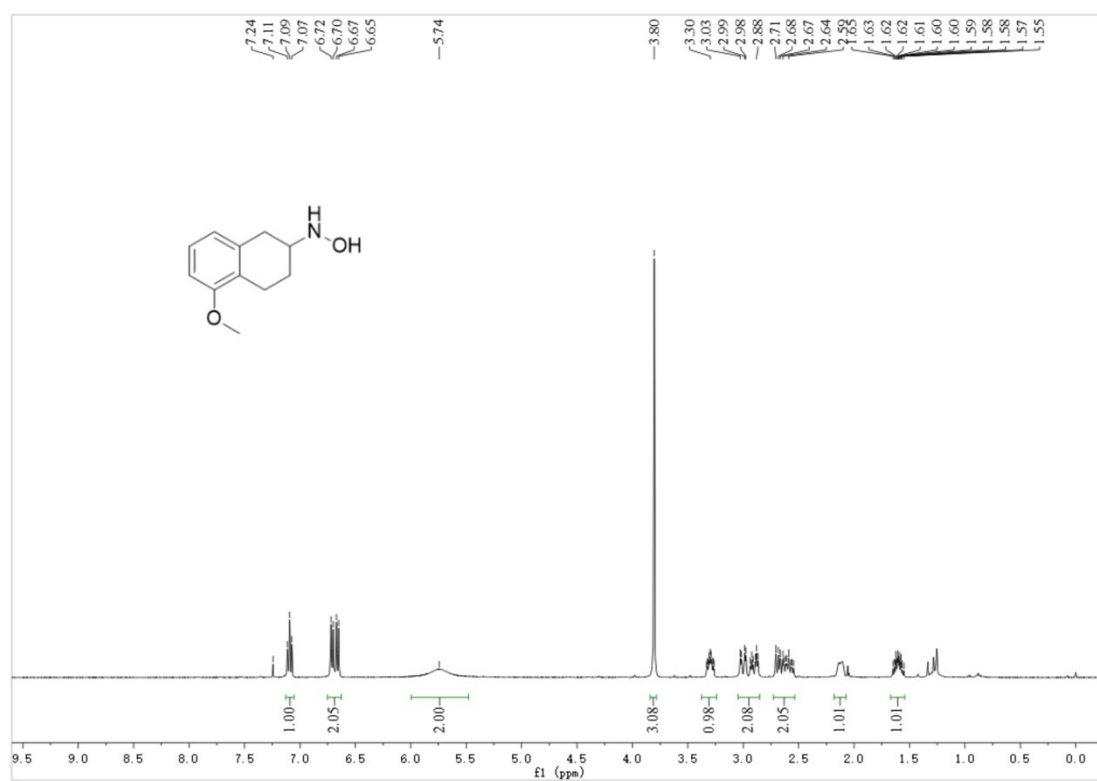

**<sup>13</sup>C NMR spectra of *N*-(5-methoxy-1,2,3,4-tetrahydronaphthalen-2-yl)hydroxylamine (2a)**

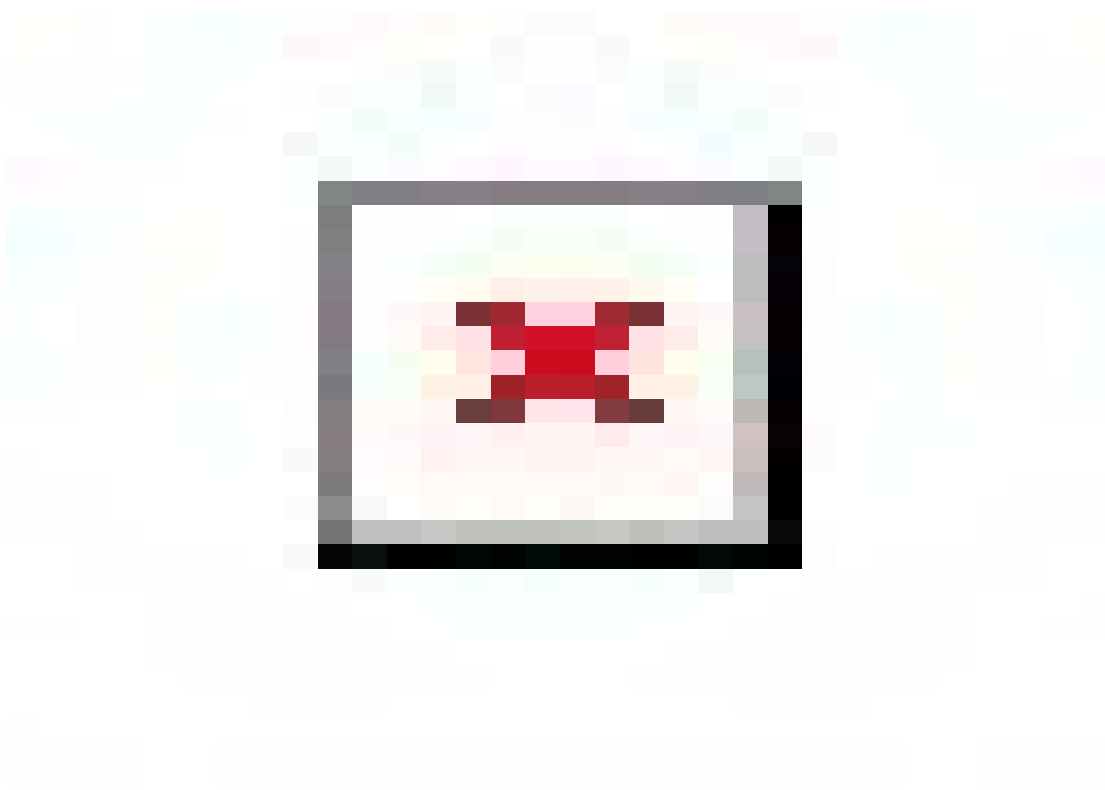

**$^1\text{H}$  NMR spectra of *N*-(4-phenylbutan-2-yl)hydroxylamine (2am)**



**$^{13}\text{C}$  NMR spectra of *N*-(4-phenylbutan-2-yl)hydroxylamine (2am)**



### <sup>1</sup>H NMR spectra of furmecyclox (BASF)

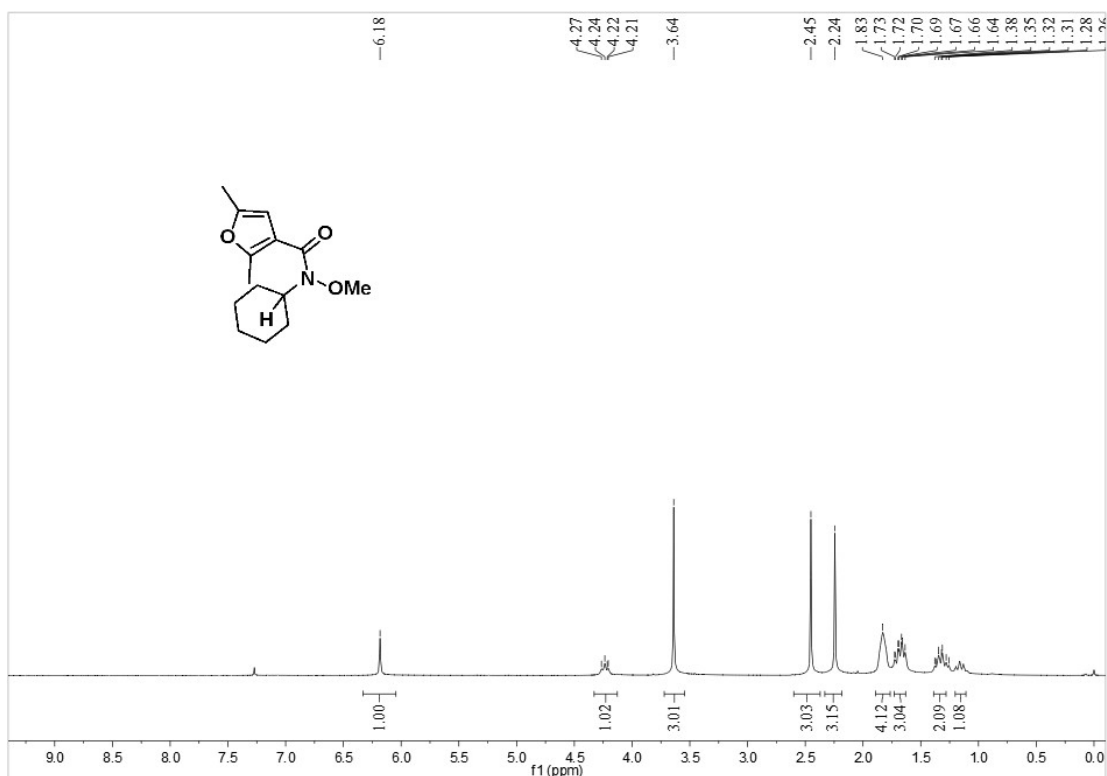

### <sup>13</sup>C NMR spectra of furmecyclox (BASF)

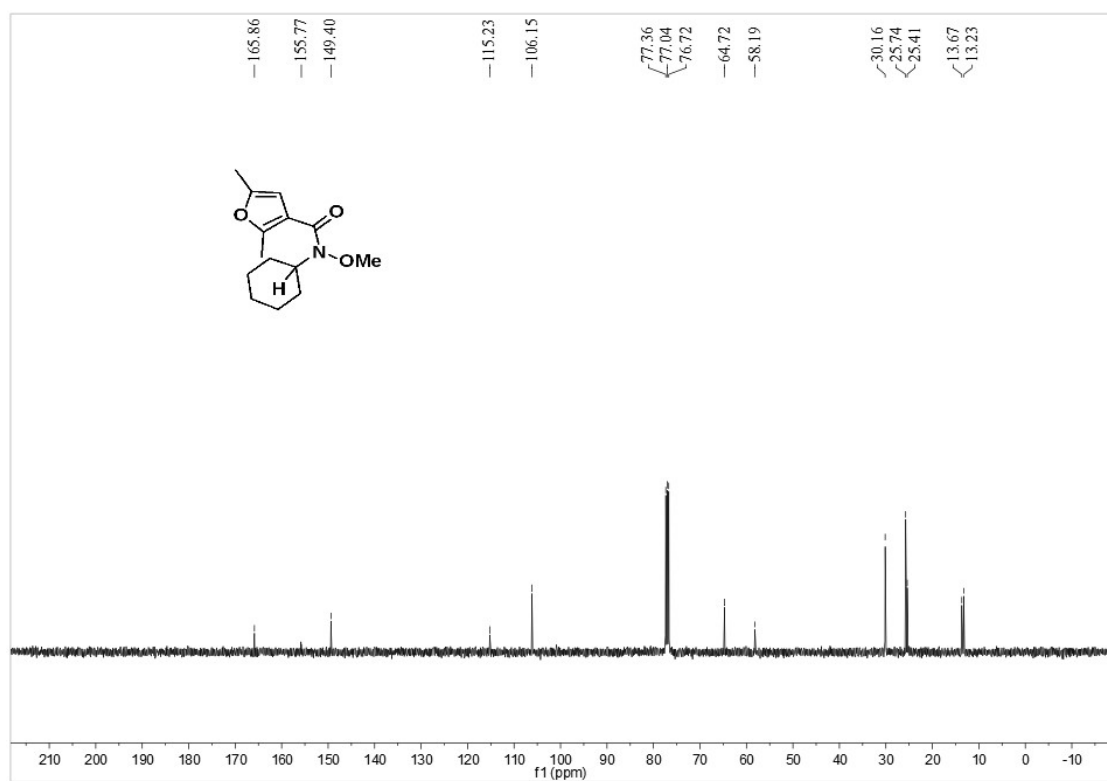

## G. HPLC Spectra

### Racmate product of *O*-benzyl-*N*-(1-phenylethyl)hydroxylamine (2a)

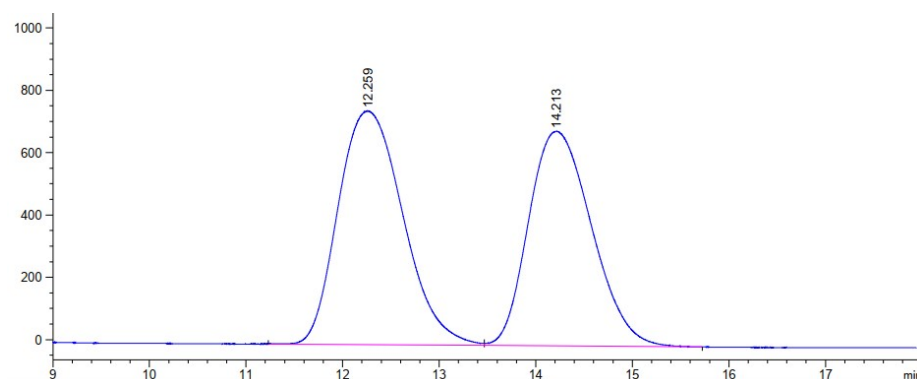

| 峰 # | 保留时间 [min] | 类型   | 峰宽 [min] | 峰面积 [mAU*s] | 峰高 [mAU]  | 峰面积 %   |
|-----|------------|------|----------|-------------|-----------|---------|
| 1   | 12.259     | VV R | 0.5459   | 3.49924e4   | 749.92896 | 52.8096 |
| 2   | 14.213     | VV R | 0.5330   | 3.12690e4   | 688.95001 | 47.1904 |

总量 : 6.62614e4 1438.87897

### Chiral product of *O*-benzyl-*N*-(1-phenylethyl)hydroxylamine (2a)

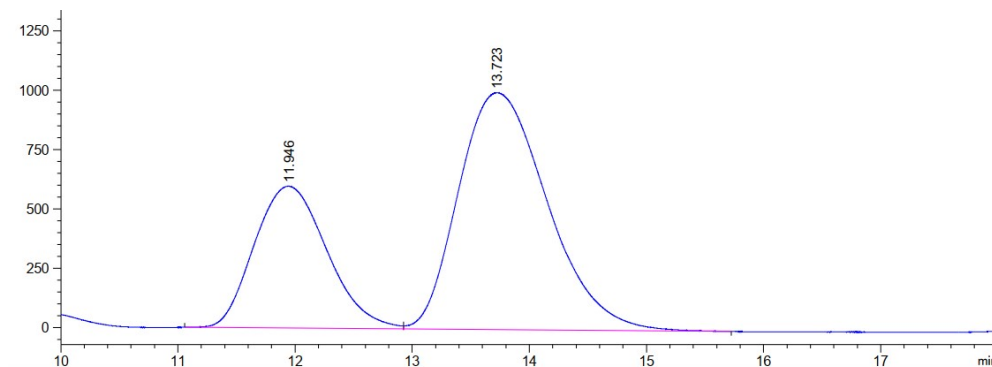

| 峰 # | 保留时间 [min] | 类型   | 峰宽 [min] | 峰面积 [mAU*s] | 峰高 [mAU]  | 峰面积 %   |
|-----|------------|------|----------|-------------|-----------|---------|
| 1   | 11.946     | VV R | 0.5066   | 2.57990e4   | 598.22626 | 32.8785 |
| 2   | 13.723     | VV R | 0.6188   | 5.26688e4   | 998.59039 | 67.1215 |

总量 : 7.84678e4 1596.81665

## H. Crystal X-ray diffraction data of TC-5 and 2I

Metrical parameters for the structures of TC-5 are available free of charge from the Cambridge Crystallographic Data Centre under accession numbers CCDC-2122235.

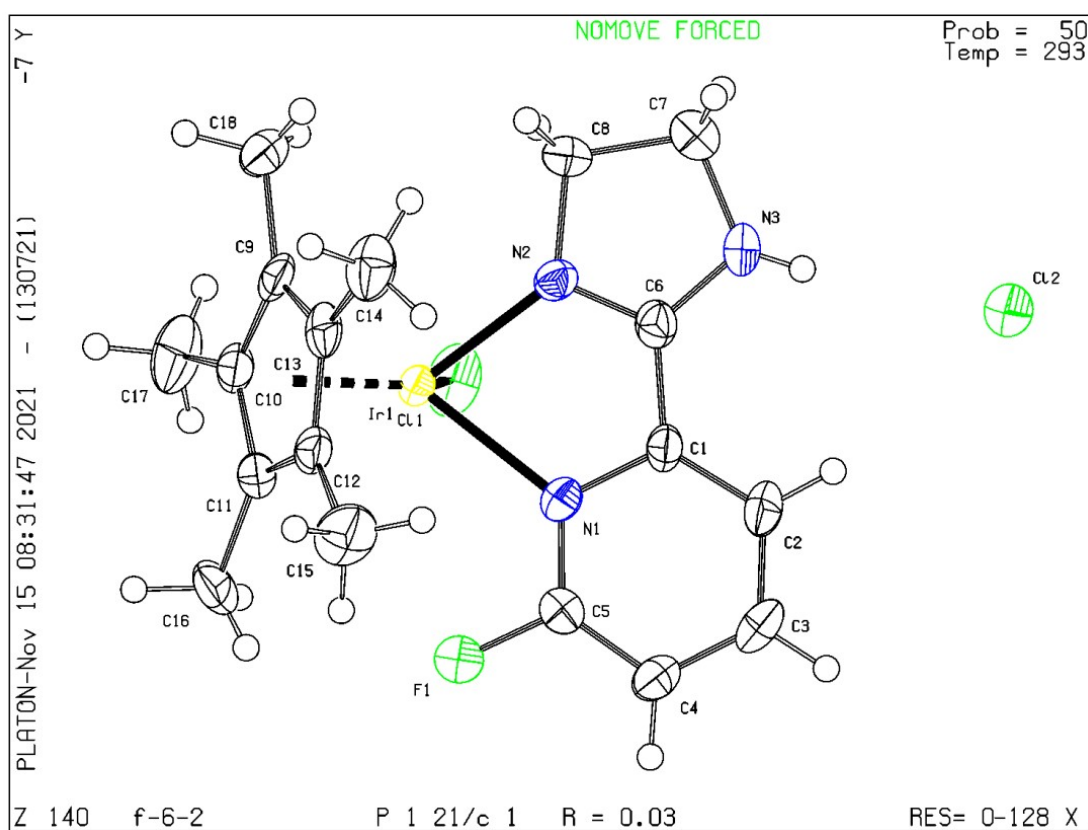

**Figure S1.** X-ray crystal structure of compound TC-5

**Table S1.** Crystal data and structure refinements for **TC-5**.

|                                                |                                                                  |
|------------------------------------------------|------------------------------------------------------------------|
| Identification code                            | <b>TC-5</b>                                                      |
| Empirical formula                              | $C_{18}H_{23}Cl_2FIrN_3$                                         |
| Formula weight                                 | 563.49                                                           |
| Temperature/K                                  | 292.98(10)                                                       |
| Crystal system                                 | monoclinic                                                       |
| Space group                                    | $P2_1/c$                                                         |
| a/Å                                            | 14.8663(5)                                                       |
| b/Å                                            | 8.1427(3)                                                        |
| c/Å                                            | 16.8048(6)                                                       |
| $\alpha/^\circ$                                | 90                                                               |
| $\beta/^\circ$                                 | 93.871(4)                                                        |
| $\gamma/^\circ$                                | 90                                                               |
| Volume/Å <sup>3</sup>                          | 2029.61(12)                                                      |
| Z                                              | 4                                                                |
| $\rho_{\text{calc}}/\text{g}/\text{cm}^3$      | 1.844                                                            |
| $\mu/\text{mm}^{-1}$                           | 6.856                                                            |
| F(000)                                         | 1088.0                                                           |
| Crystal size/mm <sup>3</sup>                   | 0.14 × 0.13 × 0.12                                               |
| Radiation                                      | Mo K $\alpha$ ( $\lambda = 0.71073$ )                            |
| 2 $\Theta$ range for data collection/ $^\circ$ | 4.858 to 49.996                                                  |
| Index ranges                                   | -17 ≤ h ≤ 16, -7 ≤ k ≤ 9, -19 ≤ l ≤ 15                           |
| Reflections collected                          | 8631                                                             |
| Independent reflections                        | 3573 [ $R_{\text{int}} = 0.0361$ , $R_{\text{sigma}} = 0.0478$ ] |
| Data/restraints/parameters                     | 3573/0/235                                                       |
| Goodness-of-fit on F <sup>2</sup>              | 1.023                                                            |
| Final R indexes [ $I \geq 2\sigma(I)$ ]        | $R_1 = 0.0296$ , $wR_2 = 0.0641$                                 |
| Final R indexes [all data]                     | $R_1 = 0.0356$ , $wR_2 = 0.0673$                                 |
| Largest diff. peak/hole / e Å <sup>-3</sup>    | 0.77/-1.57                                                       |

Metrical parameters for the structures of **21** are available free of charge from the Cambridge Crystallographic Data Centre under accession numbers CCDC-2123580.

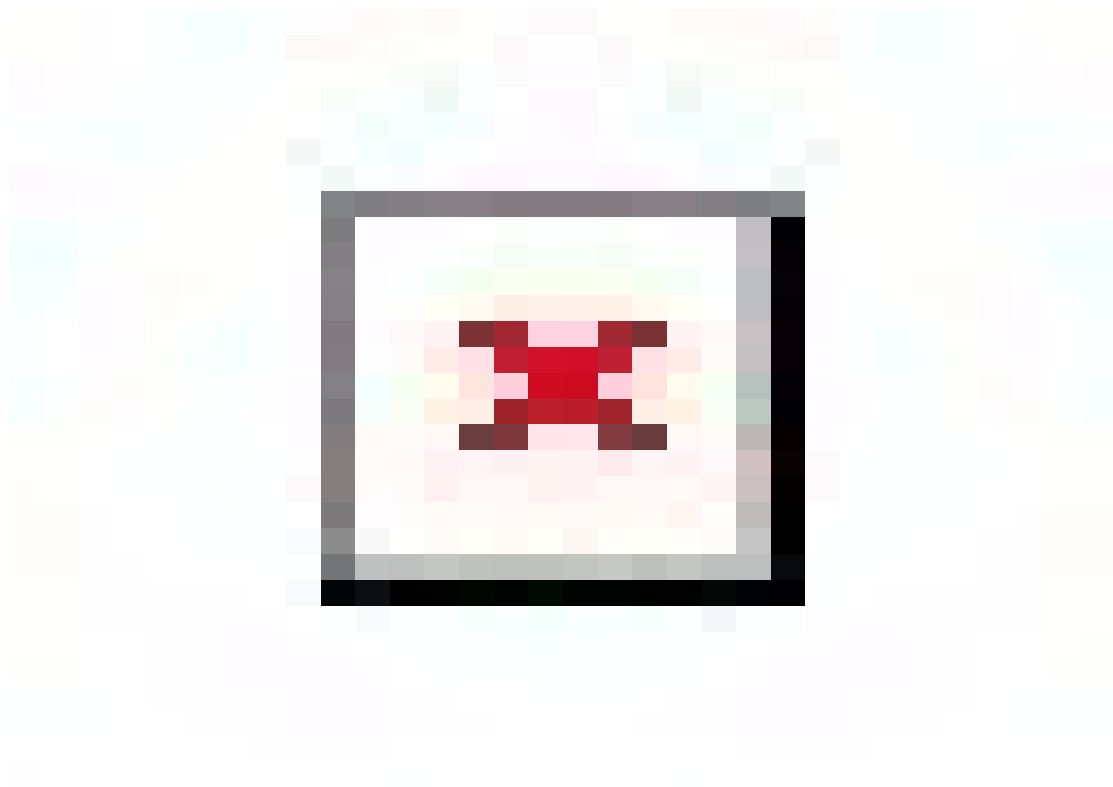

**Figure S2.** X-ray crystal structure of compound **21**

**Table S2.** Crystal data and structure refinements for **2I**.

|                                             |                                                                |
|---------------------------------------------|----------------------------------------------------------------|
| Identification code                         | <b>2I</b>                                                      |
| Empirical formula                           | C <sub>19</sub> H <sub>19</sub> NO                             |
| Formula weight                              | 277.35                                                         |
| Temperature/K                               | 149.99(10)                                                     |
| Crystal system                              | monoclinic                                                     |
| Space group                                 | P2 <sub>1</sub> /c                                             |
| a/Å                                         | 5.7379(3)                                                      |
| b/Å                                         | 8.2844(5)                                                      |
| c/Å                                         | 31.6487(19)                                                    |
| $\alpha$ /°                                 | 90                                                             |
| $\beta$ /°                                  | 91.477(6)                                                      |
| $\gamma$ /°                                 | 90                                                             |
| Volume/Å <sup>3</sup>                       | 1503.92(15)                                                    |
| Z                                           | 4                                                              |
| $\rho_{\text{calc}}/\text{cm}^3$            | 1.225                                                          |
| $\mu/\text{mm}^{-1}$                        | 0.584                                                          |
| F(000)                                      | 592.0                                                          |
| Crystal size/mm <sup>3</sup>                | 0.13 × 0.12 × 0.1                                              |
| Radiation                                   | Cu K $\alpha$ ( $\lambda$ = 1.54184)                           |
| 2 $\Theta$ range for data collection/°      | 5.586 to 147.504                                               |
| Index ranges                                | -6 ≤ h ≤ 6, -10 ≤ k ≤ 9, -39 ≤ l ≤ 36                          |
| Reflections collected                       | 5434                                                           |
| Independent reflections                     | 2933 [ $R_{\text{int}}$ = 0.0397, $R_{\text{sigma}}$ = 0.0498] |
| Data/restraints/parameters                  | 2933/0/195                                                     |
| Goodness-of-fit on F <sup>2</sup>           | 1.042                                                          |
| Final R indexes [ $I \geq 2\sigma(I)$ ]     | $R_1$ = 0.0642, $wR_2$ = 0.1686                                |
| Final R indexes [all data]                  | $R_1$ = 0.0784, $wR_2$ = 0.1769                                |
| Largest diff. peak/hole / e Å <sup>-3</sup> | 0.20/-0.29                                                     |



### I. The Deuterated experiment.

Scheme 7a.  $\text{CF}_3\text{CO}_2\text{D}$  was employed as additive under standard conditions.

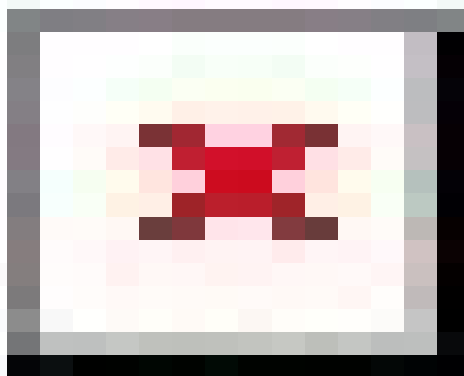

Scheme 7b.  $\text{DCO}_2\text{D}$  was employed as additive under standard conditions.

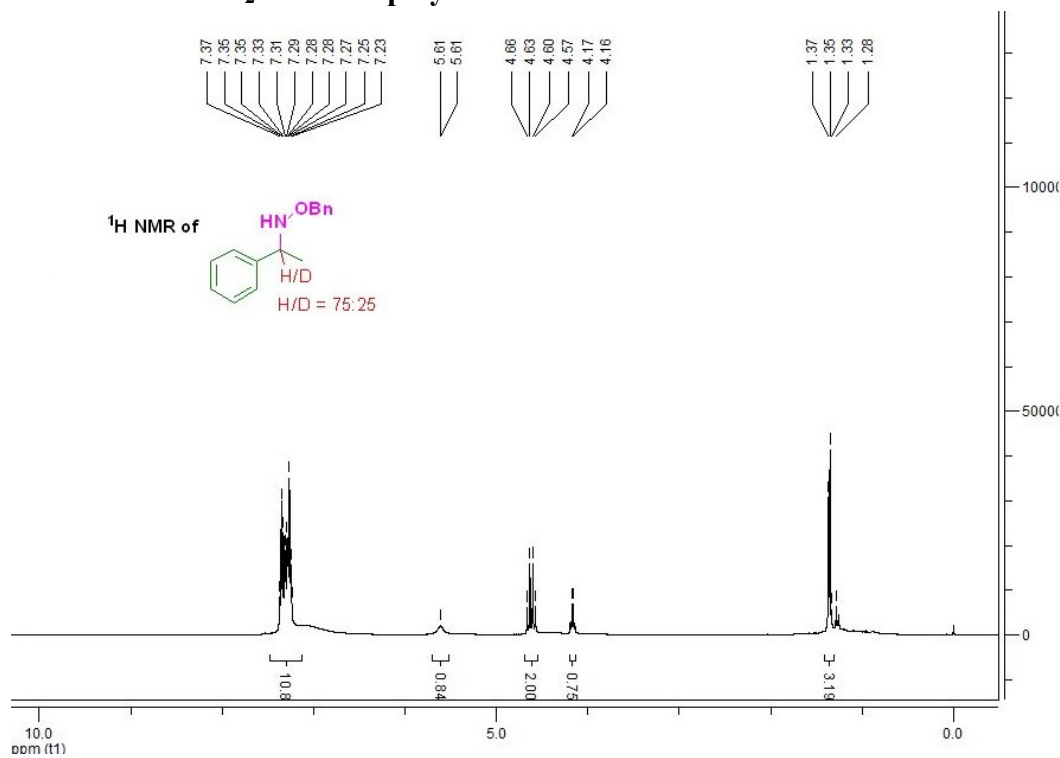

## J. The H<sup>-</sup> chemical shift of Ir-H.

The H<sup>-</sup> chemical shift of Ir-H determined by <sup>1</sup>H NMR spectra.

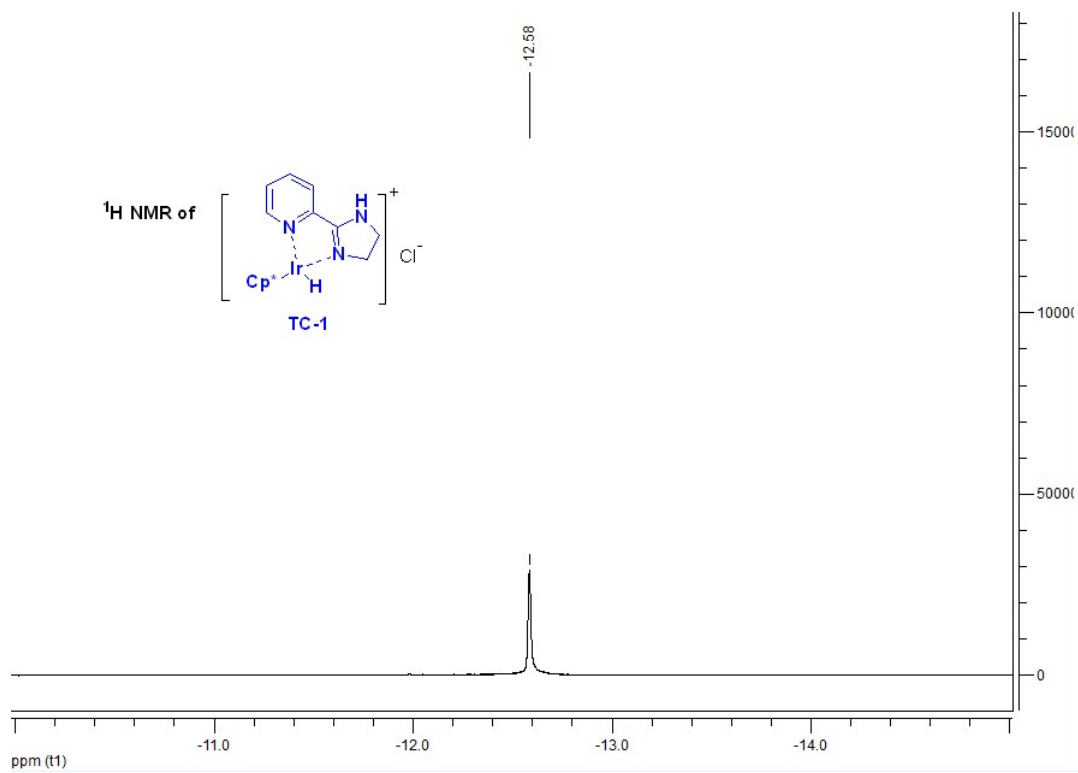

Supplement: d2ob01084d1.pdf [file d2ob01084d1.pdf]
